# Supplementary material for: Anti-Inflammatory Halogenated Monoterpenes from the Red Alga Portieria hornemannii
Source: MDPI journal article supplement (doi:10.3390/md21090493), 2023-09-14
Supplement: s1 [file s1]

# Anti-inflammatory Halogenated Monoterpenes from the Red Alga *Portieria hornemannii*

Yuan-Jhong Wu <sup>1,†</sup>, Tzu-Yin Huang <sup>2,†</sup>, Chiung-Yao Huang <sup>1</sup>, Chi-Chen Lin <sup>3</sup>, Wei-Lung Wang <sup>4</sup>, Hui-Chi Huang <sup>5</sup>, Shang-Yin Vanson Liu <sup>1</sup>, Chih-Hua Chao <sup>6,7,\*</sup> and Jyh-Horng Sheu <sup>1,8,9,\*</sup>

<sup>1</sup> Department of Marine Biotechnology and Resources, National Sun Yat-sen University, Kaohsiung 804, Taiwan; yuan19942@gmail.com (Y.J.W.); betty8575@yahoo.com.tw (C.Y.H.); syvliu@mail.nsysu.edu.tw (S.Y.V.L.)

<sup>2</sup> Institute of Biological Chemistry, Academia Sinica, Taipei 115, Taiwan; slime112229@gmail.com (T.Y.H.)

<sup>3</sup> Institute of Biomedical Science, National Chung Hsing University, Taichung 402, Taiwan; lincc@dragon.nchu.edu.tw (C.C.L.)

<sup>4</sup> Department of Biology, National Changhua University of Education, Changhua 500, Taiwan; wlwang@cc.ncue.edu.tw (W.L.W.)

<sup>5</sup> Department of Chinese Pharmaceutical Sciences and Chinese Medicine Resources, China Medical University, Taichung, 404, Taiwan; hchuang@mail.cmu.edu.tw (H.C.H.)

<sup>6</sup> School of Pharmacy, China Medical University, Taichung 404, Taiwan

<sup>7</sup> Chinese Medicine Research and Development Center, China Medical University Hospital, Taichung 404, Taiwan

<sup>8</sup> Department of Medical Research, China Medical University Hospital, China Medical University, Taichung 404, Taiwan

<sup>9</sup> Graduate Institute of Natural Products, Kaohsiung Medical University, Kaohsiung 807, Taiwan

<sup>†</sup> These authors contributed equally to this work.

\* Correspondence: chchao@mail.cmu.edu.tw (C.H.C.); Tel: +886-4-22053366 (ext. 5157) (C.H.C.); Fax: +886-4-22078083 (C.H.C.); sheu@mail.nsysu.edu.tw (J.H.S.); Tel.: +886-7-525-2000 (ext. 5030) (J.H.S.); Fax: +886-7-525-5020 (J.H.S.)

**Figure S1.** (+)-EIMS spectrum of **1**.  
**Figure S2.** (+)-HREIMS spectrum of **1**.  
**Figure S3.**  $^1\text{H}$  NMR spectrum of **1** in  $\text{CDCl}_3$ .  
**Figure S4.**  $^{13}\text{C}$  NMR spectrum of **1** in  $\text{CDCl}_3$ .  
**Figure S5.** DEPT135 (upper) and DEPT90 (lower) spectra of **1** in  $\text{CDCl}_3$ .  
**Figure S6.** HSQC spectrum of **1** in  $\text{CDCl}_3$ .  
**Figure S7.** COSY spectrum of **1** in  $\text{CDCl}_3$ .  
**Figure S8.** HMBC spectrum of **1** in  $\text{CDCl}_3$ .  
**Figure S9.** NOESY spectrum of **1** in  $\text{CDCl}_3$ .  
**Figure S10.** (+)-HRCIMS spectrum of **2**.  
**Figure S11.** Enlarged (+)-HRCIMS spectrum of **2**.  
**Figure S12.**  $^1\text{H}$  NMR spectrum of **2** in  $\text{CDCl}_3$ .  
**Figure S13.**  $^{13}\text{C}$  NMR spectrum of **2** in  $\text{CDCl}_3$ .  
**Figure S14.** DEPT135 (upper) and DEPT90 (lower) spectra of **2** in  $\text{CDCl}_3$ .  
**Figure S15.** HSQC spectrum of **2** in  $\text{CDCl}_3$ .  
**Figure S16.** COSY spectrum of **2** in  $\text{CDCl}_3$ .  
**Figure S17.** HMBC spectrum of **2** in  $\text{CDCl}_3$ .  
**Figure S18.** NOESY spectrum of **2** in  $\text{CDCl}_3$ .  
**Figure S19.** (+)-HRCIMS spectrum of **3**.  
**Figure S20.** Enlarged (+)-HRCIMS spectrum of **3**.  
**Figure S21.**  $^1\text{H}$  NMR spectrum of **3** in  $\text{CDCl}_3$ .  
**Figure S22.**  $^{13}\text{C}$  NMR spectrum of **3** in  $\text{CDCl}_3$ .  
**Figure S23.**  $^1\text{H}$  NMR spectrum of **3** in acetone- $d_6$ .  
**Figure S24.**  $^{13}\text{C}$  NMR spectrum of **3** in acetone- $d_6$ .  
**Figure S25.** DEPT135 (upper) and DEPT90 (lower) spectra of **3** in acetone- $d_6$ .  
**Figure S26.** HSQC spectrum of **3** in acetone- $d_6$ .  
**Figure S27.** COSY spectrum of **3** in acetone- $d_6$ .  
**Figure S28.** HMBC spectrum of **3** in acetone- $d_6$ .  
**Figure S29.** NOESY spectrum of **3** in acetone- $d_6$ .  
**Figure S30.** Experimental and GIAO NMR calculated data for  $3R^*,4S^*,7S^*$ -**1** (isomer 1) and  $3R^*,4S^*,7R^*$ -**1** (isomer 2) following the STS method. (a) Data were generated following the STS method without further dichloro correction. (b) Data were generated following the STS method with further correction for dichloro carbon (marked in red).  
**Figure S31.** Experimental and GIAO NMR calculated data for  $3R^*,4S^*,7S^*$ -**2** (isomer 1) and  $3R^*,4S^*,7R^*$ -**2** (isomer 2) following the STS method. (a) Data were generated following the STS method without further dichloro correction. (b) Data were generated following the STS method with further correction for dichloro carbon (marked in red).  
**Figure S32.** Experimental and GIAO NMR calculated data for  $7Z$ -**3** (isomer 1) and  $7E$ -**3** (isomer 2) following the STS method. (a) Data were generated following the STS method without further dibromo correction. (b) Data were generated following the STS

method with further correction for dibromo carbon (marked in red).

**Table S1.**  $^1\text{H}$  and  $^{13}\text{C}$  NMR spectroscopic data of **3**, **4**, and **5** in acetone- $d_6$ .

**Table S2.** Comparison of specific optical rotations and selected NMR data of synthetic halogenated monoterpenes.

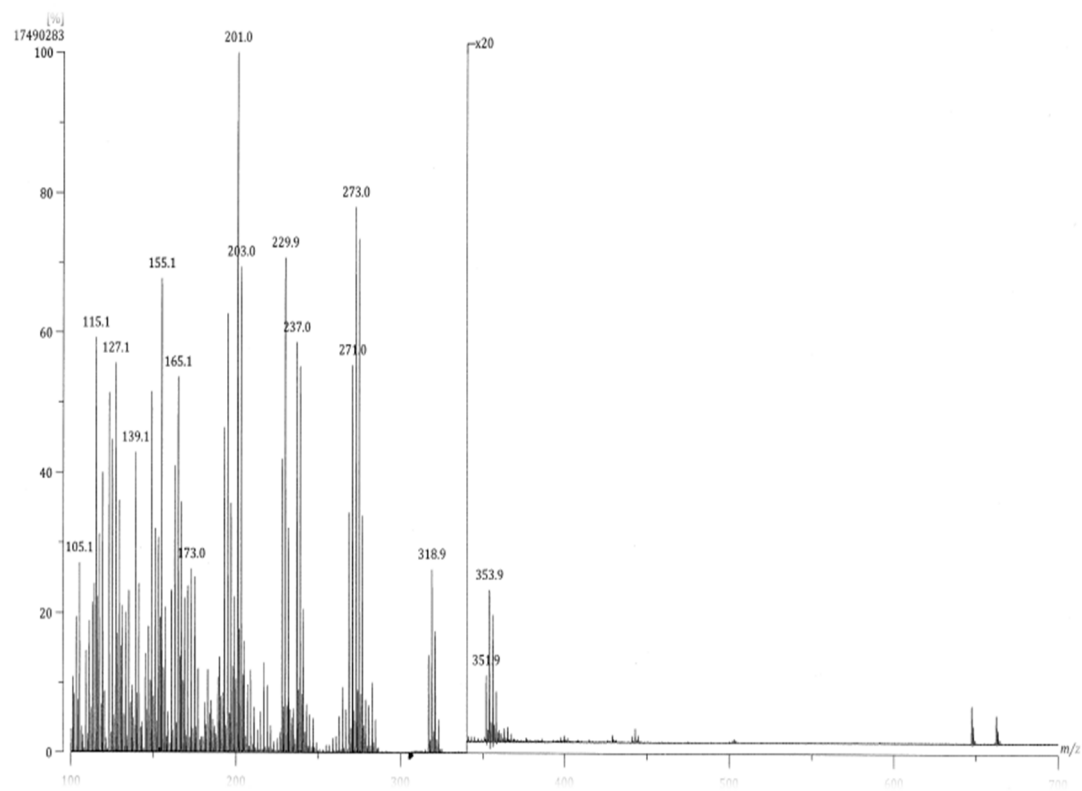

**Figure S1.** (+)-EIMS spectrum of **1**.

Molecular Formula]

Data : 20190425\_UJ2-6-3-1-HR-002 Date : 25-Apr-2019 17:27

Instrument : JMS-700

Sample : UJ2-6-3-1

Vote : 70eV

Ion Mode : EI+

RT : 0.14 min Molecular Formula : C<sub>10</sub>H<sub>13</sub>BrCl<sub>4</sub>

Elements : C 10/10, H 1000/0, 79Br 1/0, 81Br 1/0, 35Cl 4/0, 37Cl 4/0 (theoretical)

Mass Tolerance : 10mmu

Insaturation (U.S.) : -0.5 - 1000.0

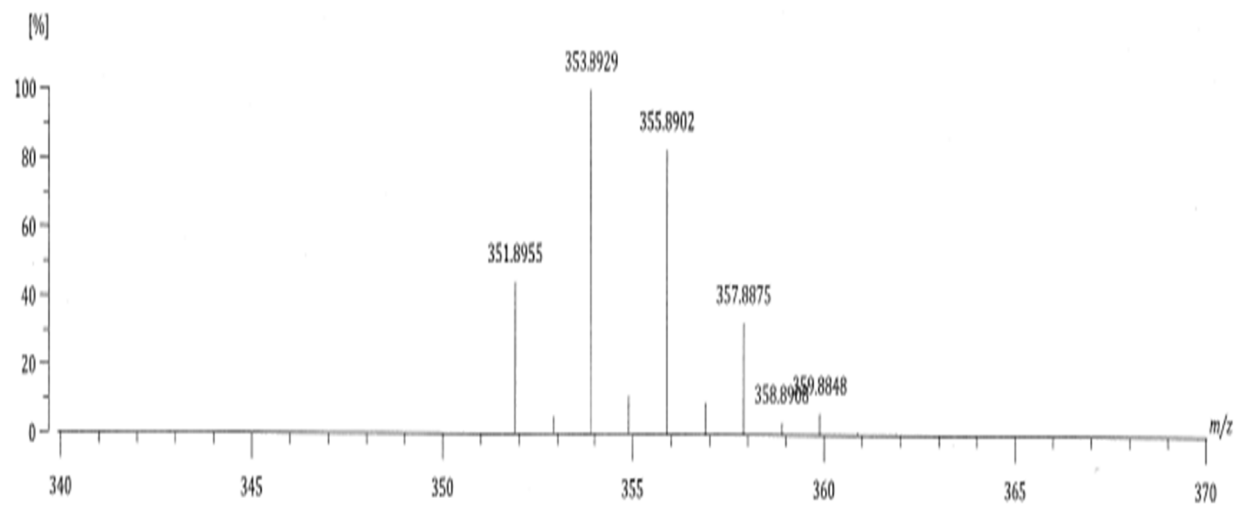

**Figure S2. (+)-HREIMS spectrum of 1.**

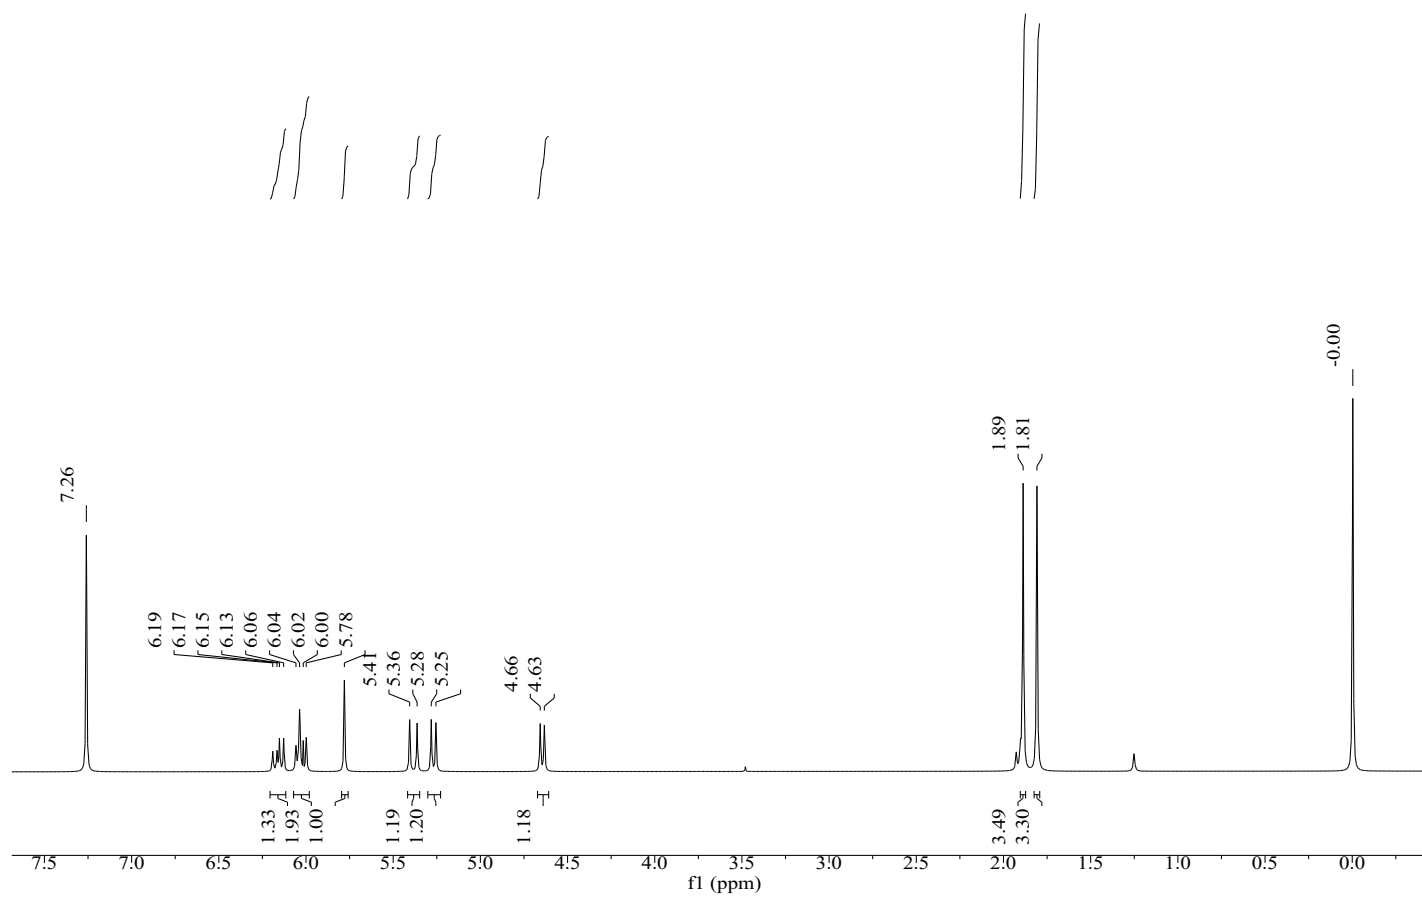

**Figure S3.** <sup>1</sup>H NMR spectrum of **1** in CDCl<sub>3</sub>.

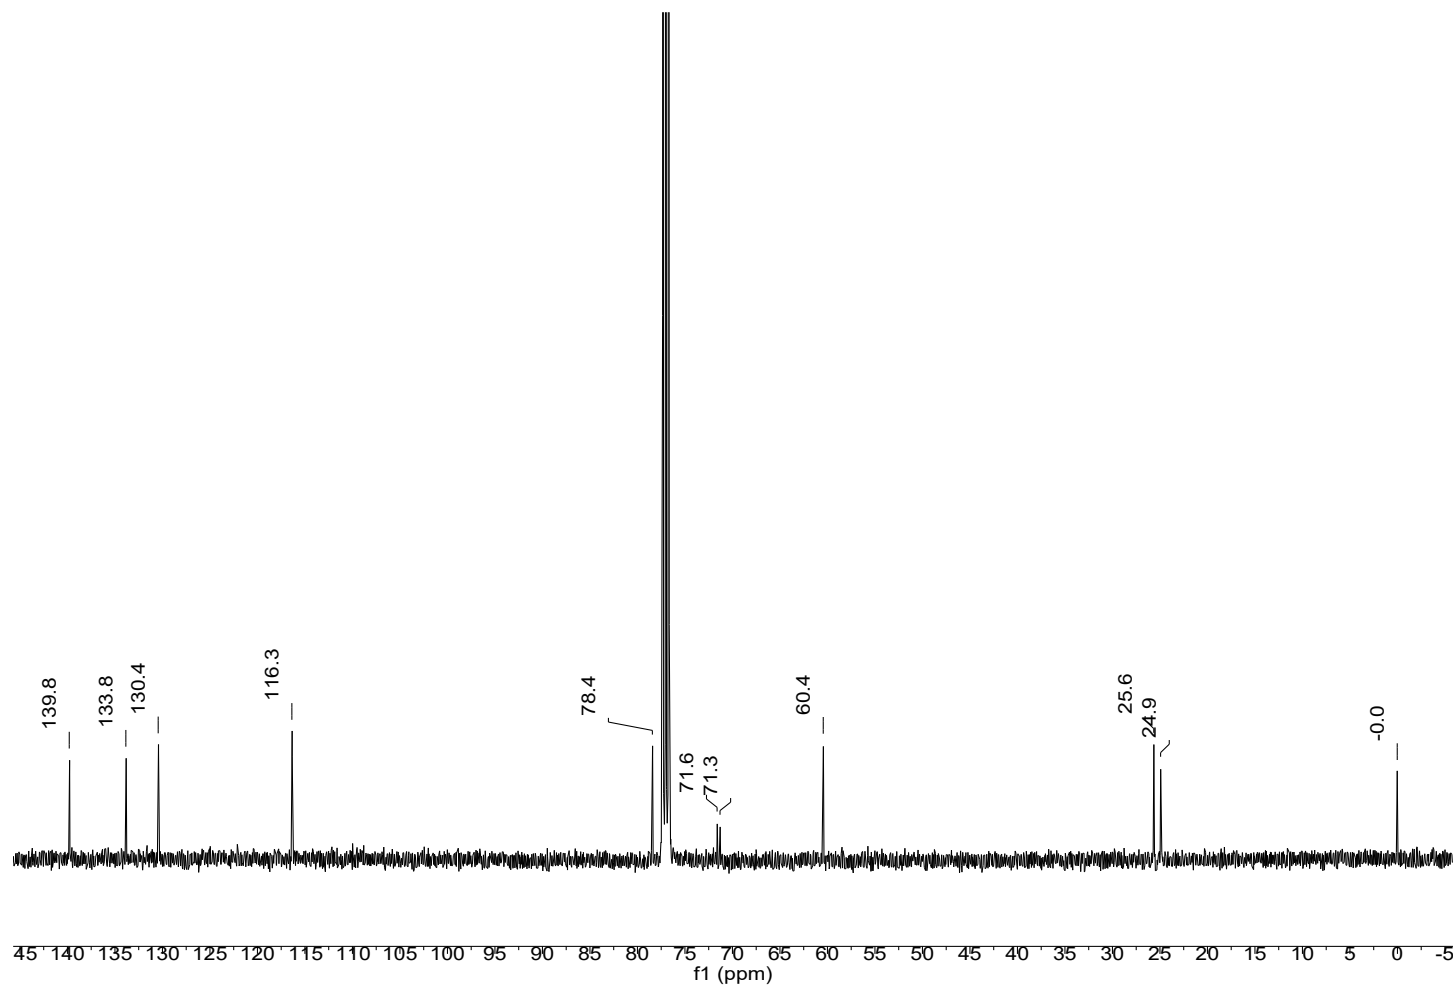

**Figure S4.** <sup>13</sup>C NMR spectrum of **1** in CDCl<sub>3</sub>.

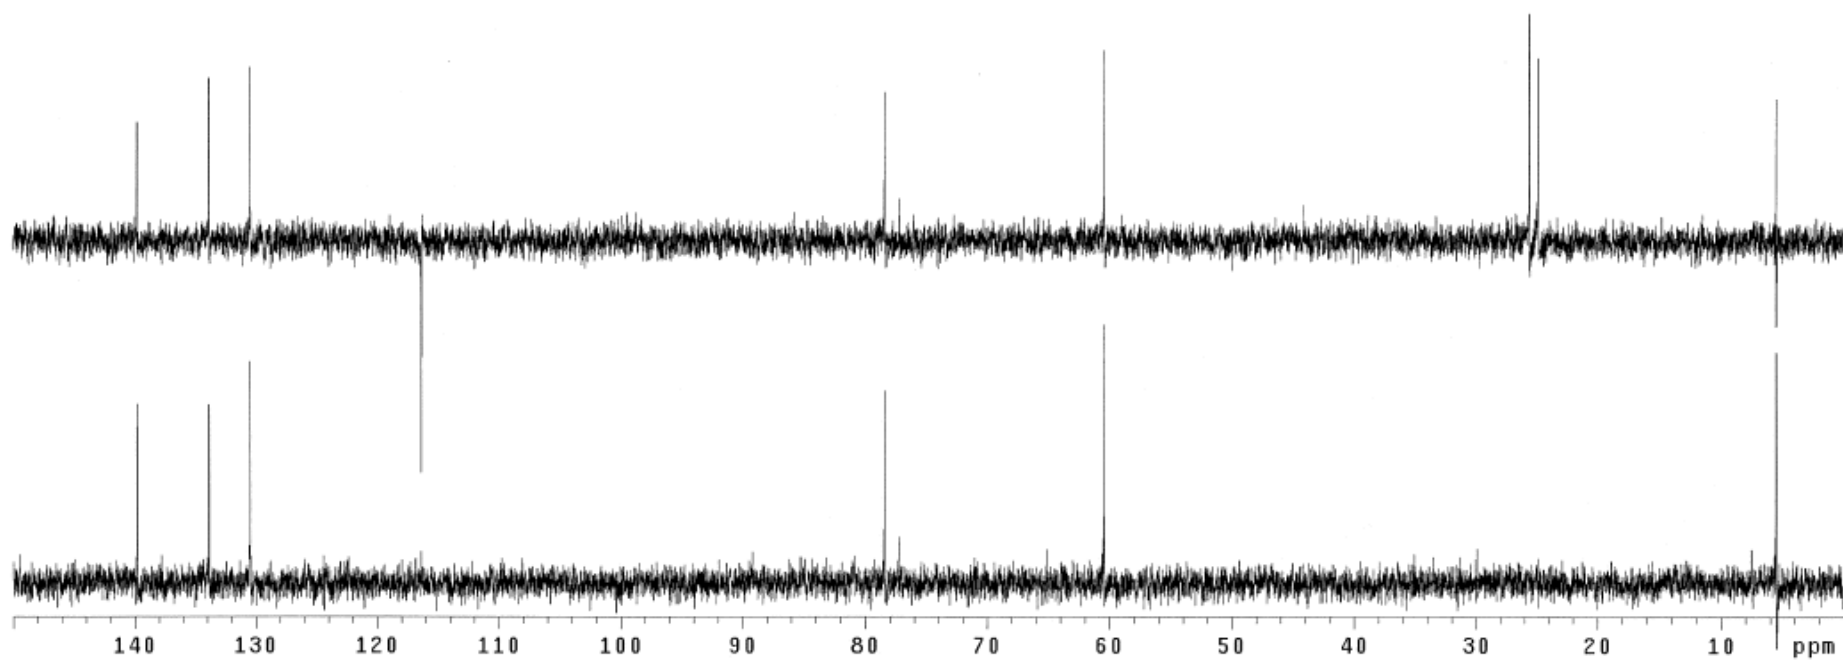

**Figure S5.** DEPT135 (upper) and DEPT90 (lower) spectra of **1** in CDCl<sub>3</sub>.



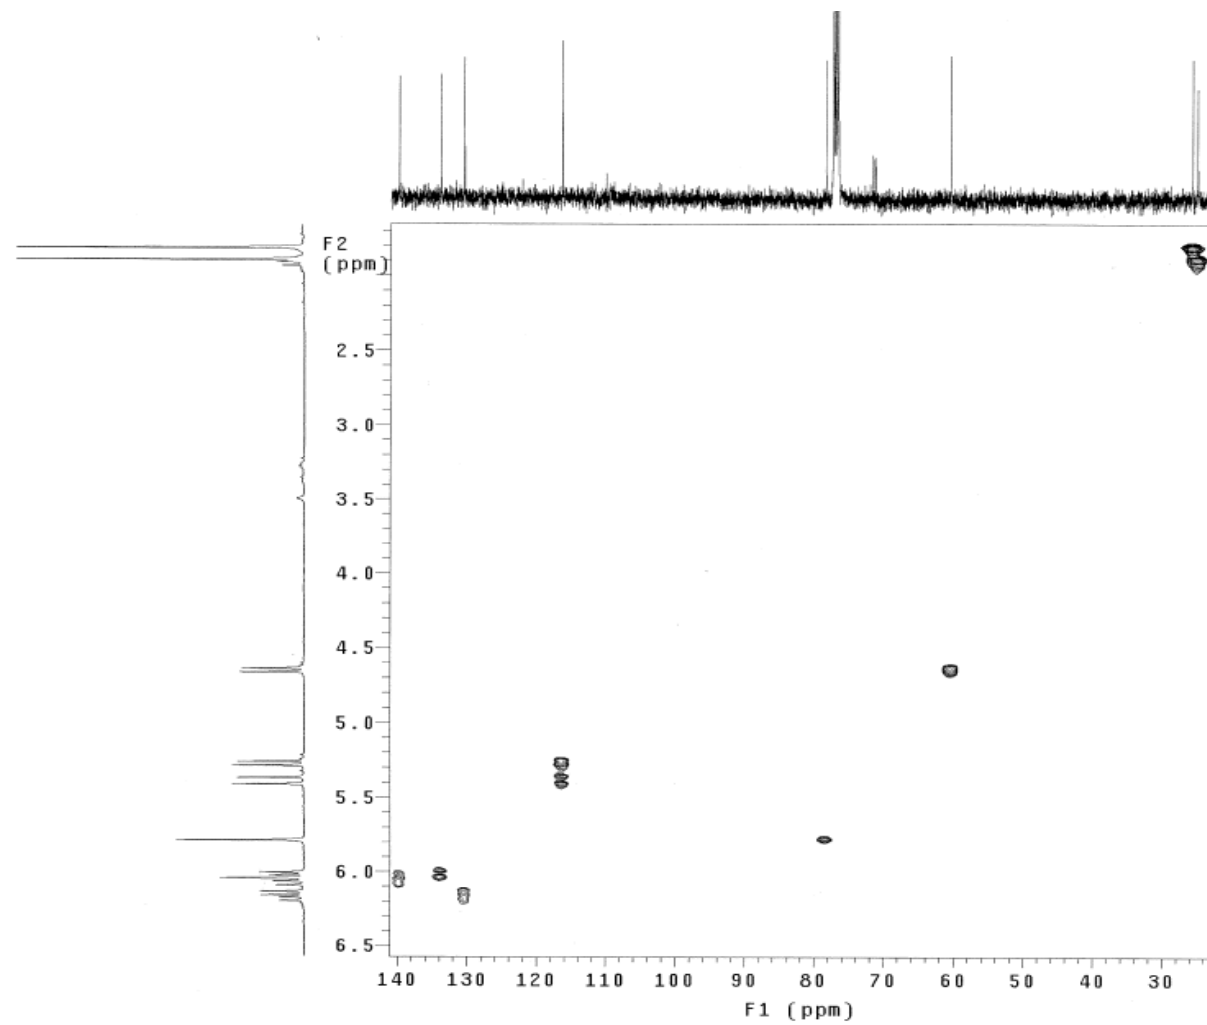

**Figure S6.** HSQC spectrum of **1** in  $\text{CDCl}_3$ .

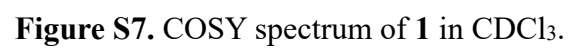

**Figure S7.** COSY spectrum of **1** in CDCl<sub>3</sub>.

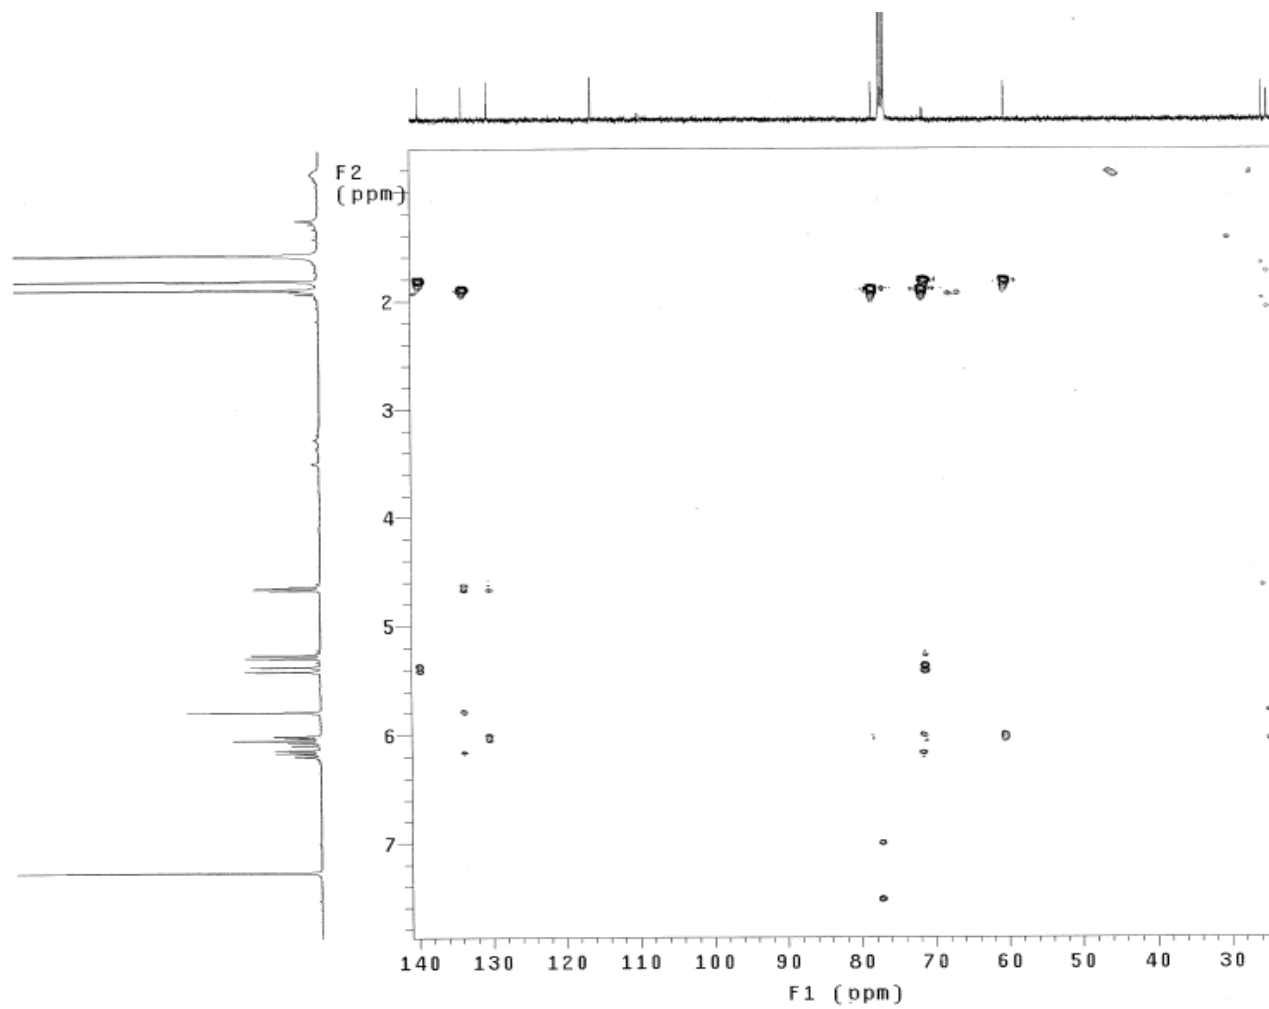

**Figure S8.** HMBC spectrum of **1** in  $\text{CDCl}_3$ .

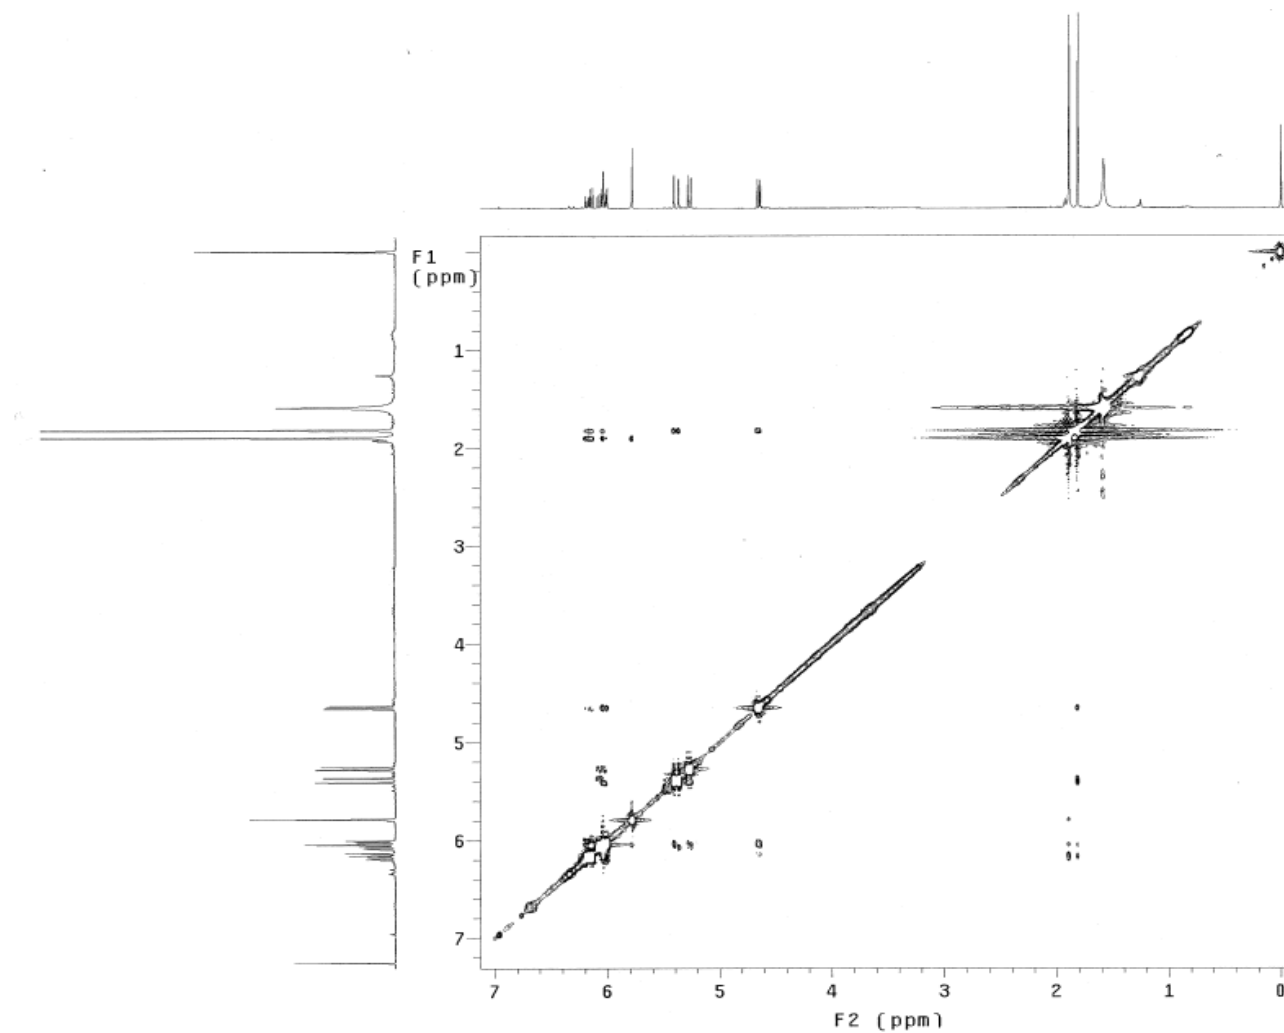

**Figure S9.** NOESY spectrum of **1** in CDCl<sub>3</sub>.

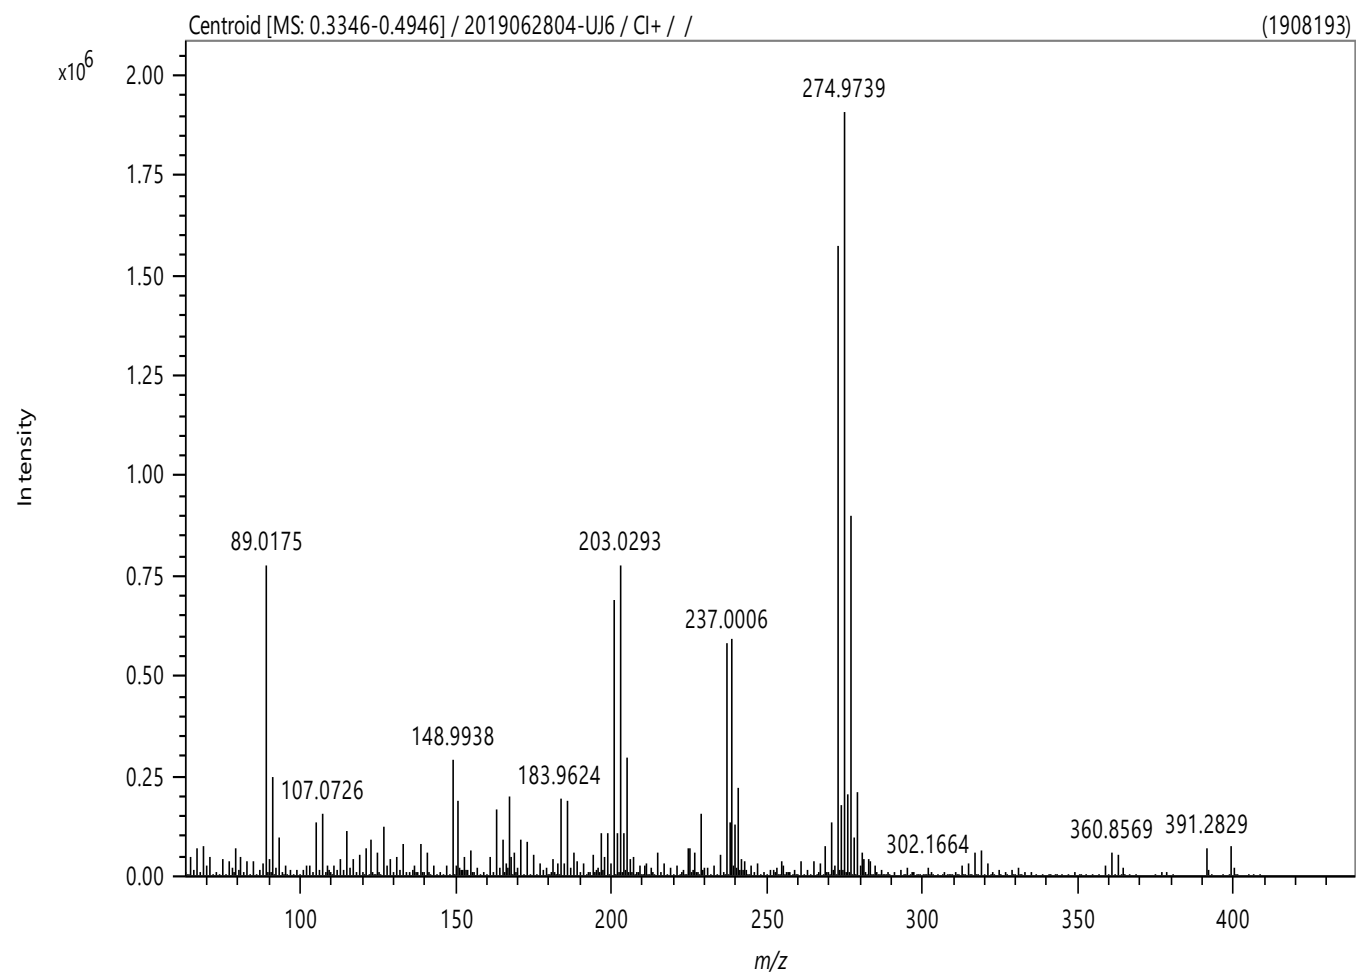

**Figure S10.** (+)-HRCIMS spectrum of **2**.

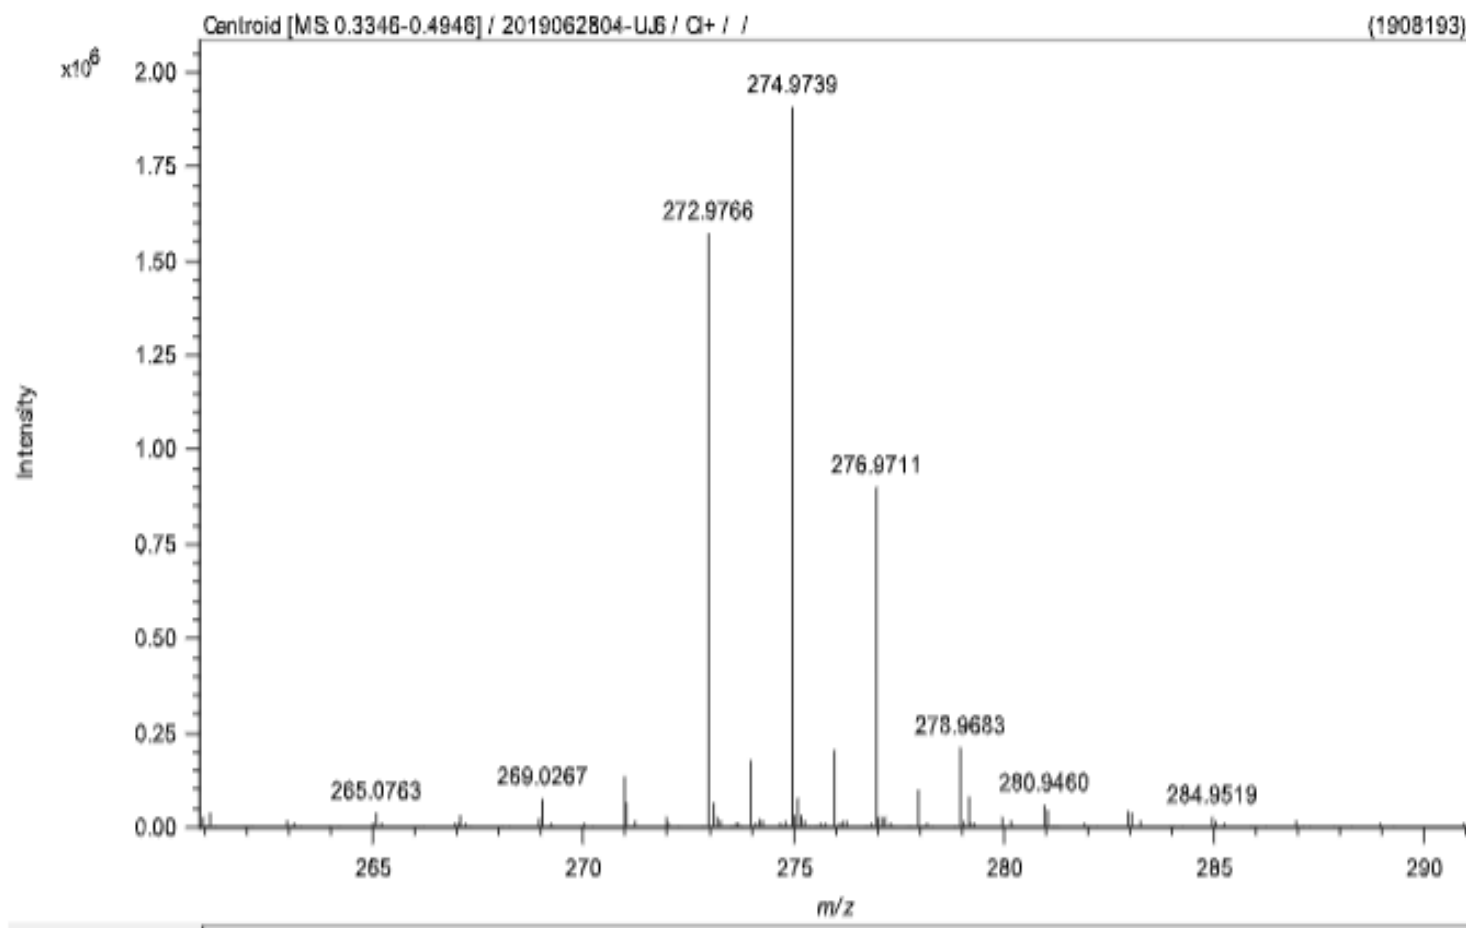

**Figure S11.** Enlarged (+)-HRCIMS spectrum of **2**.

UJ2-5-2

Sample Name:

UJ2-5-2

Data Collected on:

Varian-NMR-vnmrs400

Archive directory:

/home/sheu/vnmrsys/data

Sample directory:

UJ2-5-2\_20180620\_01

FidFile: PROTON\_01

Pulse Sequence: PROTON (s2pul)

Solvent: cdcl3

Data collected on: Jun 20 2018

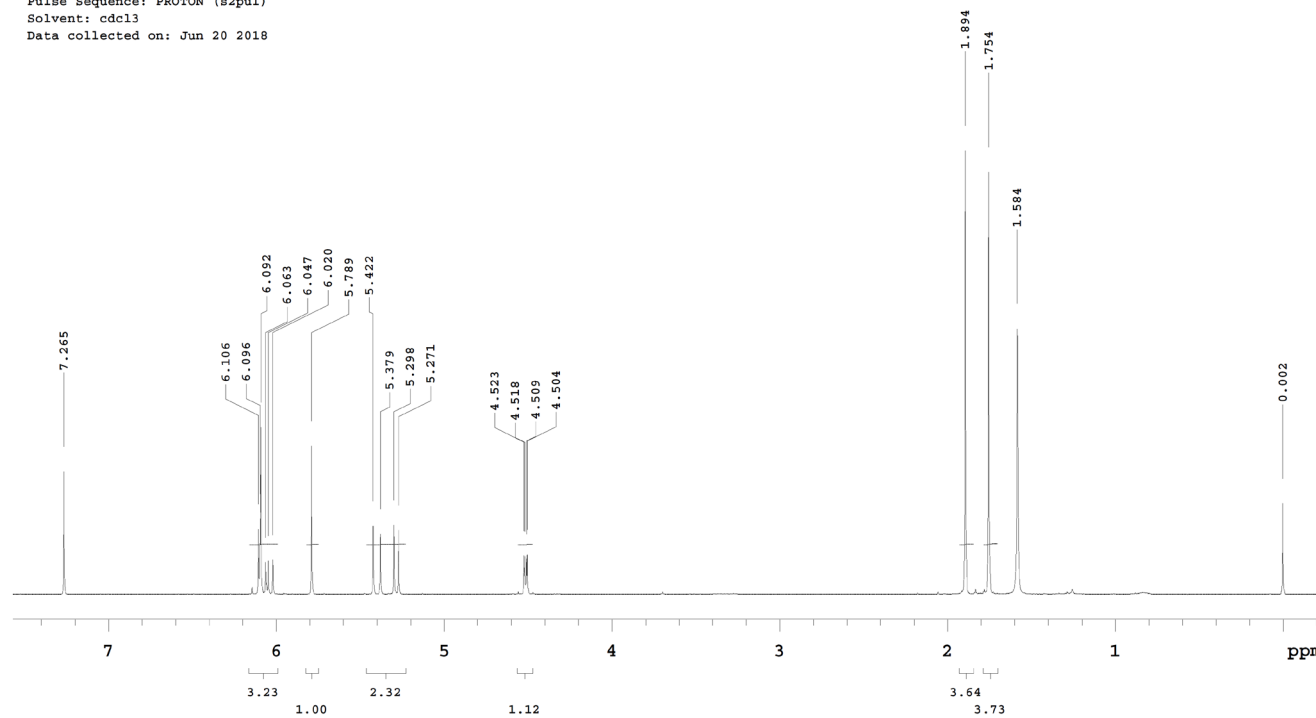

Figure S12.  $^1\text{H}$  NMR spectrum of **2** in  $\text{CDCl}_3$ .

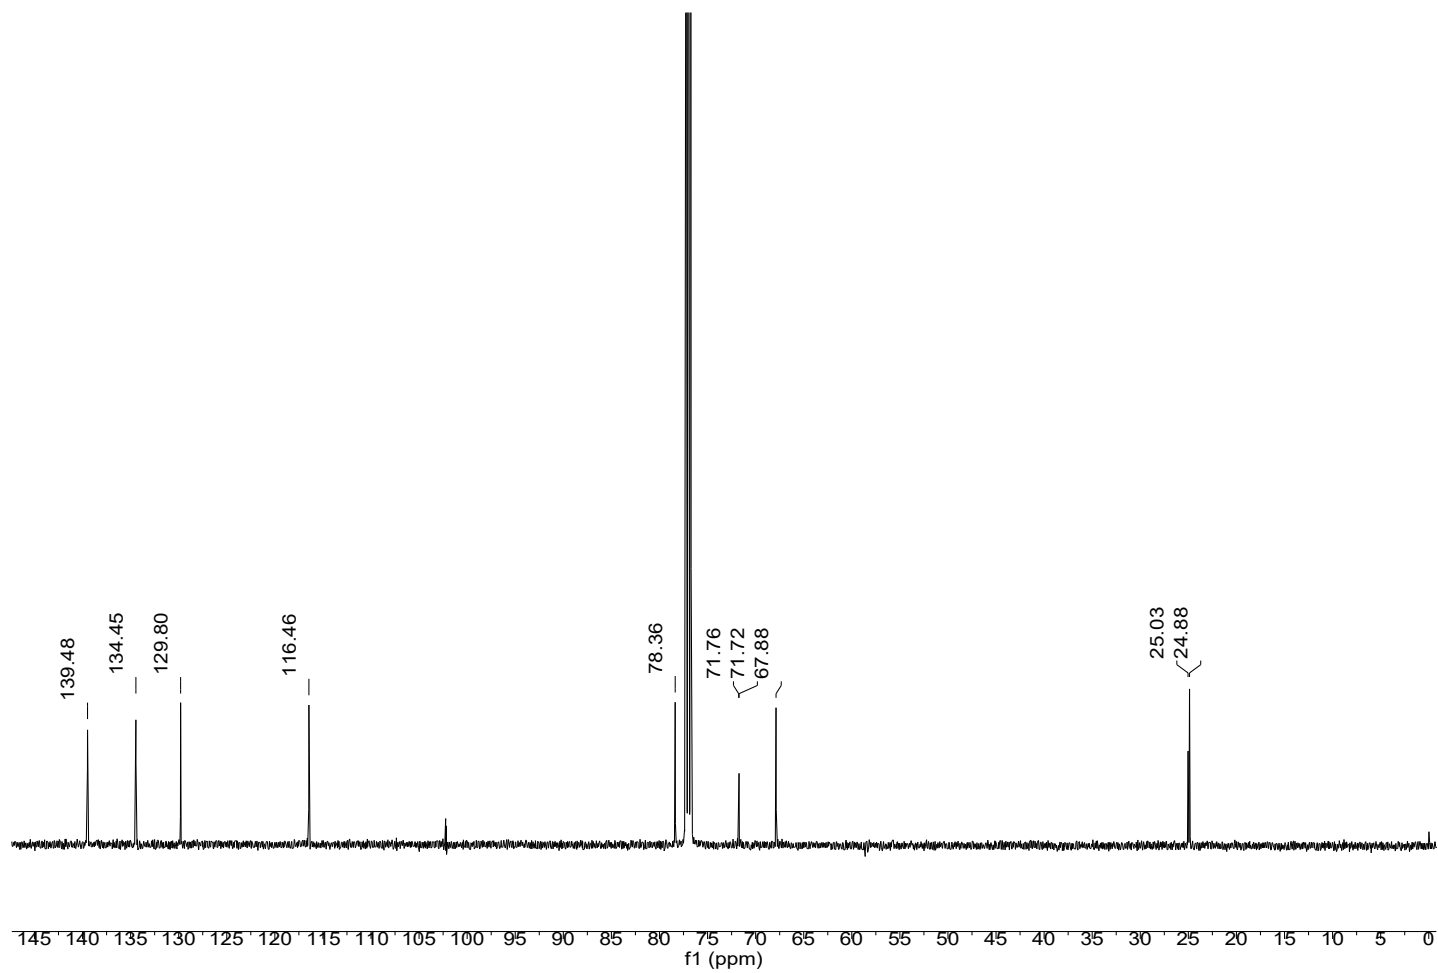

**Figure S13.** <sup>13</sup>C NMR spectrum of **2** in CDCl<sub>3</sub>.



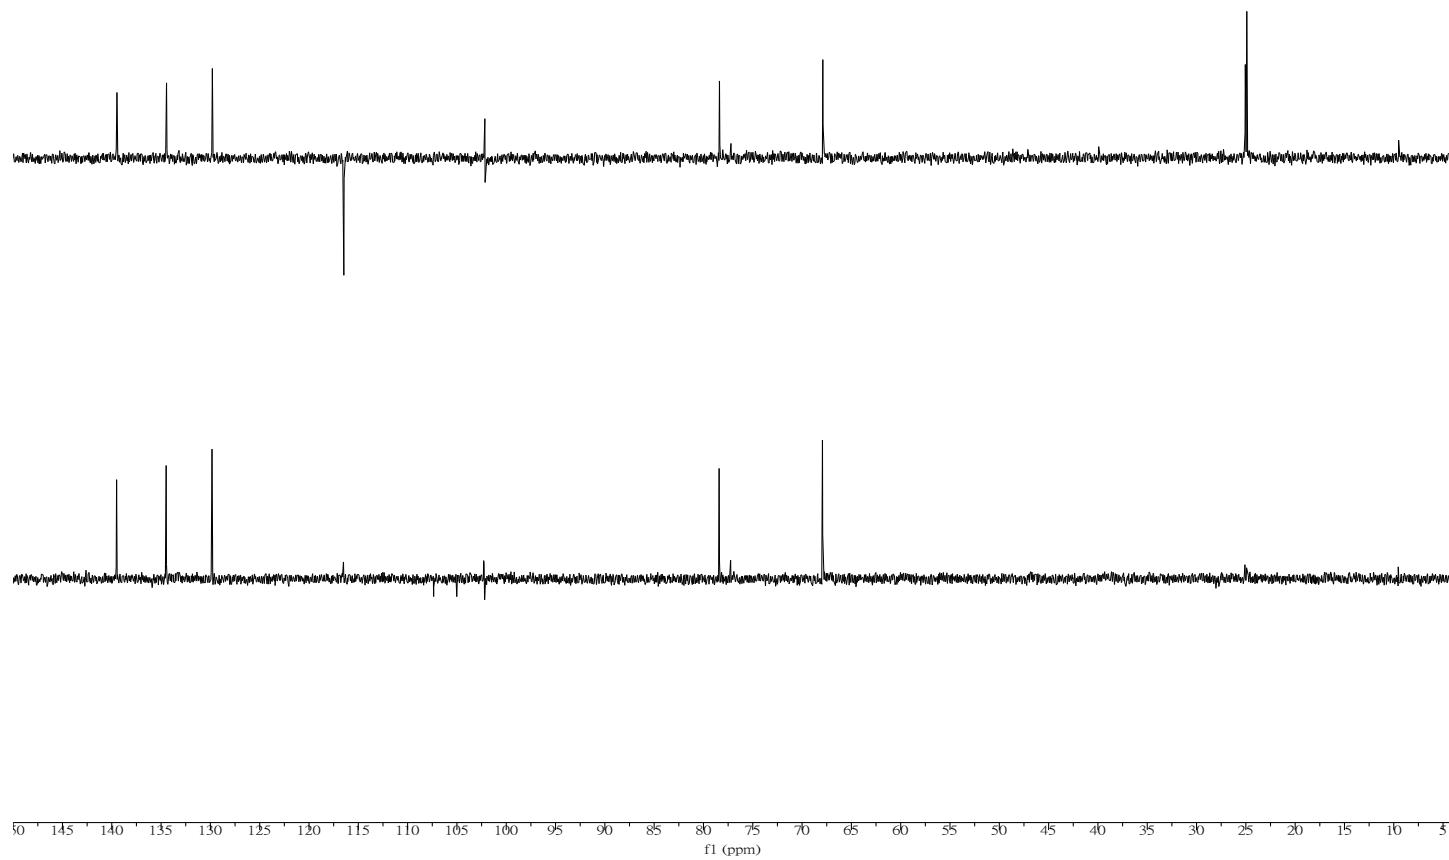

**Figure S14.** DEPT135 (upper) and DEPT90 (lower) spectra of **2** in CDCl<sub>3</sub>.

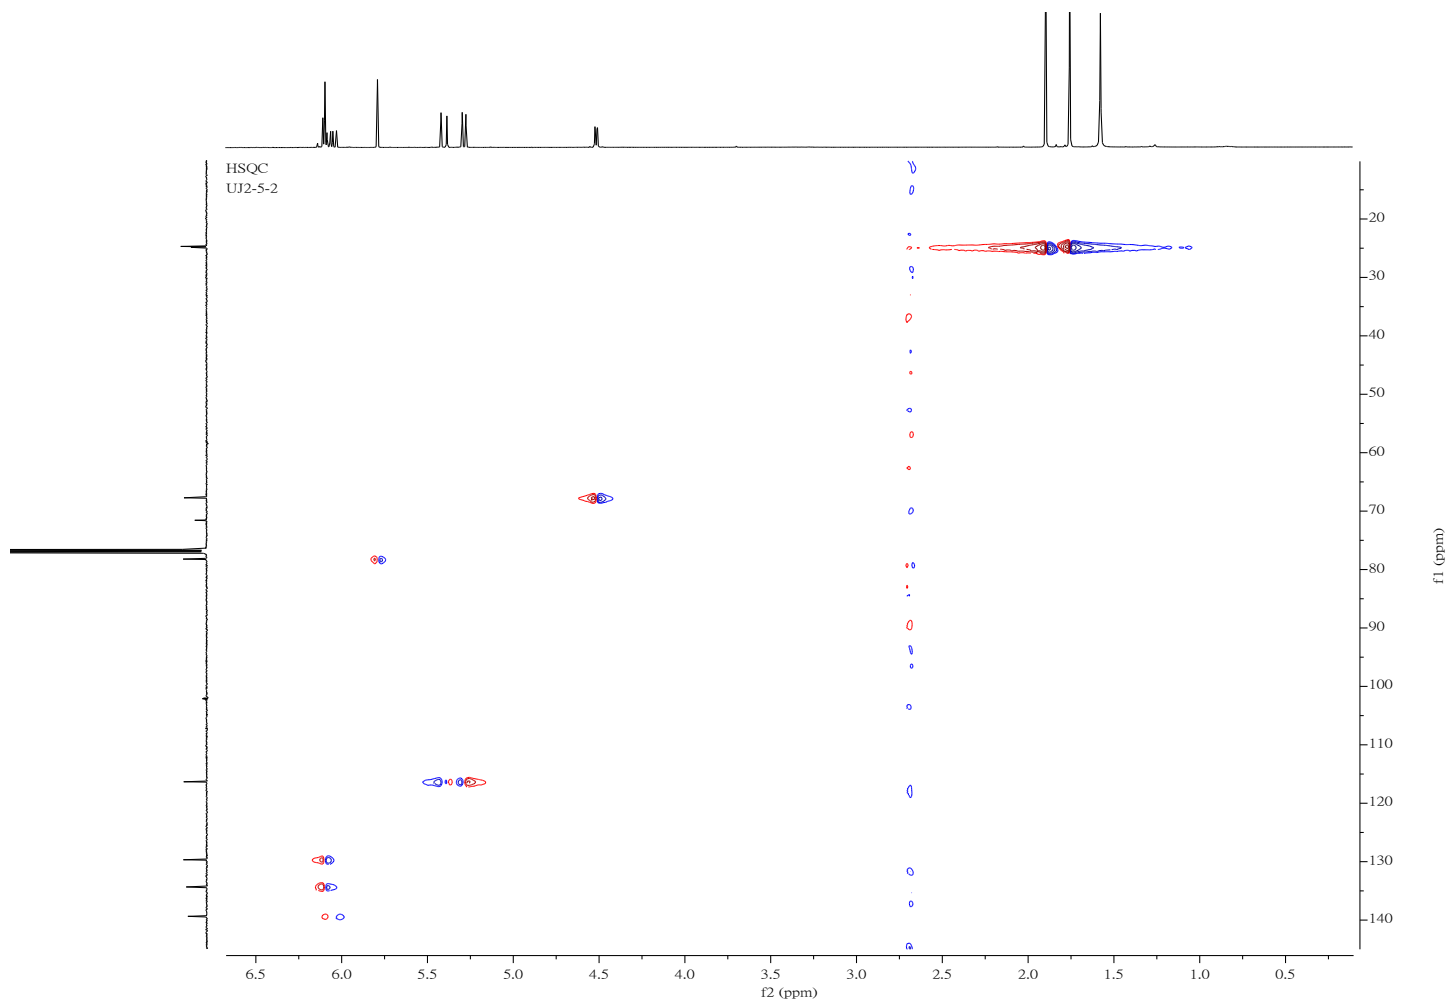

**Figure S15.** HSQC spectrum of **2** in  $\text{CDCl}_3$ .

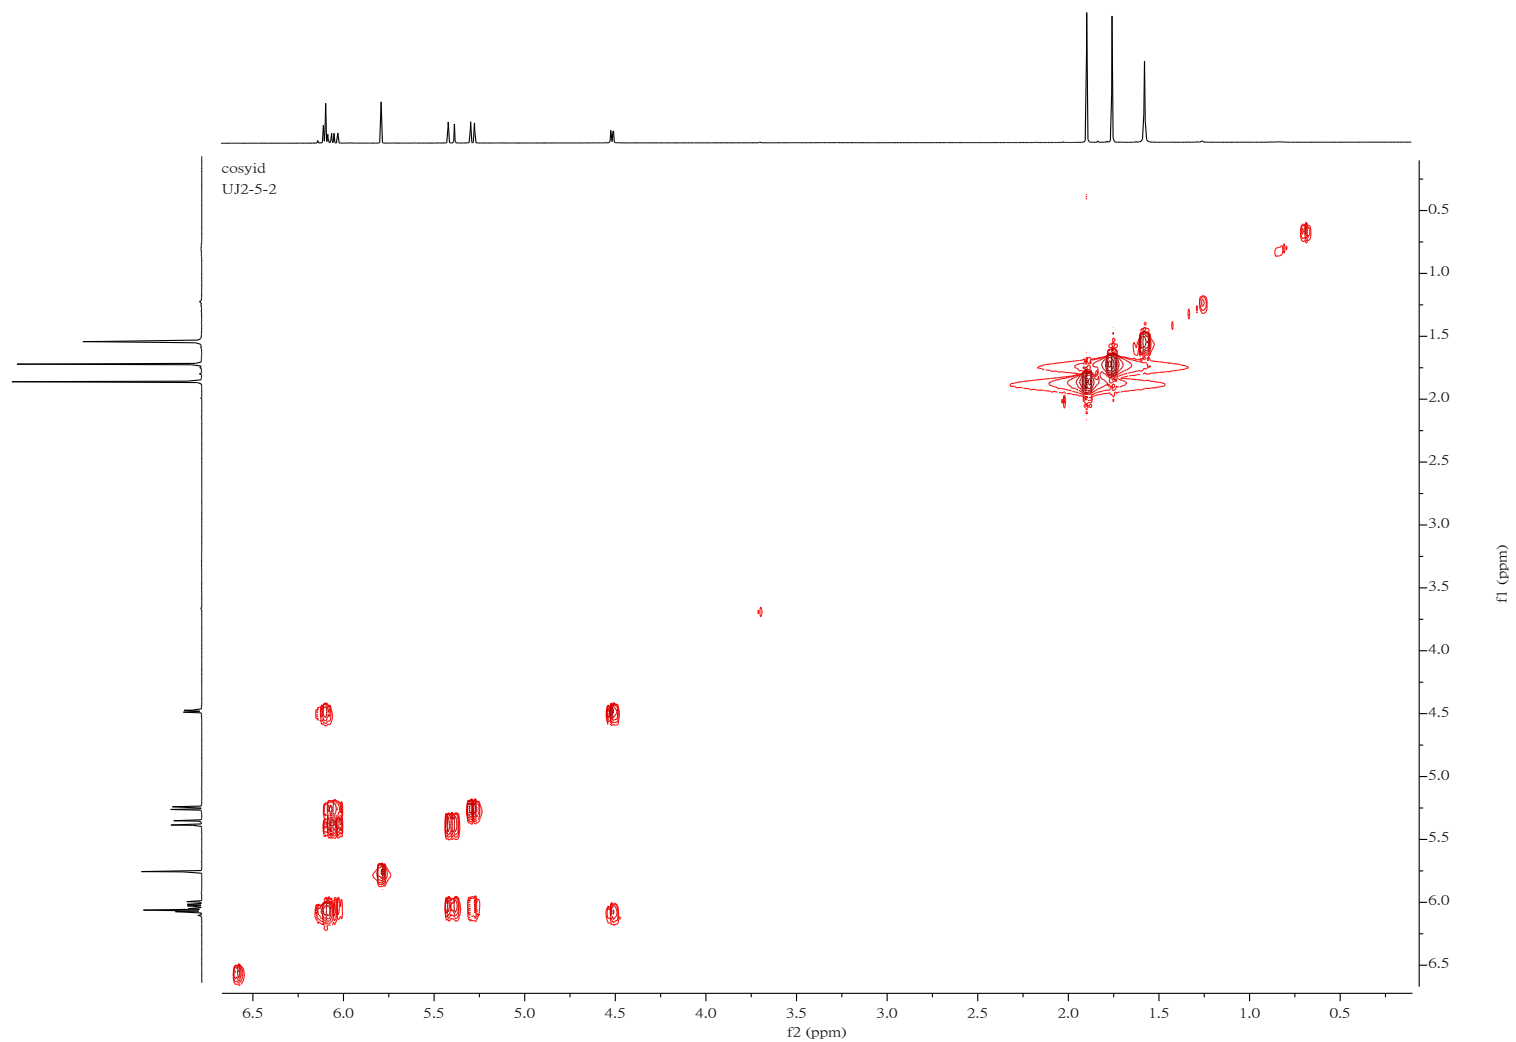

**Figure S16.** COSY spectrum of **2** in CDCl<sub>3</sub>.

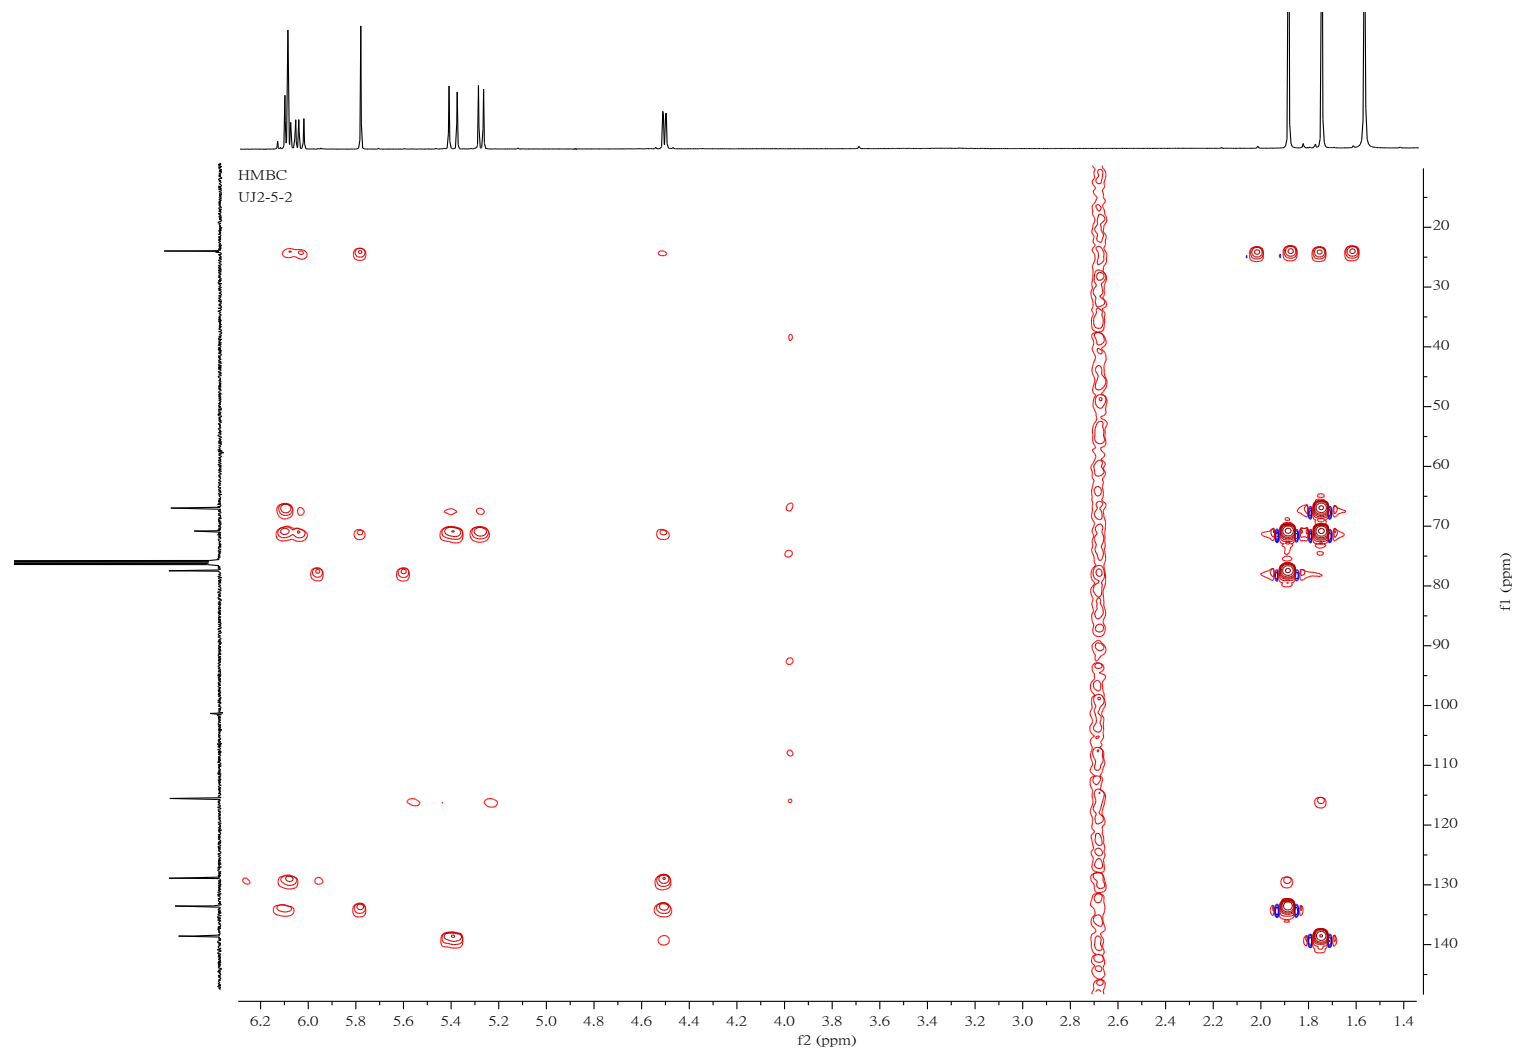

**Figure S17.** HMBC spectrum of **2** in  $\text{CDCl}_3$ .

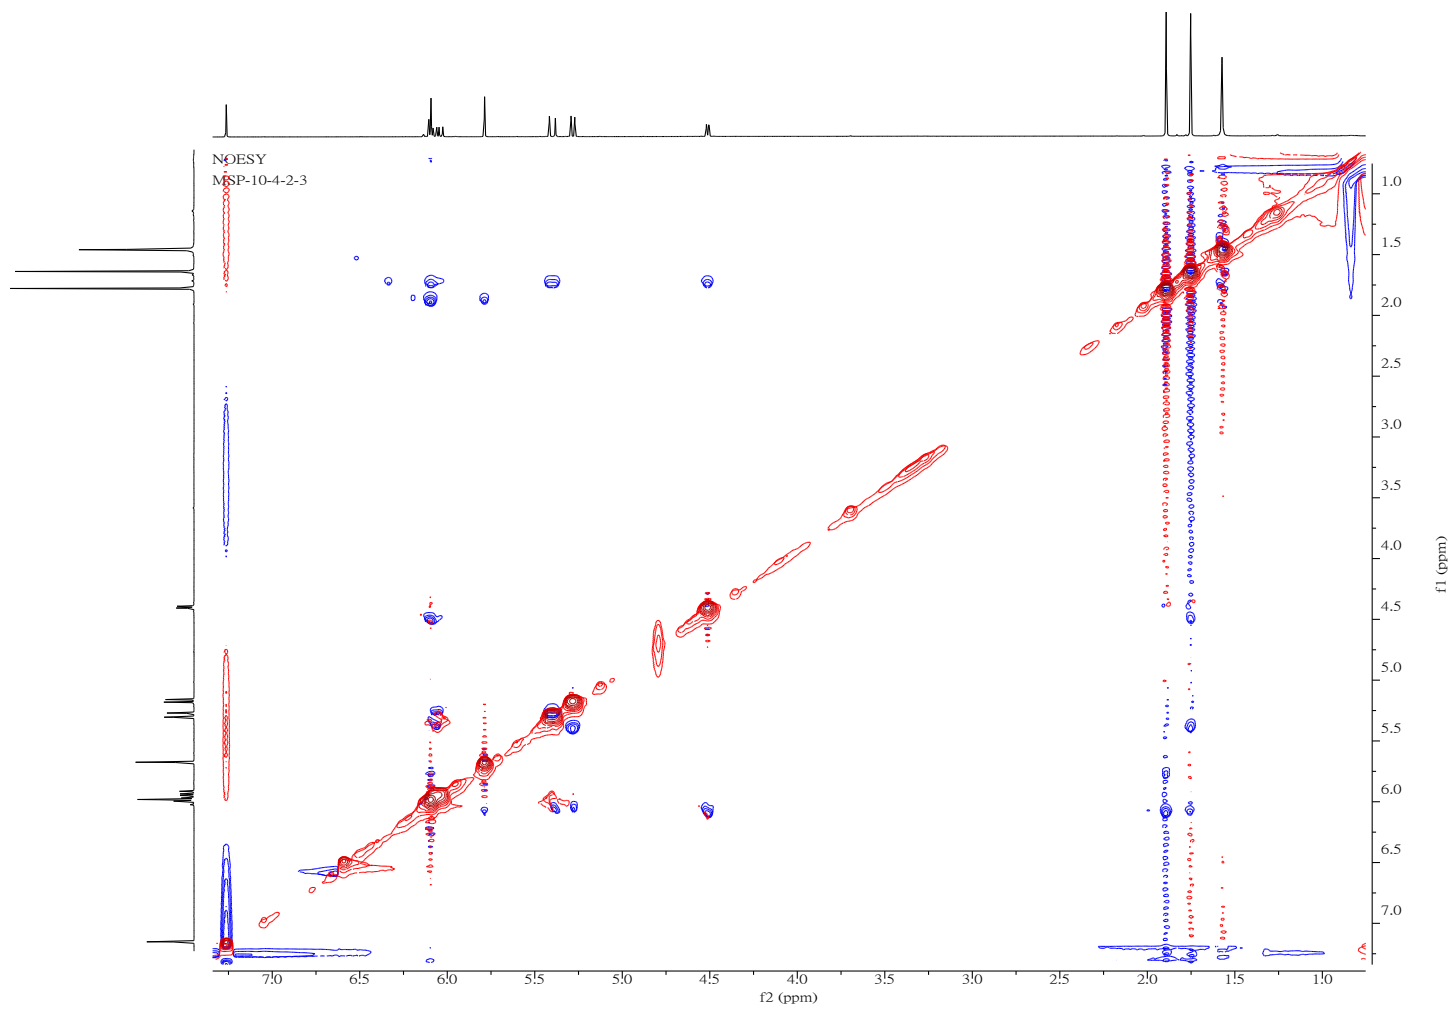

**Figure S18.** NOESY spectrum of **2** in  $\text{CDCl}_3$ .

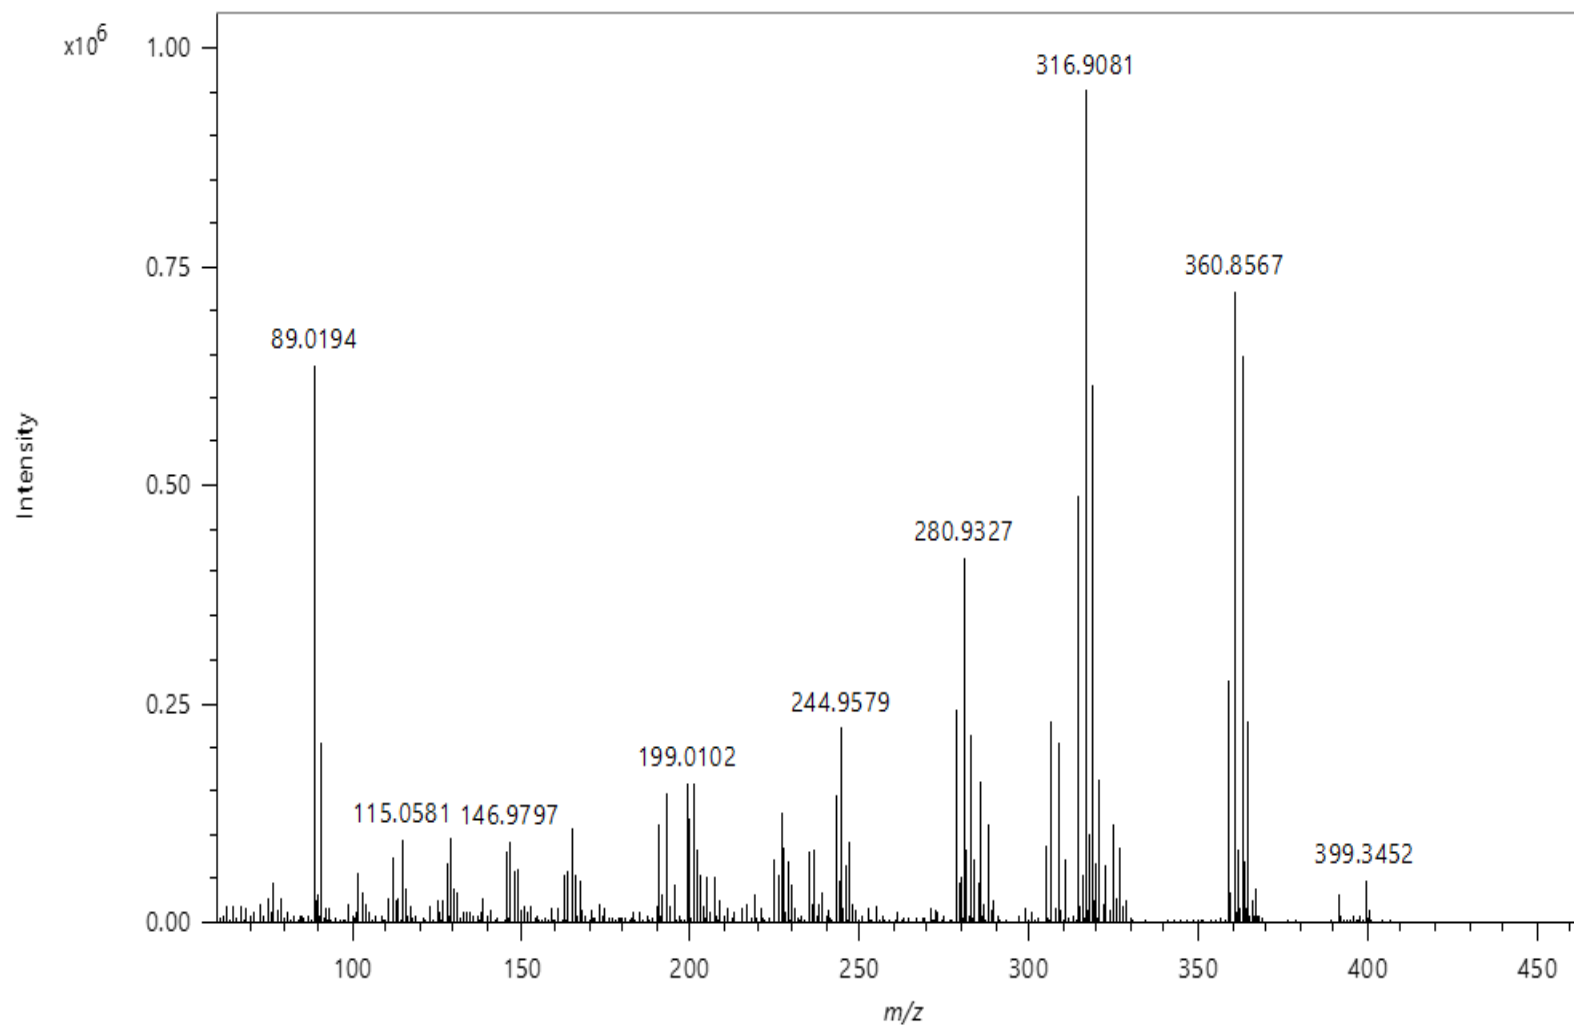

**Figure S19.** (+)-HRCIMS spectrum of **3**.

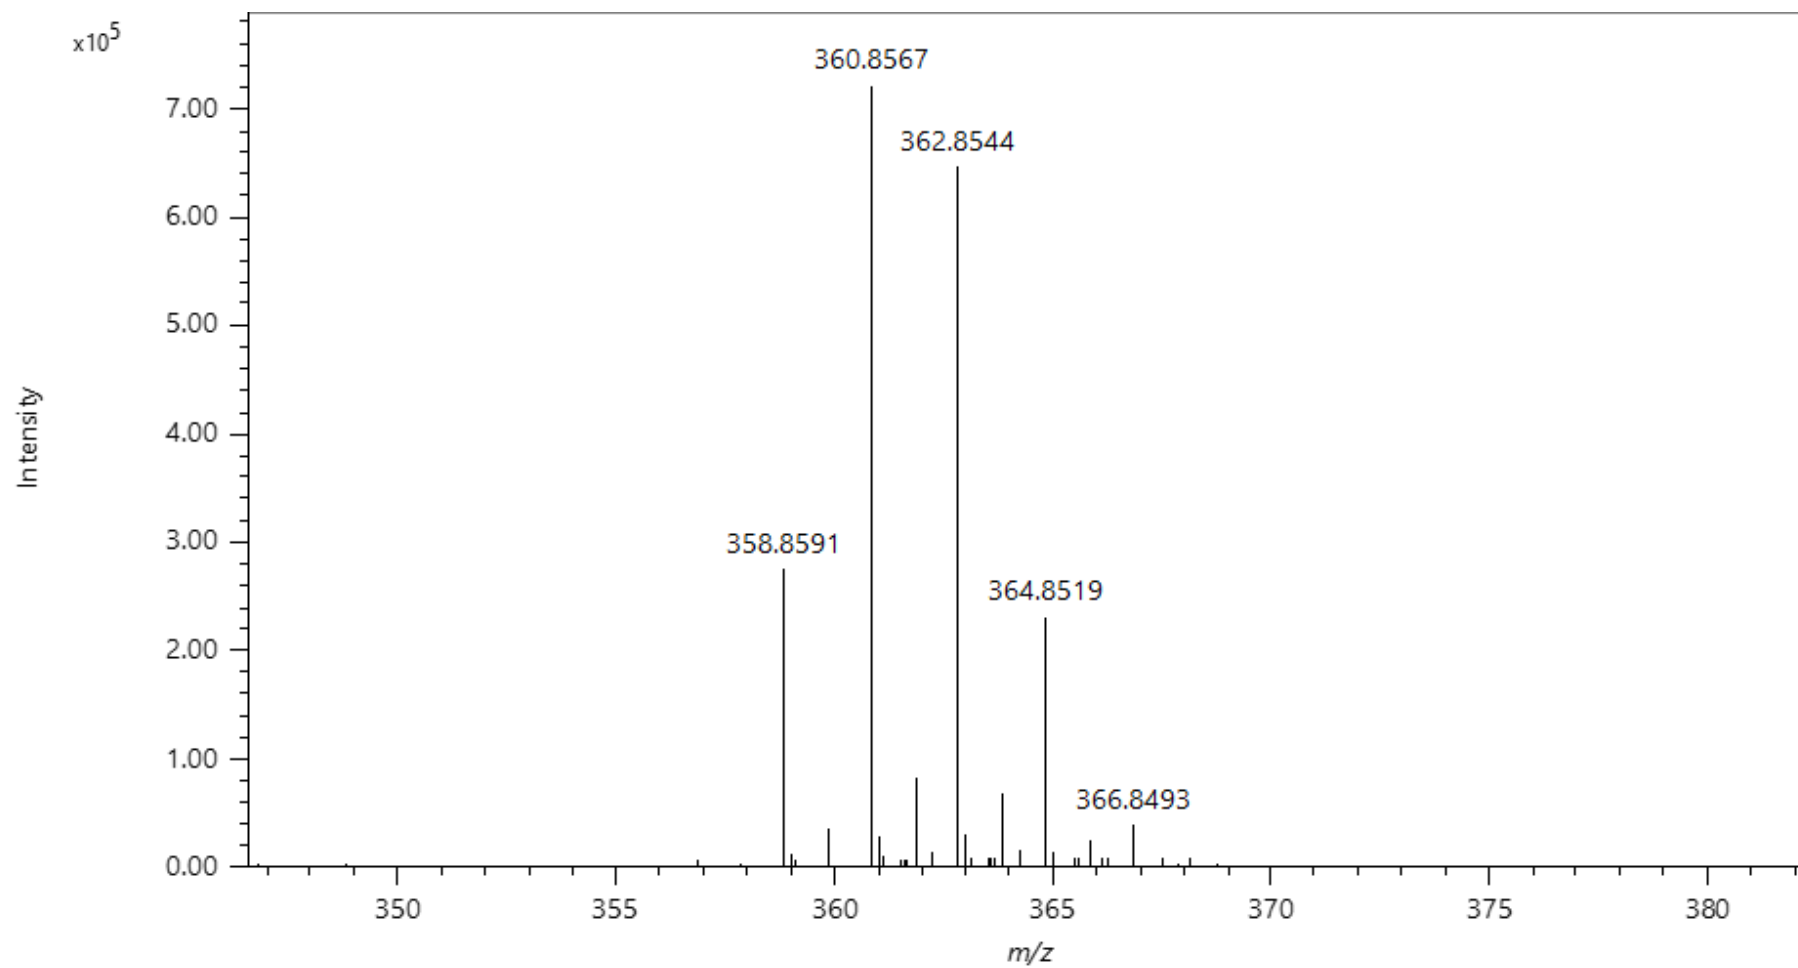

**Figure S20.** Enlarged (+)-HRCIMS spectrum of **3**.

UJ1-2-4-1

Sample Name:  
UJ1-2-4-1  
Data Collected on:  
Varian-NMR-vnmrs400  
Archive directory:  
/home/sheu/vnmrsys/data  
Sample directory:  
UJ1-2-4-1\_20180116\_01  
FidFile: PROTON\_02

Pulse Sequence: PROTON (s2pul)  
Solvent: cdcl3  
Data collected on: Jan 16 2018

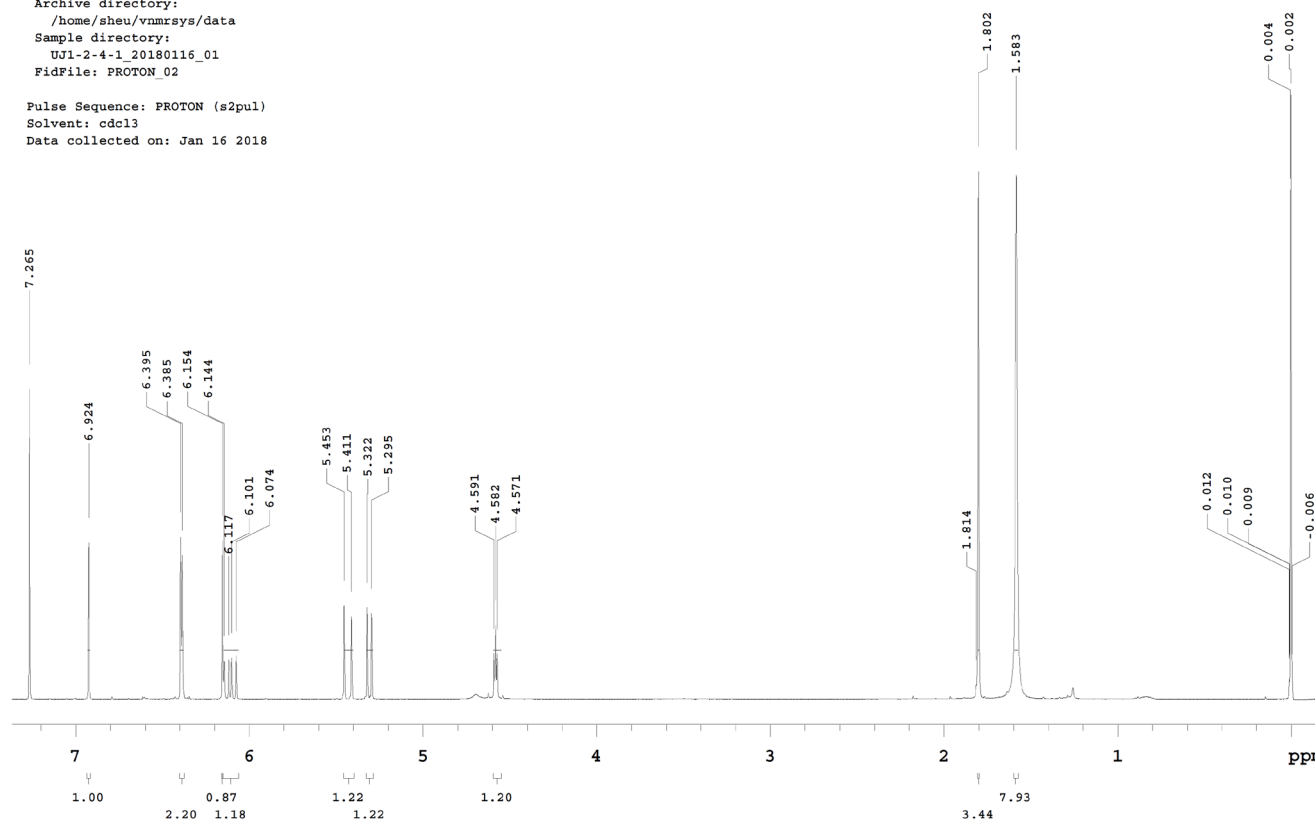

**Figure S21.**  $^1\text{H}$  NMR spectrum of **3** in  $\text{CDCl}_3$ .



UJ1-2-4-1

Sample Name:

UJ1-2-4-1

Data Collected on:

Varian-NMR-vnmrs400

Archive directory:

/home/sheu/vnmrsys/data

Sample directory:

UJ1-2-4-1\_20180116\_01

FidFile: CARBON\_01

Pulse Sequence: CARBON (s2pul)

Solvent: cdcl3

Data collected on: Jan 16 2018

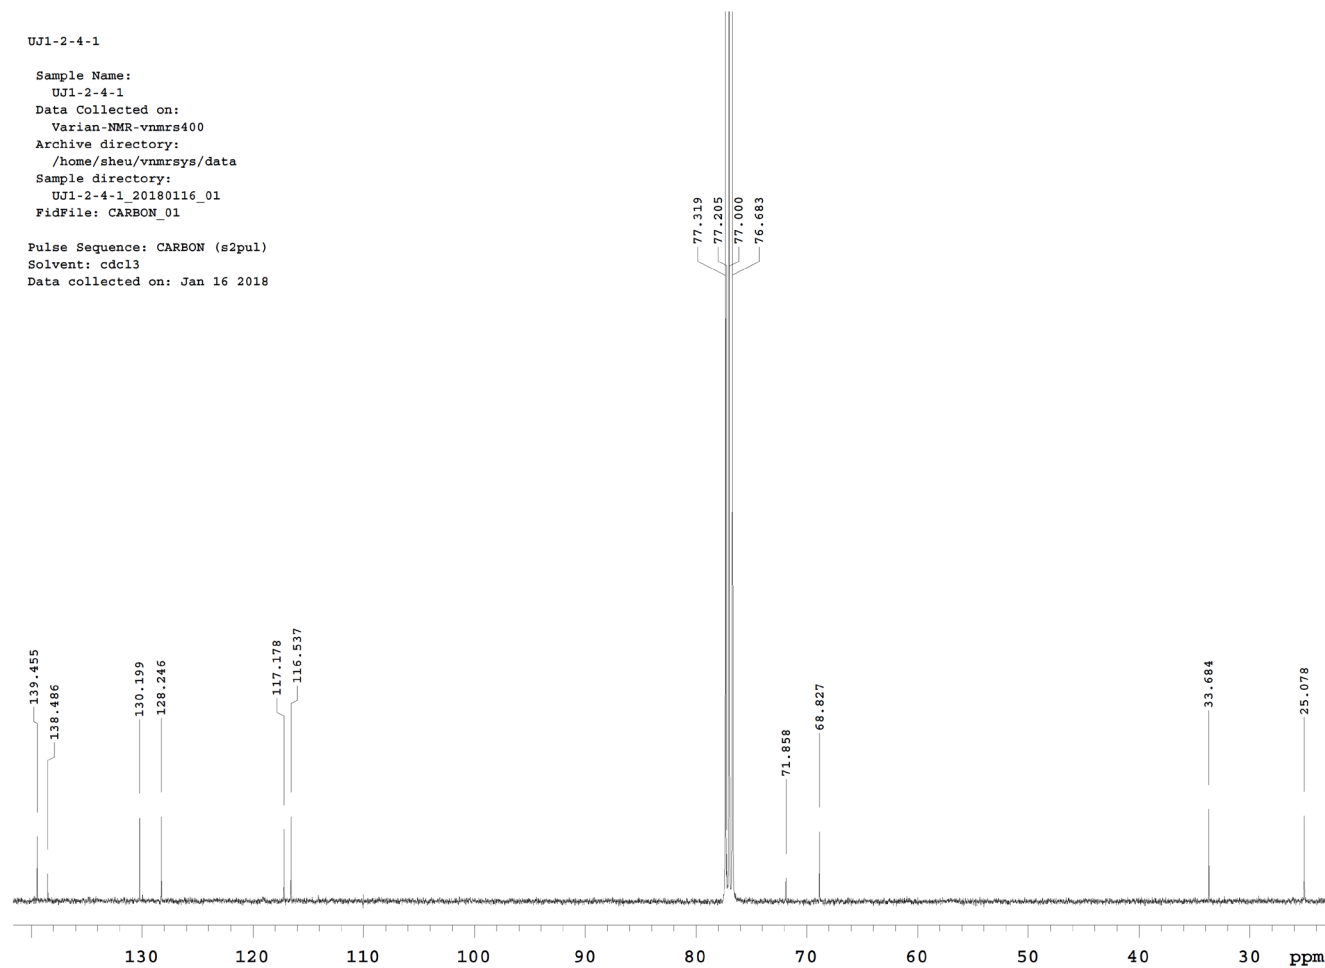

**Figure S22.**  $^{13}\text{C}$  NMR spectrum of **3** in  $\text{CDCl}_3$ .

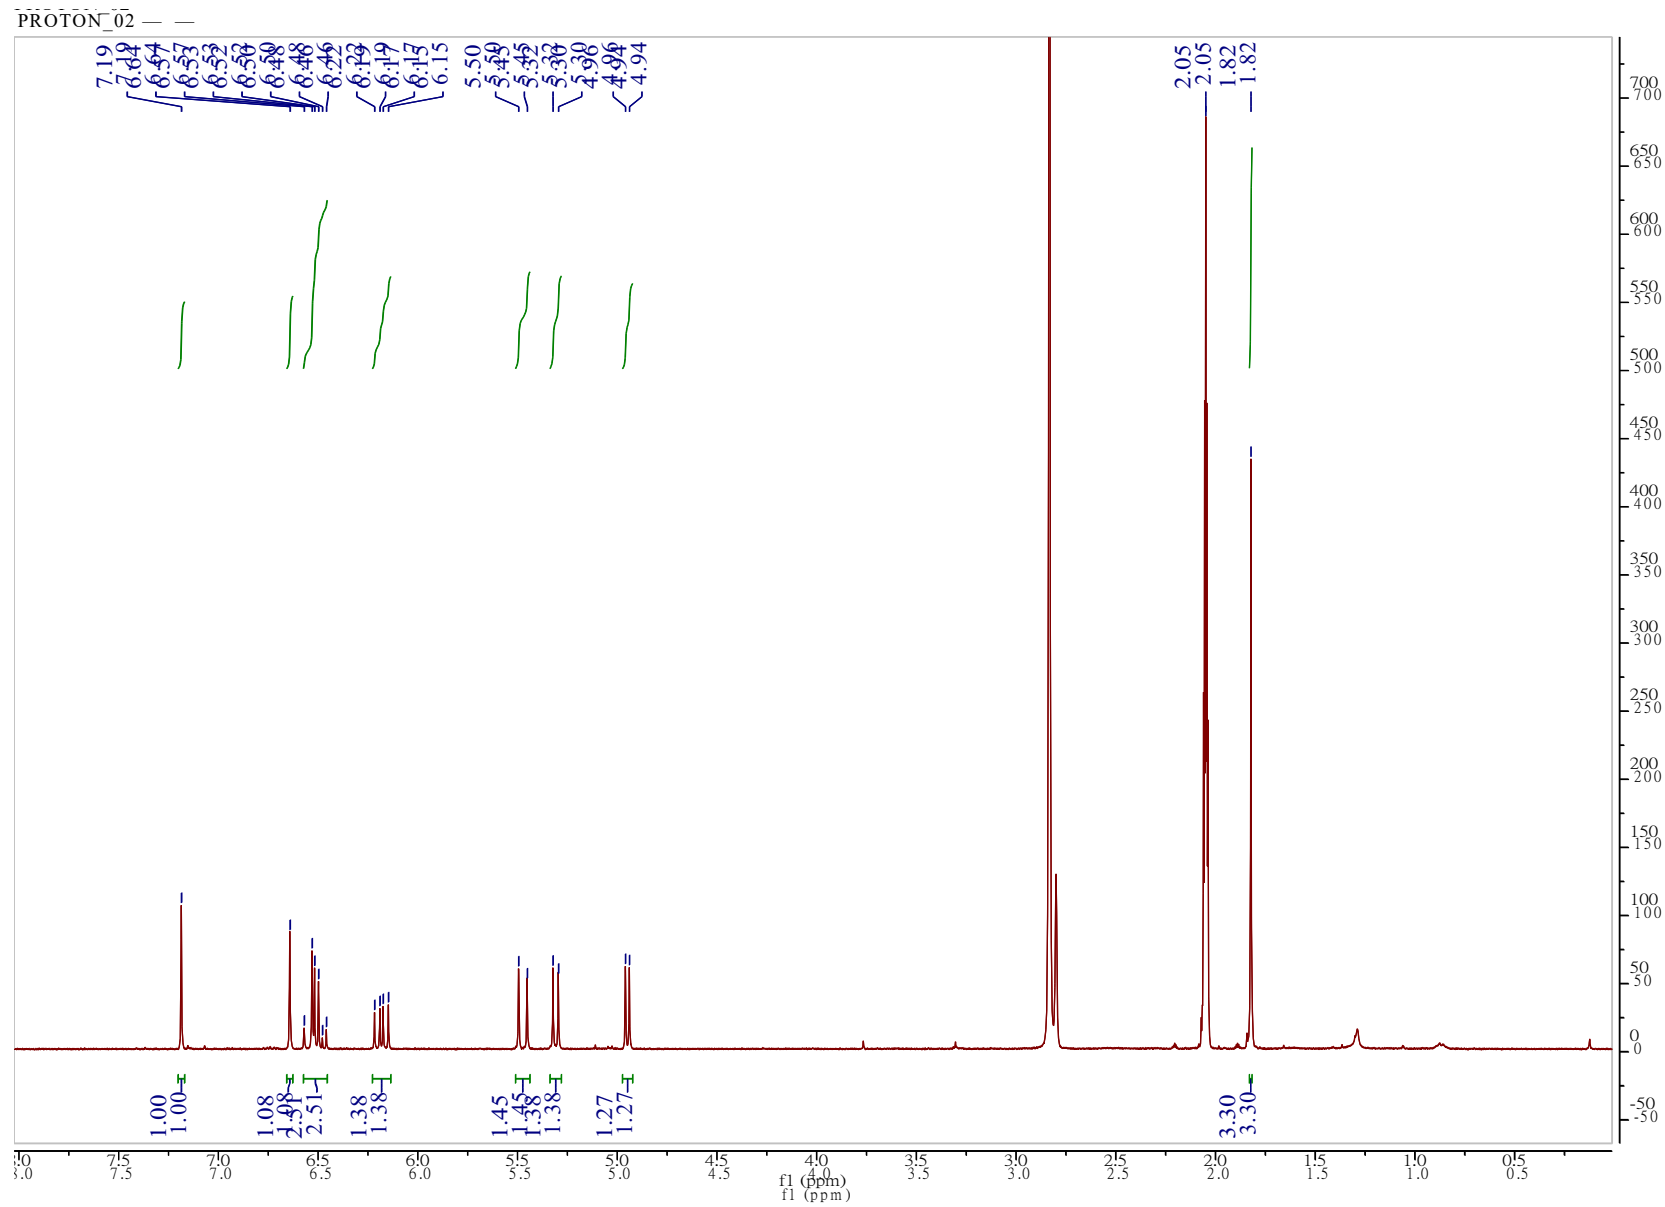

Figure S23.  $^1\text{H}$  NMR spectrum of **3** in acetone- $d_6$ .

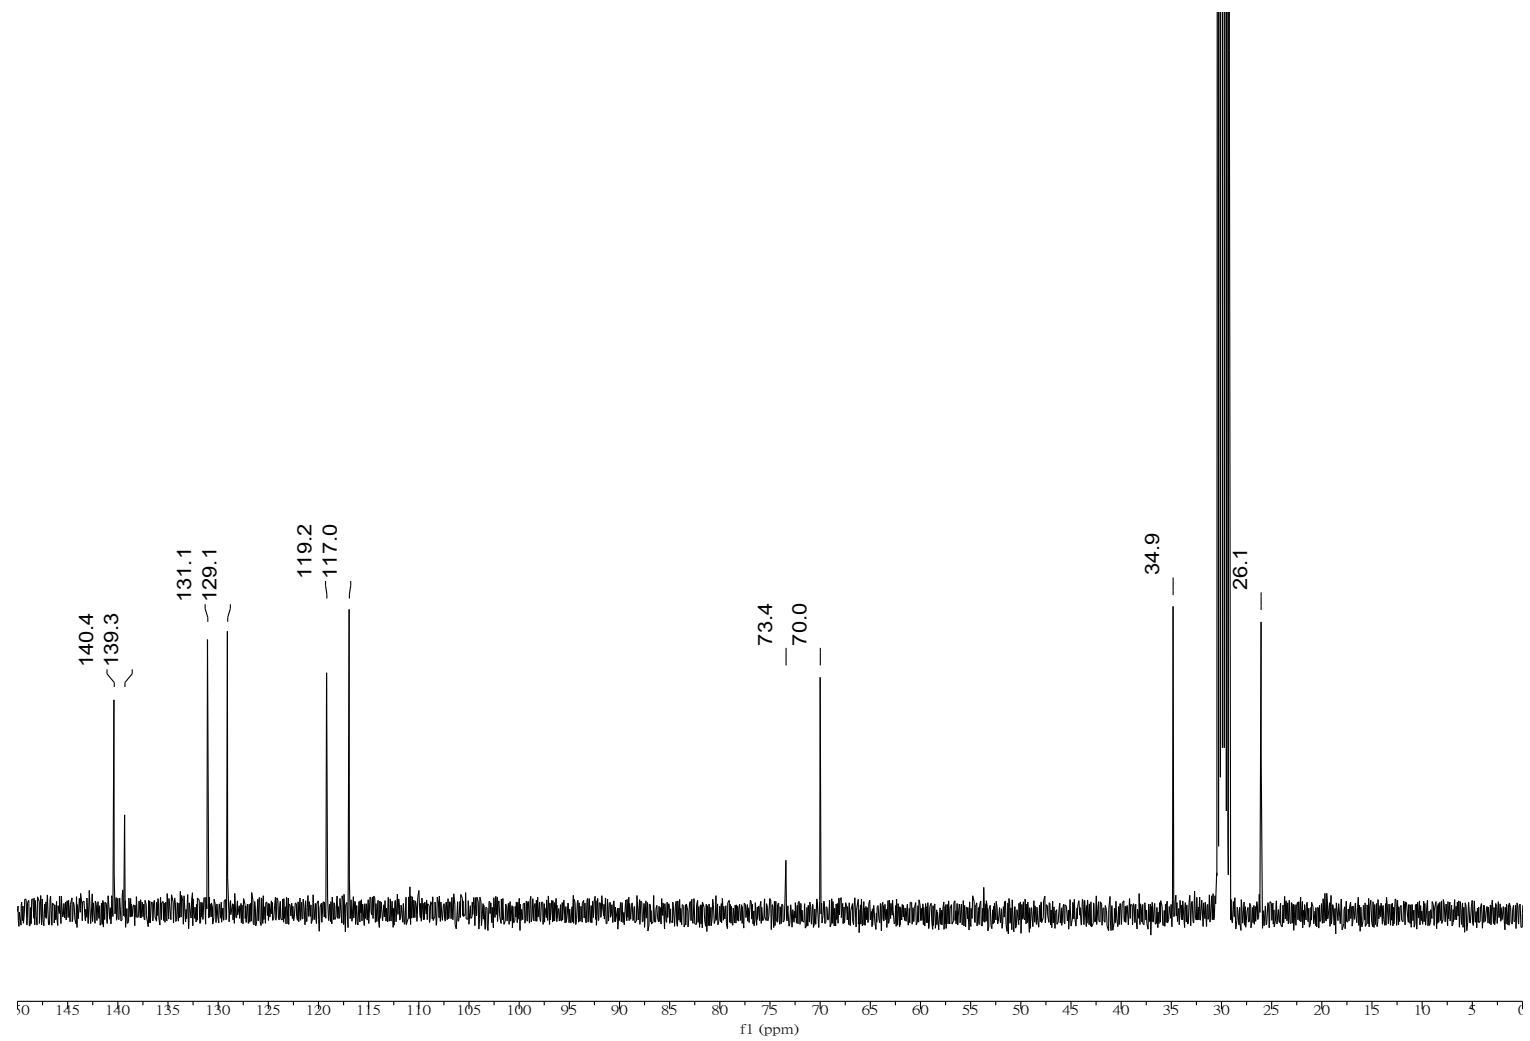

**Figure S24.**  $^{13}\text{C}$  NMR spectrum of **3** in  $\text{acetone-}d_6$ .

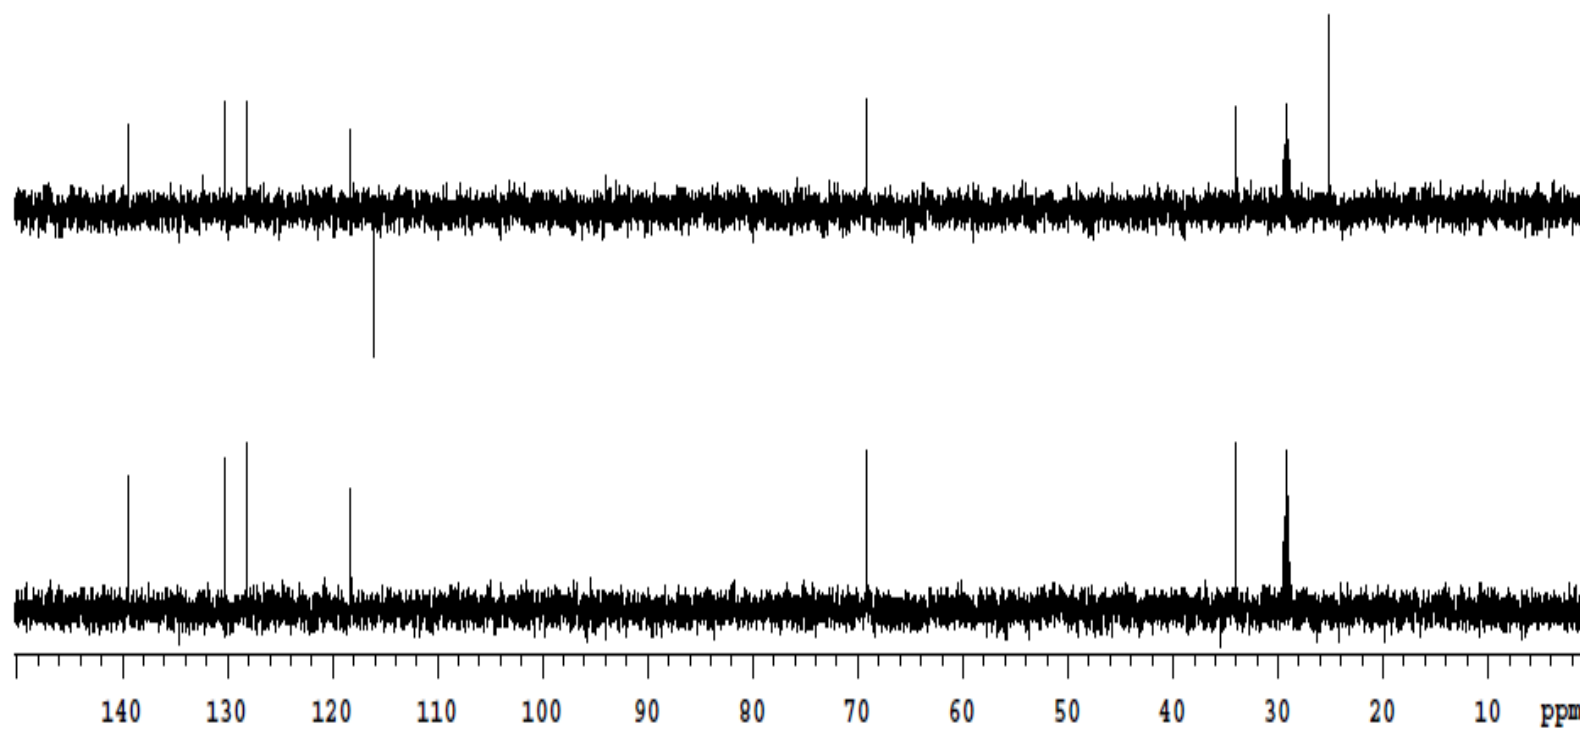

**Figure S25.** DEPT135 (upper) and DEPT90 (lower) spectra of **3** in acetone-*d*<sub>6</sub>.

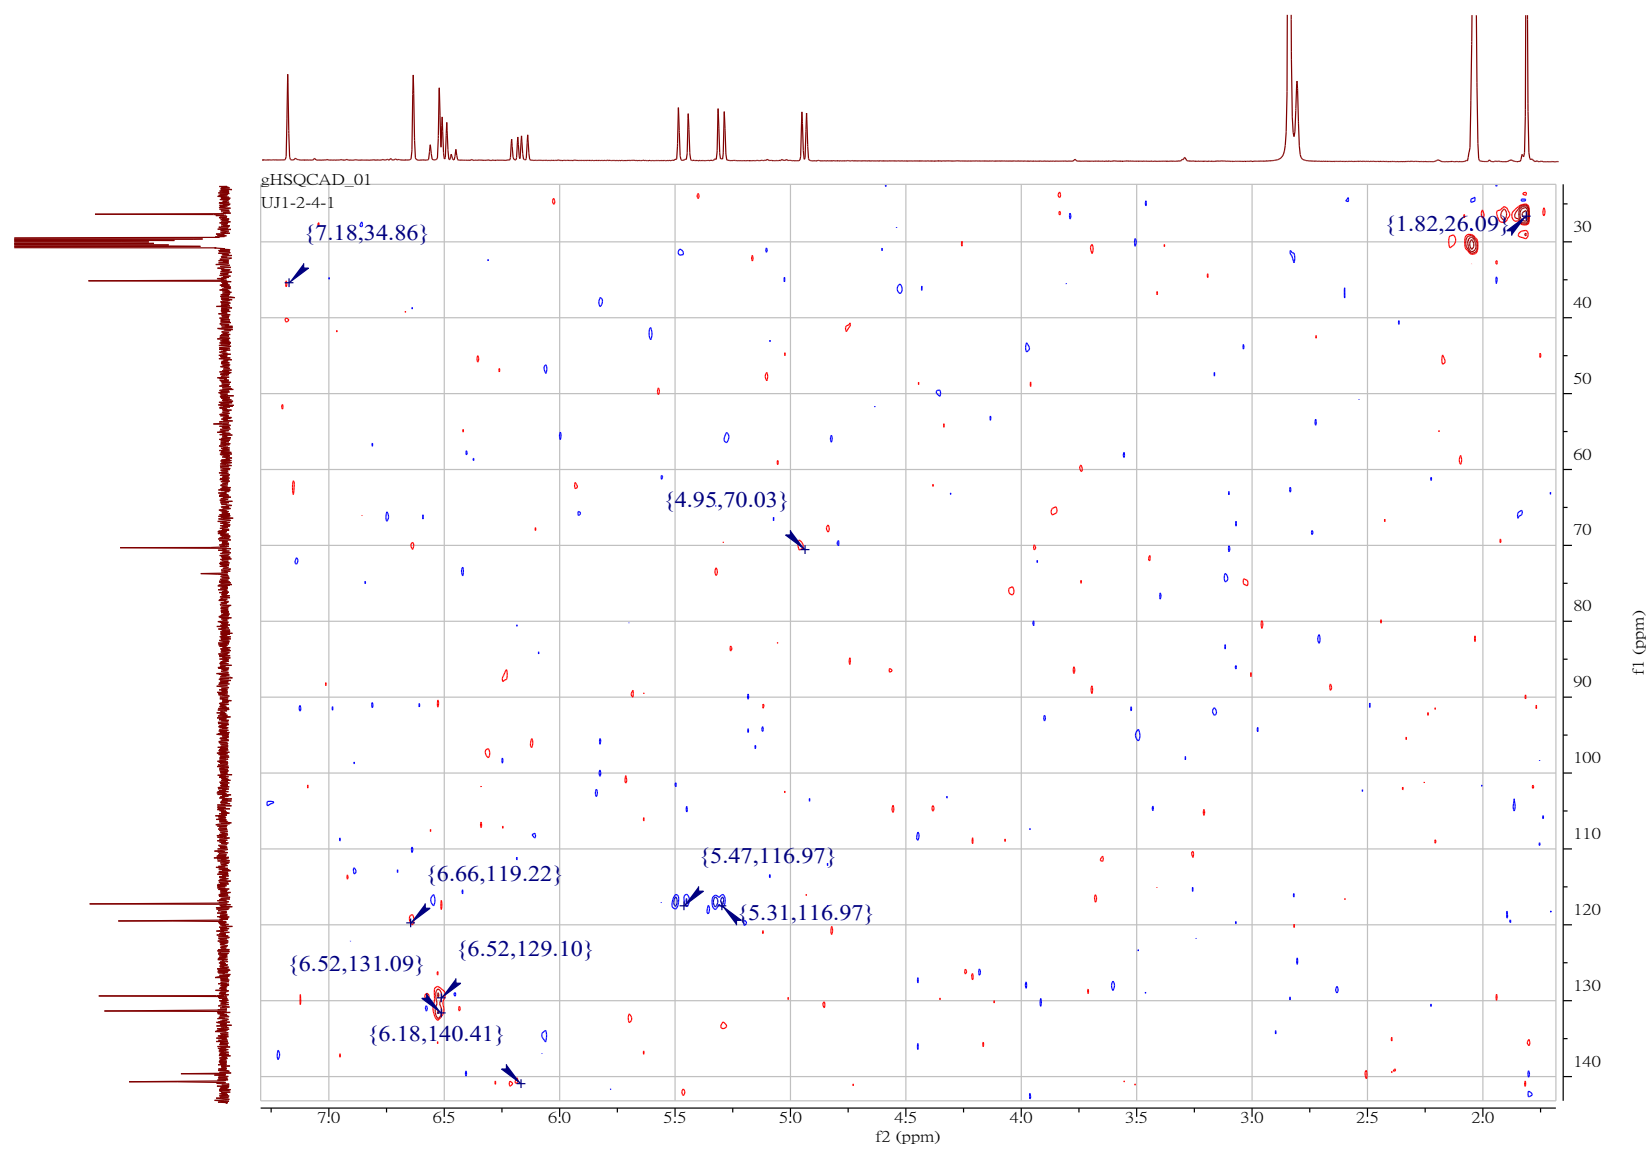

**Figure S26.** HSQC spectrum of **3** in acetone-*d*<sub>6</sub>.

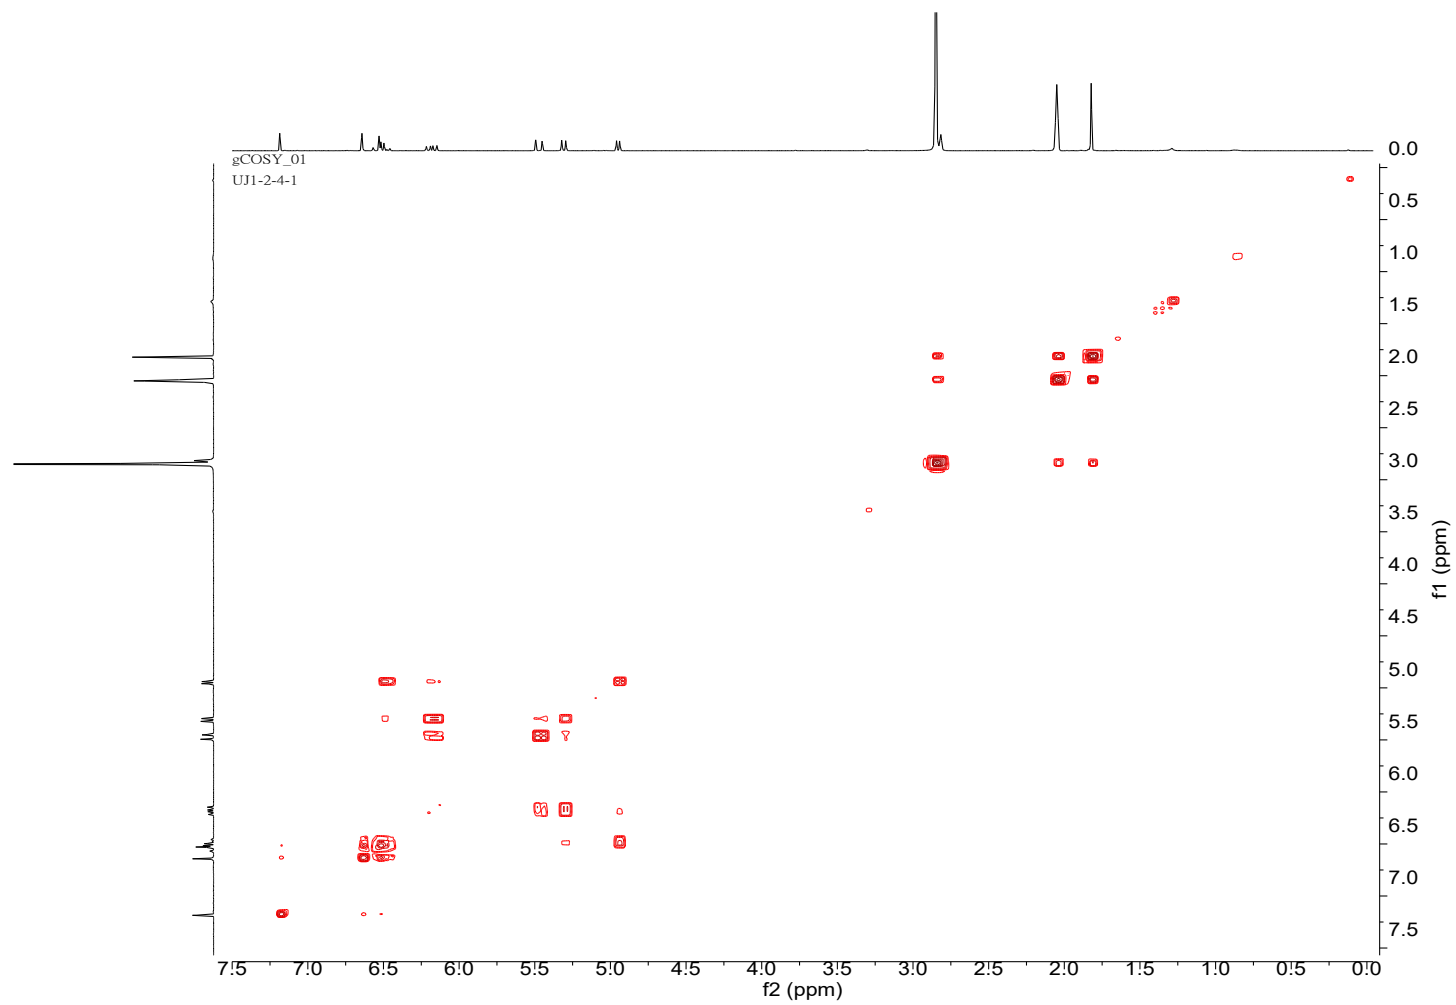

**Figure S27.** COSY spectrum of **3** in acetone- $d_6$ .

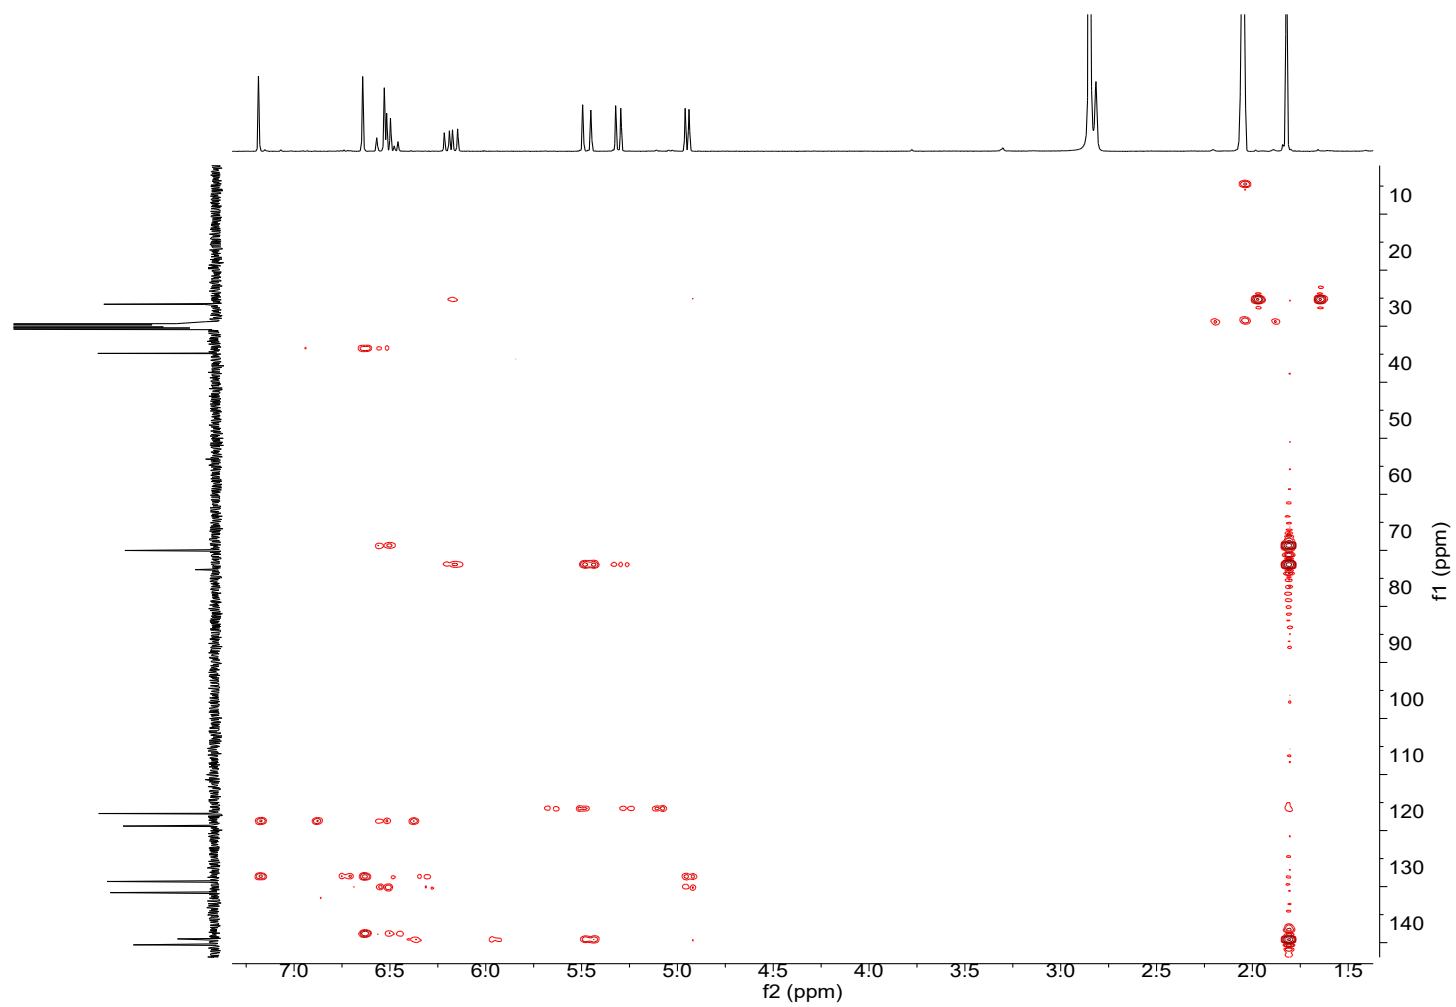

**Figure S28.** HMBC spectrum of **3** in acetone-*d*<sub>6</sub>.

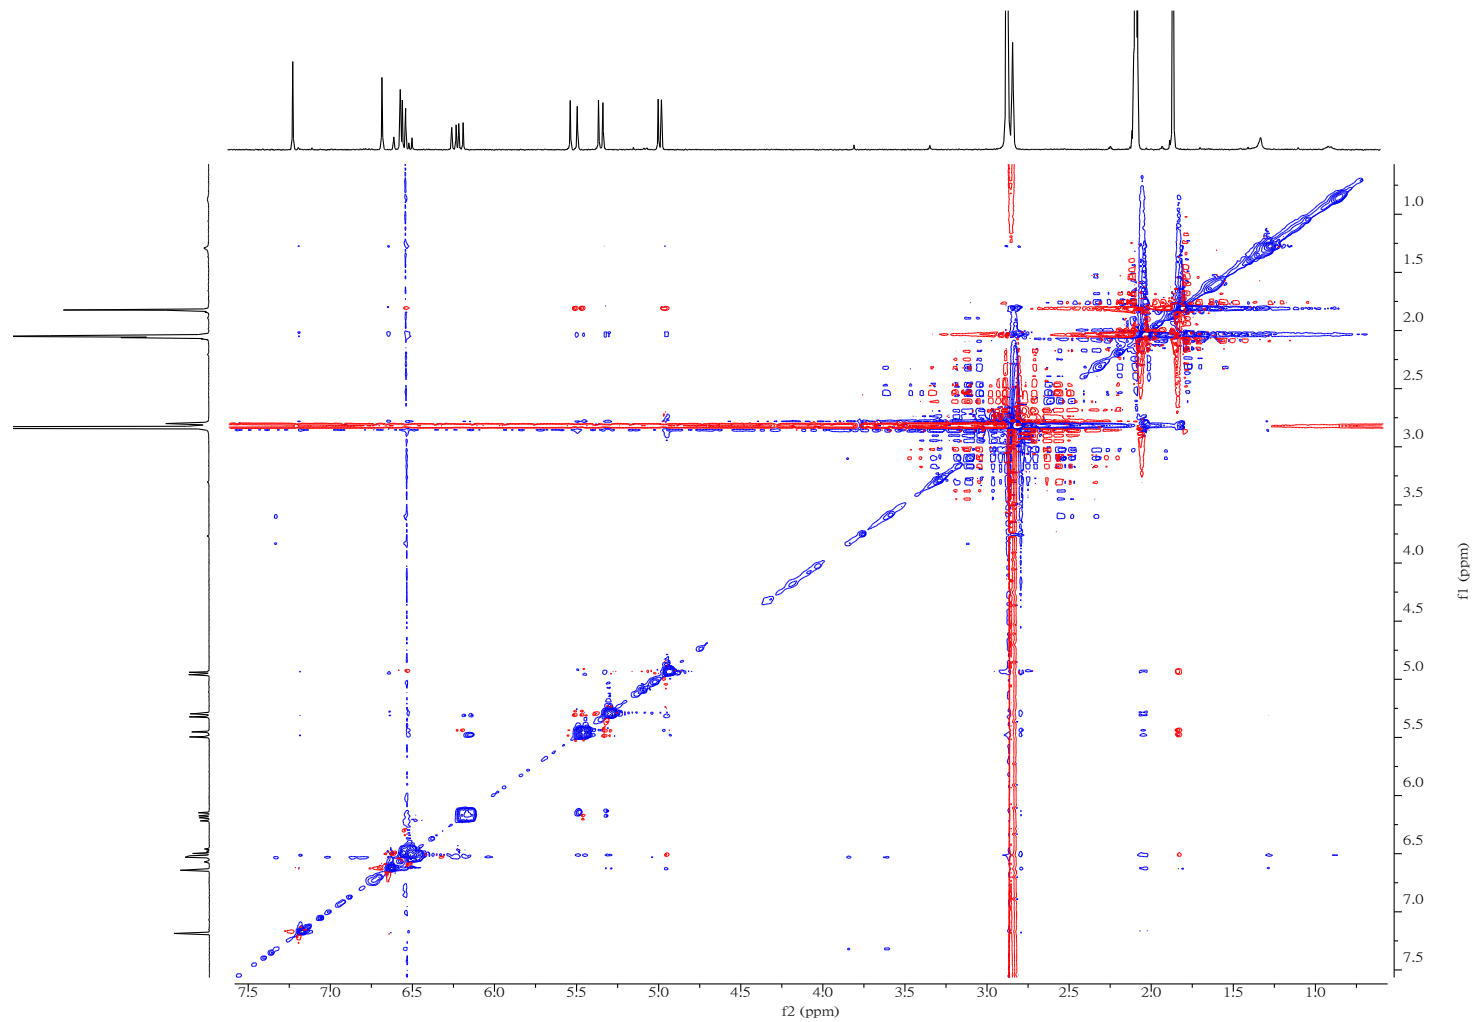

**Figure S29.** NOESY spectrum of **3** in acetone-*d*<sub>6</sub>.



(a)

| <b>Note:</b><br>Pmean > 5% is the confidence interval                                                                                |                |            |         |                |                |         |             |          |      | <table><tr><td>MAE</td><td>1.27</td></tr><tr><td>RMS</td><td>1.51</td></tr><tr><td>P<sub>mean</sub></td><td>21.71%</td></tr><tr><td>P<sub>rel</sub></td><td>43.55%</td></tr></table> |                |         |             |          |      | MAE | 1.27 | RMS | 1.51 | P <sub>mean</sub> | 21.71% | P <sub>rel</sub> | 43.55% |  |  |  |  |  |  | <table><tr><td>MAE</td><td>1.27</td></tr><tr><td>RMS</td><td>1.50</td></tr><tr><td>P<sub>mean</sub></td><td>22.28%</td></tr><tr><td>P<sub>rel</sub></td><td>56.45%</td></tr></table> |  |  |  |  |  | MAE | 1.27 | RMS | 1.50 | P <sub>mean</sub> | 22.28% | P <sub>rel</sub> | 56.45% |
|--------------------------------------------------------------------------------------------------------------------------------------|----------------|------------|---------|----------------|----------------|---------|-------------|----------|------|--------------------------------------------------------------------------------------------------------------------------------------------------------------------------------------|----------------|---------|-------------|----------|------|-----|------|-----|------|-------------------|--------|------------------|--------|--|--|--|--|--|--|--------------------------------------------------------------------------------------------------------------------------------------------------------------------------------------|--|--|--|--|--|-----|------|-----|------|-------------------|--------|------------------|--------|
| MAE                                                                                                                                  | 1.27           |            |         |                |                |         |             |          |      |                                                                                                                                                                                      |                |         |             |          |      |     |      |     |      |                   |        |                  |        |  |  |  |  |  |  |                                                                                                                                                                                      |  |  |  |  |  |     |      |     |      |                   |        |                  |        |
| RMS                                                                                                                                  | 1.51           |            |         |                |                |         |             |          |      |                                                                                                                                                                                      |                |         |             |          |      |     |      |     |      |                   |        |                  |        |  |  |  |  |  |  |                                                                                                                                                                                      |  |  |  |  |  |     |      |     |      |                   |        |                  |        |
| P <sub>mean</sub>                                                                                                                    | 21.71%         |            |         |                |                |         |             |          |      |                                                                                                                                                                                      |                |         |             |          |      |     |      |     |      |                   |        |                  |        |  |  |  |  |  |  |                                                                                                                                                                                      |  |  |  |  |  |     |      |     |      |                   |        |                  |        |
| P <sub>rel</sub>                                                                                                                     | 43.55%         |            |         |                |                |         |             |          |      |                                                                                                                                                                                      |                |         |             |          |      |     |      |     |      |                   |        |                  |        |  |  |  |  |  |  |                                                                                                                                                                                      |  |  |  |  |  |     |      |     |      |                   |        |                  |        |
| MAE                                                                                                                                  | 1.27           |            |         |                |                |         |             |          |      |                                                                                                                                                                                      |                |         |             |          |      |     |      |     |      |                   |        |                  |        |  |  |  |  |  |  |                                                                                                                                                                                      |  |  |  |  |  |     |      |     |      |                   |        |                  |        |
| RMS                                                                                                                                  | 1.50           |            |         |                |                |         |             |          |      |                                                                                                                                                                                      |                |         |             |          |      |     |      |     |      |                   |        |                  |        |  |  |  |  |  |  |                                                                                                                                                                                      |  |  |  |  |  |     |      |     |      |                   |        |                  |        |
| P <sub>mean</sub>                                                                                                                    | 22.28%         |            |         |                |                |         |             |          |      |                                                                                                                                                                                      |                |         |             |          |      |     |      |     |      |                   |        |                  |        |  |  |  |  |  |  |                                                                                                                                                                                      |  |  |  |  |  |     |      |     |      |                   |        |                  |        |
| P <sub>rel</sub>                                                                                                                     | 56.45%         |            |         |                |                |         |             |          |      |                                                                                                                                                                                      |                |         |             |          |      |     |      |     |      |                   |        |                  |        |  |  |  |  |  |  |                                                                                                                                                                                      |  |  |  |  |  |     |      |     |      |                   |        |                  |        |
| <b>Note:</b><br>sp carbons include C=N<br>sp2-CH/C for double bonds except carbonyl group<br>C=O includes only ketones and aldehydes |                |            |         |                |                |         |             |          |      |                                                                                                                                                                                      |                |         |             |          |      |     |      |     |      |                   |        |                  |        |  |  |  |  |  |  |                                                                                                                                                                                      |  |  |  |  |  |     |      |     |      |                   |        |                  |        |
|                                                                                                                                      |                |            |         | Isomer 1       |                |         |             |          |      | Isomer 2                                                                                                                                                                             |                |         |             |          |      |     |      |     |      |                   |        |                  |        |  |  |  |  |  |  |                                                                                                                                                                                      |  |  |  |  |  |     |      |     |      |                   |        |                  |        |
| Heavy atom bear                                                                                                                      | Type of carbon | Carbon no. | Exptl δ | Shielding tens | Corr Shielding | Calcd δ | Calcd δ (S) | Cabs dev | P    | Shielding tens                                                                                                                                                                       | Corr Shielding | Calcd δ | Calcd δ (S) | Cabs dev | P    | S   |      |     |      |                   |        |                  |        |  |  |  |  |  |  |                                                                                                                                                                                      |  |  |  |  |  |     |      |     |      |                   |        |                  |        |
| C-Cl                                                                                                                                 | sp3-CH2/CH/C   |            | 78.4    | 106.403762     | 115.7754745    | 80.95   | 81.33       | 2.93     | 0.01 | 106.591796                                                                                                                                                                           | 115.95         | 80.78   | 81.11       | 2.71     | 0.01 |     |      |     |      |                   |        |                  |        |  |  |  |  |  |  |                                                                                                                                                                                      |  |  |  |  |  |     |      |     |      |                   |        |                  |        |
| C-Cl                                                                                                                                 | sp3-CH2/CH/C   |            | 71.6    | 116.2302597    | 124.6409403    | 71.85   | 72.25       | 0.65     | 0.56 | 116.0448467                                                                                                                                                                          | 124.47         | 72.03   | 72.37       | 0.77     | 0.49 |     |      |     |      |                   |        |                  |        |  |  |  |  |  |  |                                                                                                                                                                                      |  |  |  |  |  |     |      |     |      |                   |        |                  |        |
|                                                                                                                                      | sp2-CH         |            | 133.8   | 66.10566204    | 66.10566204    | 132.71  | 133.01      | 0.79     | 0.61 | 65.93316549                                                                                                                                                                          | 65.93          | 132.87  | 133.11      | 0.69     | 0.65 |     |      |     |      |                   |        |                  |        |  |  |  |  |  |  |                                                                                                                                                                                      |  |  |  |  |  |     |      |     |      |                   |        |                  |        |
|                                                                                                                                      | sp2-CH         |            | 130.4   | 68.24832935    | 68.24832935    | 130.71  | 131.02      | 0.62     | 0.69 | 68.11119355                                                                                                                                                                          | 68.11          | 130.84  | 131.08      | 0.68     | 0.66 |     |      |     |      |                   |        |                  |        |  |  |  |  |  |  |                                                                                                                                                                                      |  |  |  |  |  |     |      |     |      |                   |        |                  |        |
| C-Br                                                                                                                                 | sp3-CH2/CH/C   |            | 60.4    | 123.9684263    | 137.8868988    | 58.26   | 58.67       | 1.73     | 0.12 | 123.9459762                                                                                                                                                                          | 137.86         | 58.28   | 58.65       | 1.75     | 0.11 |     |      |     |      |                   |        |                  |        |  |  |  |  |  |  |                                                                                                                                                                                      |  |  |  |  |  |     |      |     |      |                   |        |                  |        |
| C-Cl                                                                                                                                 | sp3-CH2/CH/C   |            | 71.3    | 114.9072949    | 123.4473614    | 73.08   | 73.47       | 2.17     | 0.05 | 114.8281229                                                                                                                                                                          | 123.38         | 73.15   | 73.49       | 2.19     | 0.05 |     |      |     |      |                   |        |                  |        |  |  |  |  |  |  |                                                                                                                                                                                      |  |  |  |  |  |     |      |     |      |                   |        |                  |        |
|                                                                                                                                      | sp2-CH         |            | 139.8   | 60.74881305    | 60.74881305    | 137.70  | 138.00      | 1.80     | 0.24 | 60.80547012                                                                                                                                                                          | 60.81          | 137.65  | 137.88      | 1.92     | 0.21 |     |      |     |      |                   |        |                  |        |  |  |  |  |  |  |                                                                                                                                                                                      |  |  |  |  |  |     |      |     |      |                   |        |                  |        |
|                                                                                                                                      | sp2-CH2        |            | 116.4   | 80.70268373    | 80.70268373    | 115.85  | 116.17      | 0.23     | 0.60 | 80.60929049                                                                                                                                                                          | 80.61          | 115.94  | 116.20      | 0.20     | 0.65 |     |      |     |      |                   |        |                  |        |  |  |  |  |  |  |                                                                                                                                                                                      |  |  |  |  |  |     |      |     |      |                   |        |                  |        |
|                                                                                                                                      | sp3-CH3        |            | 24.9    | 171.4031183    | 171.4031183    | 23.83   | 24.29       | 0.61     | 0.56 | 171.1996226                                                                                                                                                                          | 171.20         | 24.04   | 24.47       | 0.43     | 0.68 |     |      |     |      |                   |        |                  |        |  |  |  |  |  |  |                                                                                                                                                                                      |  |  |  |  |  |     |      |     |      |                   |        |                  |        |
|                                                                                                                                      | sp3-CH3        |            | 25.6    | 171.307225     | 171.307225     | 23.93   | 24.39       | 1.21     | 0.24 | 171.4205303                                                                                                                                                                          | 171.42         | 23.81   | 24.24       | 1.36     | 0.19 |     |      |     |      |                   |        |                  |        |  |  |  |  |  |  |                                                                                                                                                                                      |  |  |  |  |  |     |      |     |      |                   |        |                  |        |

(b)

|                                                                                                                                      |                |            |         |                |                |         |             |          |      |                |                |         |             |          |      |                |                |         |             |          |      |                |                |         |             |          |      |                |  |
|--------------------------------------------------------------------------------------------------------------------------------------|----------------|------------|---------|----------------|----------------|---------|-------------|----------|------|----------------|----------------|---------|-------------|----------|------|----------------|----------------|---------|-------------|----------|------|----------------|----------------|---------|-------------|----------|------|----------------|--|
| <b>Note:</b><br>Pmean > 5% is the confidence interval                                                                                |                |            |         |                |                |         |             |          |      |                |                |         |             |          |      |                |                |         |             |          |      |                |                |         |             |          |      |                |  |
|                                                                                                                                      |                |            |         |                |                |         |             |          |      |                |                |         |             |          |      |                |                |         |             |          |      |                |                |         |             |          |      |                |  |
|                                                                                                                                      |                |            |         |                |                |         |             |          |      |                |                |         |             |          |      |                |                |         |             |          |      |                |                |         |             |          |      |                |  |
|                                                                                                                                      |                |            |         |                |                |         |             |          |      |                |                |         |             |          |      |                |                |         |             |          |      |                |                |         |             |          |      |                |  |
| <b>Note:</b><br>sp carbons include C=N<br>sp2-CH/C for double bonds except carbonyl group<br>C=O includes only ketones and aldehydes |                |            |         |                |                |         |             |          |      |                |                |         |             |          |      |                |                |         |             |          |      |                |                |         |             |          |      |                |  |
|                                                                                                                                      |                |            |         |                |                |         |             |          |      |                |                |         |             |          |      |                |                |         |             |          |      |                |                |         |             |          |      |                |  |
|                                                                                                                                      |                |            |         |                |                |         |             |          |      |                |                |         |             |          |      |                |                |         |             |          |      |                |                |         |             |          |      |                |  |
|                                                                                                                                      |                |            |         |                |                |         |             |          |      |                |                |         |             |          |      |                |                |         |             |          |      |                |                |         |             |          |      |                |  |
|                                                                                                                                      |                |            |         |                |                |         |             |          |      | Isomer 1       |                |         |             |          |      |                |                |         |             | Isomer 2 |      |                |                |         |             |          |      |                |  |
| Heavy atom bear                                                                                                                      | Type of carbon | Carbon no. | Exptl δ | Shielding tens | Corr Shielding | Calcd δ | Calcd δ (S) | Cabs dev | P    | Shielding tens | Corr Shielding | Calcd δ | Calcd δ (S) | Cabs dev | P    | Shielding tens | Corr Shielding | Calcd δ | Calcd δ (S) | Cabs dev | P    | Shielding tens | Corr Shielding | Calcd δ | Calcd δ (S) | Cabs dev | P    | Shielding tens |  |
| None                                                                                                                                 | sp3-CH2/CH/C   |            | 78.4    | 121.1445606    | 121.1445606    | 75.44   | 76.40       | 2.00     | 0.07 | 121.306514     | 121.31         | 75.28   | 76.18       | 2.22     | 0.05 | 121.306514     | 121.31         | 75.28   | 76.18       | 2.22     | 0.05 | 121.306514     | 121.31         | 75.28   | 76.18       | 2.22     | 0.05 | 121.306514     |  |
| C-Cl                                                                                                                                 | sp3-CH2/CH/C   |            | 71.6    | 116.2302597    | 124.6409403    | 71.85   | 72.82       | 1.22     | 0.27 | 116.0448467    | 124.47         | 72.03   | 72.94       | 1.34     | 0.23 | 116.0448467    | 124.47         | 72.03   | 72.94       | 1.34     | 0.23 | 116.0448467    | 124.47         | 72.03   | 72.94       | 1.34     | 0.23 | 116.0448467    |  |
|                                                                                                                                      | sp2-CH         |            | 133.8   | 66.10566204    | 66.10566204    | 132.71  | 133.47      | 0.33     | 0.83 | 65.93316549    | 65.93          | 132.87  | 133.56      | 0.24     | 0.87 | 65.93316549    | 65.93          | 132.87  | 133.56      | 0.24     | 0.87 | 65.93316549    | 65.93          | 132.87  | 133.56      | 0.24     | 0.87 | 65.93316549    |  |
|                                                                                                                                      | sp2-CH         |            | 130.4   | 68.24832935    | 68.24832935    | 130.71  | 131.48      | 1.08     | 0.48 | 68.11119355    | 68.11          | 130.84  | 131.53      | 1.13     | 0.46 | 68.11119355    | 68.11          | 130.84  | 131.53      | 1.13     | 0.46 | 68.11119355    | 68.11          | 130.84  | 131.53      | 1.13     | 0.46 | 68.11119355    |  |
| C-Br                                                                                                                                 | sp3-CH2/CH/C   |            | 60.4    | 123.9684263    | 137.8868988    | 58.26   | 59.27       | 1.13     | 0.31 | 123.9459762    | 137.86         | 58.28   | 59.25       | 1.15     | 0.30 | 123.9459762    | 137.86         | 58.28   | 59.25       | 1.15     | 0.30 | 123.9459762    | 137.86         | 58.28   | 59.25       | 1.15     | 0.30 | 123.9459762    |  |
| C-Cl                                                                                                                                 | sp3-CH2/CH/C   |            | 71.3    | 114.9072949    | 123.4473614    | 73.08   | 74.04       | 2.74     | 0.01 | 114.8281229    | 123.38         | 73.15   | 74.07       | 2.77     | 0.01 | 114.8281229    | 123.38         | 73.15   | 74.07       | 2.77     | 0.01 | 114.8281229    | 123.38         | 73.15   | 74.07       | 2.77     | 0.01 | 114.8281229    |  |
|                                                                                                                                      | sp2-CH         |            | 139.8   | 60.74881305    | 60.74881305    | 137.70  | 138.44      | 1.36     | 0.38 | 60.80547012    | 60.81          | 137.65  | 138.32      | 1.48     | 0.34 | 60.80547012    | 60.81          | 137.65  | 138.32      | 1.48     | 0.34 | 60.80547012    | 60.81          | 137.65  | 138.32      | 1.48     | 0.34 | 60.80547012    |  |
|                                                                                                                                      | sp2-CH2        |            | 116.4   | 80.70268373    | 80.70268373    | 115.85  | 116.66      | 0.26     | 0.54 | 80.60929049    | 80.61          | 115.94  | 116.69      | 0.29     | 0.51 | 80.60929049    | 80.61          | 115.94  | 116.69      | 0.29     | 0.51 | 80.60929049    | 80.61          | 115.94  | 116.69      | 0.29     | 0.51 | 80.60929049    |  |
|                                                                                                                                      | sp3-CH3        |            | 24.9    | 171.4031183    | 171.4031183    | 23.83   | 24.96       | 0.06     | 0.95 | 171.1996226    | 171.20         | 24.04   | 25.15       | 0.25     | 0.81 | 171.1996226    | 171.20         | 24.04   | 25.15       | 0.25     | 0.81 | 171.1996226    | 171.20         | 24.04   | 25.15       | 0.25     | 0.81 | 171.1996226    |  |
|                                                                                                                                      | sp3-CH3        |            | 25.6    | 171.307225     | 171.307225     | 23.93   | 25.06       | 0.54     | 0.60 | 171.4205303    | 171.42         | 23.81   | 24.92       | 0.68     | 0.51 | 171.4205303    | 171.42         | 23.81   | 24.92       | 0.68     | 0.51 | 171.4205303    | 171.42         | 23.81   | 24.92       | 0.68     | 0.51 | 171.4205303    |  |

**Figure S30.** Experimental and GIAO NMR calculated data for 3*R*\*,4*S*\*,7*S*\*-**1** (isomer 1) and 3*R*\*,4*S*\*,7*R*\*-**1** (isomer 2) following the STS method. (a) Data were generated following the STS method without further dichloro correction. (b) Data were generated following the STS method with further correction for dichloro carbon (marked in red).

(a)

|                                                                                                                                                   |  |  |  |  |  |  |  |  |  |  |  |  |  |  |  |  |  |  |  |  |
|---------------------------------------------------------------------------------------------------------------------------------------------------|--|--|--|--|--|--|--|--|--|--|--|--|--|--|--|--|--|--|--|--|
| <b>Note:</b><br>P <sub>mean</sub> > 5% is the confidence interval                                                                                 |  |  |  |  |  |  |  |  |  |  |  |  |  |  |  |  |  |  |  |  |
|                                                                                                                                                   |  |  |  |  |  |  |  |  |  |  |  |  |  |  |  |  |  |  |  |  |
|                                                                                                                                                   |  |  |  |  |  |  |  |  |  |  |  |  |  |  |  |  |  |  |  |  |
|                                                                                                                                                   |  |  |  |  |  |  |  |  |  |  |  |  |  |  |  |  |  |  |  |  |
|                                                                                                                                                   |  |  |  |  |  |  |  |  |  |  |  |  |  |  |  |  |  |  |  |  |
| <b>Note:</b><br>sp carbons include C≡N<br>sp <sup>2</sup> -CH/C for double bonds except carbonyl group<br>C=O includes only ketones and aldehydes |  |  |  |  |  |  |  |  |  |  |  |  |  |  |  |  |  |  |  |  |
|                                                                                                                                                   |  |  |  |  |  |  |  |  |  |  |  |  |  |  |  |  |  |  |  |  |
|                                                                                                                                                   |  |  |  |  |  |  |  |  |  |  |  |  |  |  |  |  |  |  |  |  |
|                                                                                                                                                   |  |  |  |  |  |  |  |  |  |  |  |  |  |  |  |  |  |  |  |  |
|                                                                                                                                                   |  |  |  |  |  |  |  |  |  |  |  |  |  |  |  |  |  |  |  |  |
|                                                                                                                                                   |  |  |  |  |  |  |  |  |  |  |  |  |  |  |  |  |  |  |  |  |
|                                                                                                                                                   |  |  |  |  |  |  |  |  |  |  |  |  |  |  |  |  |  |  |  |  |
|                                                                                                                                                   |  |  |  |  |  |  |  |  |  |  |  |  |  |  |  |  |  |  |  |  |
|                                                                                                                                                   |  |  |  |  |  |  |  |  |  |  |  |  |  |  |  |  |  |  |  |  |
|                                                                                                                                                   |  |  |  |  |  |  |  |  |  |  |  |  |  |  |  |  |  |  |  |  |
|                                                                                                                                                   |  |  |  |  |  |  |  |  |  |  |  |  |  |  |  |  |  |  |  |  |
|                                                                                                                                                   |  |  |  |  |  |  |  |  |  |  |  |  |  |  |  |  |  |  |  |  |
|                                                                                                                                                   |  |  |  |  |  |  |  |  |  |  |  |  |  |  |  |  |  |  |  |  |
|                                                                                                                                                   |  |  |  |  |  |  |  |  |  |  |  |  |  |  |  |  |  |  |  |  |
|                                                                                                                                                   |  |  |  |  |  |  |  |  |  |  |  |  |  |  |  |  |  |  |  |  |
|                                                                                                                                                   |  |  |  |  |  |  |  |  |  |  |  |  |  |  |  |  |  |  |  |  |
|                                                                                                                                                   |  |  |  |  |  |  |  |  |  |  |  |  |  |  |  |  |  |  |  |  |
|                                                                                                                                                   |  |  |  |  |  |  |  |  |  |  |  |  |  |  |  |  |  |  |  |  |
|                                                                                                                                                   |  |  |  |  |  |  |  |  |  |  |  |  |  |  |  |  |  |  |  |  |
|                                                                                                                                                   |  |  |  |  |  |  |  |  |  |  |  |  |  |  |  |  |  |  |  |  |
|                                                                                                                                                   |  |  |  |  |  |  |  |  |  |  |  |  |  |  |  |  |  |  |  |  |
|                                                                                                                                                   |  |  |  |  |  |  |  |  |  |  |  |  |  |  |  |  |  |  |  |  |
|                                                                                                                                                   |  |  |  |  |  |  |  |  |  |  |  |  |  |  |  |  |  |  |  |  |
|                                                                                                                                                   |  |  |  |  |  |  |  |  |  |  |  |  |  |  |  |  |  |  |  |  |
|                                                                                                                                                   |  |  |  |  |  |  |  |  |  |  |  |  |  |  |  |  |  |  |  |  |
|                                                                                                                                                   |  |  |  |  |  |  |  |  |  |  |  |  |  |  |  |  |  |  |  |  |
|                                                                                                                                                   |  |  |  |  |  |  |  |  |  |  |  |  |  |  |  |  |  |  |  |  |
|                                                                                                                                                   |  |  |  |  |  |  |  |  |  |  |  |  |  |  |  |  |  |  |  |  |
|                                                                                                                                                   |  |  |  |  |  |  |  |  |  |  |  |  |  |  |  |  |  |  |  |  |
|                                                                                                                                                   |  |  |  |  |  |  |  |  |  |  |  |  |  |  |  |  |  |  |  |  |
|                                                                                                                                                   |  |  |  |  |  |  |  |  |  |  |  |  |  |  |  |  |  |  |  |  |
|                                                                                                                                                   |  |  |  |  |  |  |  |  |  |  |  |  |  |  |  |  |  |  |  |  |
|                                                                                                                                                   |  |  |  |  |  |  |  |  |  |  |  |  |  |  |  |  |  |  |  |  |
|                                                                                                                                                   |  |  |  |  |  |  |  |  |  |  |  |  |  |  |  |  |  |  |  |  |
|                                                                                                                                                   |  |  |  |  |  |  |  |  |  |  |  |  |  |  |  |  |  |  |  |  |
|                                                                                                                                                   |  |  |  |  |  |  |  |  |  |  |  |  |  |  |  |  |  |  |  |  |
|                                                                                                                                                   |  |  |  |  |  |  |  |  |  |  |  |  |  |  |  |  |  |  |  |  |
|                                                                                                                                                   |  |  |  |  |  |  |  |  |  |  |  |  |  |  |  |  |  |  |  |  |
|                                                                                                                                                   |  |  |  |  |  |  |  |  |  |  |  |  |  |  |  |  |  |  |  |  |
|                                                                                                                                                   |  |  |  |  |  |  |  |  |  |  |  |  |  |  |  |  |  |  |  |  |
|                                                                                                                                                   |  |  |  |  |  |  |  |  |  |  |  |  |  |  |  |  |  |  |  |  |
|                                                                                                                                                   |  |  |  |  |  |  |  |  |  |  |  |  |  |  |  |  |  |  |  |  |
|                                                                                                                                                   |  |  |  |  |  |  |  |  |  |  |  |  |  |  |  |  |  |  |  |  |
|                                                                                                                                                   |  |  |  |  |  |  |  |  |  |  |  |  |  |  |  |  |  |  |  |  |
|                                                                                                                                                   |  |  |  |  |  |  |  |  |  |  |  |  |  |  |  |  |  |  |  |  |
|                                                                                                                                                   |  |  |  |  |  |  |  |  |  |  |  |  |  |  |  |  |  |  |  |  |
|                                                                                                                                                   |  |  |  |  |  |  |  |  |  |  |  |  |  |  |  |  |  |  |  |  |
|                                                                                                                                                   |  |  |  |  |  |  |  |  |  |  |  |  |  |  |  |  |  |  |  |  |
|                                                                                                                                                   |  |  |  |  |  |  |  |  |  |  |  |  |  |  |  |  |  |  |  |  |
|                                                                                                                                                   |  |  |  |  |  |  |  |  |  |  |  |  |  |  |  |  |  |  |  |  |
|                                                                                                                                                   |  |  |  |  |  |  |  |  |  |  |  |  |  |  |  |  |  |  |  |  |
|                                                                                                                                                   |  |  |  |  |  |  |  |  |  |  |  |  |  |  |  |  |  |  |  |  |
|                                                                                                                                                   |  |  |  |  |  |  |  |  |  |  |  |  |  |  |  |  |  |  |  |  |
|                                                                                                                                                   |  |  |  |  |  |  |  |  |  |  |  |  |  |  |  |  |  |  |  |  |
|                                                                                                                                                   |  |  |  |  |  |  |  |  |  |  |  |  |  |  |  |  |  |  |  |  |
|                                                                                                                                                   |  |  |  |  |  |  |  |  |  |  |  |  |  |  |  |  |  |  |  |  |
|                                                                                                                                                   |  |  |  |  |  |  |  |  |  |  |  |  |  |  |  |  |  |  |  |  |
|                                                                                                                                                   |  |  |  |  |  |  |  |  |  |  |  |  |  |  |  |  |  |  |  |  |
|                                                                                                                                                   |  |  |  |  |  |  |  |  |  |  |  |  |  |  |  |  |  |  |  |  |
|                                                                                                                                                   |  |  |  |  |  |  |  |  |  |  |  |  |  |  |  |  |  |  |  |  |
|                                                                                                                                                   |  |  |  |  |  |  |  |  |  |  |  |  |  |  |  |  |  |  |  |  |
|                                                                                                                                                   |  |  |  |  |  |  |  |  |  |  |  |  |  |  |  |  |  |  |  |  |
|                                                                                                                                                   |  |  |  |  |  |  |  |  |  |  |  |  |  |  |  |  |  |  |  |  |
|                                                                                                                                                   |  |  |  |  |  |  |  |  |  |  |  |  |  |  |  |  |  |  |  |  |
|                                                                                                                                                   |  |  |  |  |  |  |  |  |  |  |  |  |  |  |  |  |  |  |  |  |
|                                                                                                                                                   |  |  |  |  |  |  |  |  |  |  |  |  |  |  |  |  |  |  |  |  |
|                                                                                                                                                   |  |  |  |  |  |  |  |  |  |  |  |  |  |  |  |  |  |  |  |  |
|                                                                                                                                                   |  |  |  |  |  |  |  |  |  |  |  |  |  |  |  |  |  |  |  |  |
|                                                                                                                                                   |  |  |  |  |  |  |  |  |  |  |  |  |  |  |  |  |  |  |  |  |
|                                                                                                                                                   |  |  |  |  |  |  |  |  |  |  |  |  |  |  |  |  |  |  |  |  |
|                                                                                                                                                   |  |  |  |  |  |  |  |  |  |  |  |  |  |  |  |  |  |  |  |  |
|                                                                                                                                                   |  |  |  |  |  |  |  |  |  |  |  |  |  |  |  |  |  |  |  |  |
|                                                                                                                                                   |  |  |  |  |  |  |  |  |  |  |  |  |  |  |  |  |  |  |  |  |
|                                                                                                                                                   |  |  |  |  |  |  |  |  |  |  |  |  |  |  |  |  |  |  |  |  |
|                                                                                                                                                   |  |  |  |  |  |  |  |  |  |  |  |  |  |  |  |  |  |  |  |  |
|                                                                                                                                                   |  |  |  |  |  |  |  |  |  |  |  |  |  |  |  |  |  |  |  |  |
|                                                                                                                                                   |  |  |  |  |  |  |  |  |  |  |  |  |  |  |  |  |  |  |  |  |
|                                                                                                                                                   |  |  |  |  |  |  |  |  |  |  |  |  |  |  |  |  |  |  |  |  |
|                                                                                                                                                   |  |  |  |  |  |  |  |  |  |  |  |  |  |  |  |  |  |  |  |  |
|                                                                                                                                                   |  |  |  |  |  |  |  |  |  |  |  |  |  |  |  |  |  |  |  |  |
|                                                                                                                                                   |  |  |  |  |  |  |  |  |  |  |  |  |  |  |  |  |  |  |  |  |
|                                                                                                                                                   |  |  |  |  |  |  |  |  |  |  |  |  |  |  |  |  |  |  |  |  |
|                                                                                                                                                   |  |  |  |  |  |  |  |  |  |  |  |  |  |  |  |  |  |  |  |  |
|                                                                                                                                                   |  |  |  |  |  |  |  |  |  |  |  |  |  |  |  |  |  |  |  |  |
|                                                                                                                                                   |  |  |  |  |  |  |  |  |  |  |  |  |  |  |  |  |  |  |  |  |
|                                                                                                                                                   |  |  |  |  |  |  |  |  |  |  |  |  |  |  |  |  |  |  |  |  |
|                                                                                                                                                   |  |  |  |  |  |  |  |  |  |  |  |  |  |  |  |  |  |  |  |  |
|                                                                                                                                                   |  |  |  |  |  |  |  |  |  |  |  |  |  |  |  |  |  |  |  |  |
|                                                                                                                                                   |  |  |  |  |  |  |  |  |  |  |  |  |  |  |  |  |  |  |  |  |
|                                                                                                                                                   |  |  |  |  |  |  |  |  |  |  |  |  |  |  |  |  |  |  |  |  |
|                                                                                                                                                   |  |  |  |  |  |  |  |  |  |  |  |  |  |  |  |  |  |  |  |  |
|                                                                                                                                                   |  |  |  |  |  |  |  |  |  |  |  |  |  |  |  |  |  |  |  |  |
|                                                                                                                                                   |  |  |  |  |  |  |  |  |  |  |  |  |  |  |  |  |  |  |  |  |
|                                                                                                                                                   |  |  |  |  |  |  |  |  |  |  |  |  |  |  |  |  |  |  |  |  |
|                                                                                                                                                   |  |  |  |  |  |  |  |  |  |  |  |  |  |  |  |  |  |  |  |  |
|                                                                                                                                                   |  |  |  |  |  |  |  |  |  |  |  |  |  |  |  |  |  |  |  |  |
|                                                                                                                                                   |  |  |  |  |  |  |  |  |  |  |  |  |  |  |  |  |  |  |  |  |
|                                                                                                                                                   |  |  |  |  |  |  |  |  |  |  |  |  |  |  |  |  |  |  |  |  |
|                                                                                                                                                   |  |  |  |  |  |  |  |  |  |  |  |  |  |  |  |  |  |  |  |  |
|                                                                                                                                                   |  |  |  |  |  |  |  |  |  |  |  |  |  |  |  |  |  |  |  |  |
|                                                                                                                                                   |  |  |  |  |  |  |  |  |  |  |  |  |  |  |  |  |  |  |  |  |
|                                                                                                                                                   |  |  |  |  |  |  |  |  |  |  |  |  |  |  |  |  |  |  |  |  |
|                                                                                                                                                   |  |  |  |  |  |  |  |  |  |  |  |  |  |  |  |  |  |  |  |  |
|                                                                                                                                                   |  |  |  |  |  |  |  |  |  |  |  |  |  |  |  |  |  |  |  |  |
|                                                                                                                                                   |  |  |  |  |  |  |  |  |  |  |  |  |  |  |  |  |  |  |  |  |
|                                                                                                                                                   |  |  |  |  |  |  |  |  |  |  |  |  |  |  |  |  |  |  |  |  |
|                                                                                                                                                   |  |  |  |  |  |  |  |  |  |  |  |  |  |  |  |  |  |  |  |  |
|                                                                                                                                                   |  |  |  |  |  |  |  |  |  |  |  |  |  |  |  |  |  |  |  |  |
|                                                                                                                                                   |  |  |  |  |  |  |  |  |  |  |  |  |  |  |  |  |  |  |  |  |
|                                                                                                                                                   |  |  |  |  |  |  |  |  |  |  |  |  |  |  |  |  |  |  |  |  |
|                                                                                                                                                   |  |  |  |  |  |  |  |  |  |  |  |  |  |  |  |  |  |  |  |  |
|                                                                                                                                                   |  |  |  |  |  |  |  |  |  |  |  |  |  |  |  |  |  |  |  |  |
|                                                                                                                                                   |  |  |  |  |  |  |  |  |  |  |  |  |  |  |  |  |  |  |  |  |
|                                                                                                                                                   |  |  |  |  |  |  |  |  |  |  |  |  |  |  |  |  |  |  |  |  |
|                                                                                                                                                   |  |  |  |  |  |  |  |  |  |  |  |  |  |  |  |  |  |  |  |  |
|                                                                                                                                                   |  |  |  |  |  |  |  |  |  |  |  |  |  |  |  |  |  |  |  |  |
|                                                                                                                                                   |  |  |  |  |  |  |  |  |  |  |  |  |  |  |  |  |  |  |  |  |
|                                                                                                                                                   |  |  |  |  |  |  |  |  |  |  |  |  |  |  |  |  |  |  |  |  |
|                                                                                                                                                   |  |  |  |  |  |  |  |  |  |  |  |  |  |  |  |  |  |  |  |  |
|                                                                                                                                                   |  |  |  |  |  |  |  |  |  |  |  |  |  |  |  |  |  |  |  |  |
|                                                                                                                                                   |  |  |  |  |  |  |  |  |  |  |  |  |  |  |  |  |  |  |  |  |
|                                                                                                                                                   |  |  |  |  |  |  |  |  |  |  |  |  |  |  |  |  |  |  |  |  |
|                                                                                                                                                   |  |  |  |  |  |  |  |  |  |  |  |  |  |  |  |  |  |  |  |  |
|                                                                                                                                                   |  |  |  |  |  |  |  |  |  |  |  |  |  |  |  |  |  |  |  |  |
|                                                                                                                                                   |  |  |  |  |  |  |  |  |  |  |  |  |  |  |  |  |  |  |  |  |
|                                                                                                                                                   |  |  |  |  |  |  |  |  |  |  |  |  |  |  |  |  |  |  |  |  |
|                                                                                                                                                   |  |  |  |  |  |  |  |  |  |  |  |  |  |  |  |  |  |  |  |  |
|                                                                                                                                                   |  |  |  |  |  |  |  |  |  |  |  |  |  |  |  |  |  |  |  |  |
|                                                                                                                                                   |  |  |  |  |  |  |  |  |  |  |  |  |  |  |  |  |  |  |  |  |
|                                                                                                                                                   |  |  |  |  |  |  |  |  |  |  |  |  |  |  |  |  |  |  |  |  |
|                                                                                                                                                   |  |  |  |  |  |  |  |  |  |  |  |  |  |  |  |  |  |  |  |  |
|                                                                                                                                                   |  |  |  |  |  |  |  |  |  |  |  |  |  |  |  |  |  |  |  |  |
|                                                                                                                                                   |  |  |  |  |  |  |  |  |  |  |  |  |  |  |  |  |  |  |  |  |
|                                                                                                                                                   |  |  |  |  |  |  |  |  |  |  |  |  |  |  |  |  |  |  |  |  |
|                                                                                                                                                   |  |  |  |  |  |  |  |  |  |  |  |  |  |  |  |  |  |  |  |  |
|                                                                                                                                                   |  |  |  |  |  |  |  |  |  |  |  |  |  |  |  |  |  |  |  |  |
|                                                                                                                                                   |  |  |  |  |  |  |  |  |  |  |  |  |  |  |  |  |  |  |  |  |
|                                                                                                                                                   |  |  |  |  |  |  |  |  |  |  |  |  |  |  |  |  |  |  |  |  |
|                                                                                                                                                   |  |  |  |  |  |  |  |  |  |  |  |  |  |  |  |  |  |  |  |  |
|                                                                                                                                                   |  |  |  |  |  |  |  |  |  |  |  |  |  |  |  |  |  |  |  |  |
|                                                                                                                                                   |  |  |  |  |  |  |  |  |  |  |  |  |  |  |  |  |  |  |  |  |
|                                                                                                                                                   |  |  |  |  |  |  |  |  |  |  |  |  |  |  |  |  |  |  |  |  |
|                                                                                                                                                   |  |  |  |  |  |  |  |  |  |  |  |  |  |  |  |  |  |  |  |  |
|                                                                                                                                                   |  |  |  |  |  |  |  |  |  |  |  |  |  |  |  |  |  |  |  |  |
|                                                                                                                                                   |  |  |  |  |  |  |  |  |  |  |  |  |  |  |  |  |  |  |  |  |
|                                                                                                                                                   |  |  |  |  |  |  |  |  |  |  |  |  |  |  |  |  |  |  |  |  |
|                                                                                                                                                   |  |  |  |  |  |  |  |  |  |  |  |  |  |  |  |  |  |  |  |  |
|                                                                                                                                                   |  |  |  |  |  |  |  |  |  |  |  |  |  |  |  |  |  |  |  |  |
|                                                                                                                                                   |  |  |  |  |  |  |  |  |  |  |  |  |  |  |  |  |  |  |  |  |
|                                                                                                                                                   |  |  |  |  |  |  |  |  |  |  |  |  |  |  |  |  |  |  |  |  |
|                                                                                                                                                   |  |  |  |  |  |  |  |  |  |  |  |  |  |  |  |  |  |  |  |  |
|                                                                                                                                                   |  |  |  |  |  |  |  |  |  |  |  |  |  |  |  |  |  |  |  |  |
|                                                                                                                                                   |  |  |  |  |  |  |  |  |  |  |  |  |  |  |  |  |  |  |  |  |
|                                                                                                                                                   |  |  |  |  |  |  |  |  |  |  |  |  |  |  |  |  |  |  |  |  |
|                                                                                                                                                   |  |  |  |  |  |  |  |  |  |  |  |  |  |  |  |  |  |  |  |  |
|                                                                                                                                                   |  |  |  |  |  |  |  |  |  |  |  |  |  |  |  |  |  |  |  |  |
|                                                                                                                                                   |  |  |  |  |  |  |  |  |  |  |  |  |  |  |  |  |  |  |  |  |
|                                                                                                                                                   |  |  |  |  |  |  |  |  |  |  |  |  |  |  |  |  |  |  |  |  |
|                                                                                                                                                   |  |  |  |  |  |  |  |  |  |  |  |  |  |  |  |  |  |  |  |  |
|                                                                                                                                                   |  |  |  |  |  |  |  |  |  |  |  |  |  |  |  |  |  |  |  |  |
|                                                                                                                                                   |  |  |  |  |  |  |  |  |  |  |  |  |  |  |  |  |  |  |  |  |
|                                                                                                                                                   |  |  |  |  |  |  |  |  |  |  |  |  |  |  |  |  |  |  |  |  |
|                                                                                                                                                   |  |  |  |  |  |  |  |  |  |  |  |  |  |  |  |  |  |  |  |  |
|                                                                                                                                                   |  |  |  |  |  |  |  |  |  |  |  |  |  |  |  |  |  |  |  |  |
|                                                                                                                                                   |  |  |  |  |  |  |  |  |  |  |  |  |  |  |  |  |  |  |  |  |
|                                                                                                                                                   |  |  |  |  |  |  |  |  |  |  |  |  |  |  |  |  |  |  |  |  |
|                                                                                                                                                   |  |  |  |  |  |  |  |  |  |  |  |  |  |  |  |  |  |  |  |  |
|                                                                                                                                                   |  |  |  |  |  |  |  |  |  |  |  |  |  |  |  |  |  |  |  |  |
|                                                                                                                                                   |  |  |  |  |  |  |  |  |  |  |  |  |  |  |  |  |  |  |  |  |
|                                                                                                                                                   |  |  |  |  |  |  |  |  |  |  |  |  |  |  |  |  |  |  |  |  |
|                                                                                                                                                   |  |  |  |  |  |  |  |  |  |  |  |  |  |  |  |  |  |  |  |  |
|                                                                                                                                                   |  |  |  |  |  |  |  |  |  |  |  |  |  |  |  |  |  |  |  |  |
|                                                                                                                                                   |  |  |  |  |  |  |  |  |  |  |  |  |  |  |  |  |  |  |  |  |
|                                                                                                                                                   |  |  |  |  |  |  |  |  |  |  |  |  |  |  |  |  |  |  |  |  |
|                                                                                                                                                   |  |  |  |  |  |  |  |  |  |  |  |  |  |  |  |  |  |  |  |  |
|                                                                                                                                                   |  |  |  |  |  |  |  |  |  |  |  |  |  |  |  |  |  |  |  |  |
|                                                                                                                                                   |  |  |  |  |  |  |  |  |  |  |  |  |  |  |  |  |  |  |  |  |
|                                                                                                                                                   |  |  |  |  |  |  |  |  |  |  |  |  |  |  |  |  |  |  |  |  |
|                                                                                                                                                   |  |  |  |  |  |  |  |  |  |  |  |  |  |  |  |  |  |  |  |  |
|                                                                                                                                                   |  |  |  |  |  |  |  |  |  |  |  |  |  |  |  |  |  |  |  |  |
|                                                                                                                                                   |  |  |  |  |  |  |  |  |  |  |  |  |  |  |  |  |  |  |  |  |
|                                                                                                                                                   |  |  |  |  |  |  |  |  |  |  |  |  |  |  |  |  |  |  |  |  |
|                                                                                                                                                   |  |  |  |  |  |  |  |  |  |  |  |  |  |  |  |  |  |  |  |  |
|                                                                                                                                                   |  |  |  |  |  |  |  |  |  |  |  |  |  |  |  |  |  |  |  |  |
|                                                                                                                                                   |  |  |  |  |  |  |  |  |  |  |  |  |  |  |  |  |  |  |  |  |
|                                                                                                                                                   |  |  |  |  |  |  |  |  |  |  |  |  |  |  |  |  |  |  |  |  |
|                                                                                                                                                   |  |  |  |  |  |  |  |  |  |  |  |  |  |  |  |  |  |  |  |  |
|                                                                                                                                                   |  |  |  |  |  |  |  |  |  |  |  |  |  |  |  |  |  |  |  |  |
|                                                                                                                                                   |  |  |  |  |  |  |  |  |  |  |  |  |  |  |  |  |  |  |  |  |
|                                                                                                                                                   |  |  |  |  |  |  |  |  |  |  |  |  |  |  |  |  |  |  |  |  |
|                                                                                                                                                   |  |  |  |  |  |  |  |  |  |  |  |  |  |  |  |  |  |  |  |  |
|                                                                                                                                                   |  |  |  |  |  |  |  |  |  |  |  |  |  |  |  |  |  |  |  |  |
|                                                                                                                                                   |  |  |  |  |  |  |  |  |  |  |  |  |  |  |  |  |  |  |  |  |
|                                                                                                                                                   |  |  |  |  |  |  |  |  |  |  |  |  |  |  |  |  |  |  |  |  |
|                                                                                                                                                   |  |  |  |  |  |  |  |  |  |  |  |  |  |  |  |  |  |  |  |  |
|                                                                                                                                                   |  |  |  |  |  |  |  |  |  |  |  |  |  |  |  |  |  |  |  |  |
|                                                                                                                                                   |  |  |  |  |  |  |  |  |  |  |  |  |  |  |  |  |  |  |  |  |
|                                                                                                                                                   |  |  |  |  |  |  |  |  |  |  |  |  |  |  |  |  |  |  |  |  |
|                                                                                                                                                   |  |  |  |  |  |  |  |  |  |  |  |  |  |  |  |  |  |  |  |  |
|                                                                                                                                                   |  |  |  |  |  |  |  |  |  |  |  |  |  |  |  |  |  |  |  |  |
|                                                                                                                                                   |  |  |  |  |  |  |  |  |  |  |  |  |  |  |  |  |  |  |  |  |
|                                                                                                                                                   |  |  |  |  |  |  |  |  |  |  |  |  |  |  |  |  |  |  |  |  |
|                                                                                                                                                   |  |  |  |  |  |  |  |  |  |  |  |  |  |  |  |  |  |  |  |  |
|                                                                                                                                                   |  |  |  |  |  |  |  |  |  |  |  |  |  |  |  |  |  |  |  |  |
|                                                                                                                                                   |  |  |  |  |  |  |  |  |  |  |  |  |  |  |  |  |  |  |  |  |
|                                                                                                                                                   |  |  |  |  |  |  |  |  |  |  |  |  |  |  |  |  |  |  |  |  |
|                                                                                                                                                   |  |  |  |  |  |  |  |  |  |  |  |  |  |  |  |  |  |  |  |  |
|                                                                                                                                                   |  |  |  |  |  |  |  |  |  |  |  |  |  |  |  |  |  |  |  |  |
|                                                                                                                                                   |  |  |  |  |  |  |  |  |  |  |  |  |  |  |  |  |  |  |  |  |
|                                                                                                                                                   |  |  |  |  |  |  |  |  |  |  |  |  |  |  |  |  |  |  |  |  |
|                                                                                                                                                   |  |  |  |  |  |  |  |  |  |  |  |  |  |  |  |  |  |  |  |  |
|                                                                                                                                                   |  |  |  |  |  |  |  |  |  |  |  |  |  |  |  |  |  |  |  |  |
|                                                                                                                                                   |  |  |  |  |  |  |  |  |  |  |  |  |  |  |  |  |  |  |  |  |
|                                                                                                                                                   |  |  |  |  |  |  |  |  |  |  |  |  |  |  |  |  |  |  |  |  |
|                                                                                                                                                   |  |  |  |  |  |  |  |  |  |  |  |  |  |  |  |  |  |  |  |  |
|                                                                                                                                                   |  |  |  |  |  |  |  |  |  |  |  |  |  |  |  |  |  |  |  |  |
|                                                                                                                                                   |  |  |  |  |  |  |  |  |  |  |  |  |  |  |  |  |  |  |  |  |
|                                                                                                                                                   |  |  |  |  |  |  |  |  |  |  |  |  |  |  |  |  |  |  |  |  |
|                                                                                                                                                   |  |  |  |  |  |  |  |  |  |  |  |  |  |  |  |  |  |  |  |  |
|                                                                                                                                                   |  |  |  |  |  |  |  |  |  |  |  |  |  |  |  |  |  |  |  |  |
|                                                                                                                                                   |  |  |  |  |  |  |  |  |  |  |  |  |  |  |  |  |  |  |  |  |
|                                                                                                                                                   |  |  |  |  |  |  |  |  |  |  |  |  |  |  |  |  |  |  |  |  |
|                                                                                                                                                   |  |  |  |  |  |  |  |  |  |  |  |  |  |  |  |  |  |  |  |  |
|                                                                                                                                                   |  |  |  |  |  |  |  |  |  |  |  |  |  |  |  |  |  |  |  |  |
|                                                                                                                                                   |  |  |  |  |  |  |  |  |  |  |  |  |  |  |  |  |  |  |  |  |
|                                                                                                                                                   |  |  |  |  |  |  |  |  |  |  |  |  |  |  |  |  |  |  |  |  |
|                                                                                                                                                   |  |  |  |  |  |  |  |  |  |  |  |  |  |  |  |  |  |  |  |  |
|                                                                                                                                                   |  |  |  |  |  |  |  |  |  |  |  |  |  |  |  |  |  |  |  |  |
|                                                                                                                                                   |  |  |  |  |  |  |  |  |  |  |  |  |  |  |  |  |  |  |  |  |
|                                                                                                                                                   |  |  |  |  |  |  |  |  |  |  |  |  |  |  |  |  |  |  |  |  |
|                                                                                                                                                   |  |  |  |  |  |  |  |  |  |  |  |  |  |  |  |  |  |  |  |  |
|                                                                                                                                                   |  |  |  |  |  |  |  |  |  |  |  |  |  |  |  |  |  |  |  |  |
|                                                                                                                                                   |  |  |  |  |  |  |  |  |  |  |  |  |  |  |  |  |  |  |  |  |
|                                                                                                                                                   |  |  |  |  |  |  |  |  |  |  |  |  |  |  |  |  |  |  |  |  |
|                                                                                                                                                   |  |  |  |  |  |  |  |  |  |  |  |  |  |  |  |  |  |  |  |  |
|                                                                                                                                                   |  |  |  |  |  |  |  |  |  |  |  |  |  |  |  |  |  |  |  |  |
|                                                                                                                                                   |  |  |  |  |  |  |  |  |  |  |  |  |  |  |  |  |  |  |  |  |
|                                                                                                                                                   |  |  |  |  |  |  |  |  |  |  |  |  |  |  |  |  |  |  |  |  |
|                                                                                                                                                   |  |  |  |  |  |  |  |  |  |  |  |  |  |  |  |  |  |  |  |  |
|                                                                                                                                                   |  |  |  |  |  |  |  |  |  |  |  |  |  |  |  |  |  |  |  |  |
|                                                                                                                                                   |  |  |  |  |  |  |  |  |  |  |  |  |  |  |  |  |  |  |  |  |
|                                                                                                                                                   |  |  |  |  |  |  |  |  |  |  |  |  |  |  |  |  |  |  |  |  |
|                                                                                                                                                   |  |  |  |  |  |  |  |  |  |  |  |  |  |  |  |  |  |  |  |  |
|                                                                                                                                                   |  |  |  |  |  |  |  |  |  |  |  |  |  |  |  |  |  |  |  |  |
|                                                                                                                                                   |  |  |  |  |  |  |  |  |  |  |  |  |  |  |  |  |  |  |  |  |
|                                                                                                                                                   |  |  |  |  |  |  |  |  |  |  |  |  |  |  |  |  |  |  |  |  |
|                                                                                                                                                   |  |  |  |  |  |  |  |  |  |  |  |  |  |  |  |  |  |  |  |  |
|                                                                                                                                                   |  |  |  |  |  |  |  |  |  |  |  |  |  |  |  |  |  |  |  |  |
|                                                                                                                                                   |  |  |  |  |  |  |  |  |  |  |  |  |  |  |  |  |  |  |  |  |
|                                                                                                                                                   |  |  |  |  |  |  |  |  |  |  |  |  |  |  |  |  |  |  |  |  |
|                                                                                                                                                   |  |  |  |  |  |  |  |  |  |  |  |  |  |  |  |  |  |  |  |  |
|                                                                                                                                                   |  |  |  |  |  |  |  |  |  |  |  |  |  |  |  |  |  |  |  |  |
|                                                                                                                                                   |  |  |  |  |  |  |  |  |  |  |  |  |  |  |  |  |  |  |  |  |
|                                                                                                                                                   |  |  |  |  |  |  |  |  |  |  |  |  |  |  |  |  |  |  |  |  |
|                                                                                                                                                   |  |  |  |  |  |  |  |  |  |  |  |  |  |  |  |  |  |  |  |  |
|                                                                                                                                                   |  |  |  |  |  |  |  |  |  |  |  |  |  |  |  |  |  |  |  |  |
|                                                                                                                                                   |  |  |  |  |  |  |  |  |  |  |  |  |  |  |  |  |  |  |  |  |
|                                                                                                                                                   |  |  |  |  |  |  |  |  |  |  |  |  |  |  |  |  |  |  |  |  |
|                                                                                                                                                   |  |  |  |  |  |  |  |  |  |  |  |  |  |  |  |  |  |  |  |  |
|                                                                                                                                                   |  |  |  |  |  |  |  |  |  |  |  |  |  |  |  |  |  |  |  |  |
|                                                                                                                                                   |  |  |  |  |  |  |  |  |  |  |  |  |  |  |  |  |  |  |  |  |
|                                                                                                                                                   |  |  |  |  |  |  |  |  |  |  |  |  |  |  |  |  |  |  |  |  |
|                                                                                                                                                   |  |  |  |  |  |  |  |  |  |  |  |  |  |  |  |  |  |  |  |  |
|                                                                                                                                                   |  |  |  |  |  |  |  |  |  |  |  |  |  |  |  |  |  |  |  |  |
|                                                                                                                                                   |  |  |  |  |  |  |  |  |  |  |  |  |  |  |  |  |  |  |  |  |
|                                                                                                                                                   |  |  |  |  |  |  |  |  |  |  |  |  |  |  |  |  |  |  |  |  |
|                                                                                                                                                   |  |  |  |  |  |  |  |  |  |  |  |  |  |  |  |  |  |  |  |  |
|                                                                                                                                                   |  |  |  |  |  |  |  |  |  |  |  |  |  |  |  |  |  |  |  |  |
|                                                                                                                                                   |  |  |  |  |  |  |  |  |  |  |  |  |  |  |  |  |  |  |  |  |
|                                                                                                                                                   |  |  |  |  |  |  |  |  |  |  |  |  |  |  |  |  |  |  |  |  |
|                                                                                                                                                   |  |  |  |  |  |  |  |  |  |  |  |  |  |  |  |  |  |  |  |  |
|                                                                                                                                                   |  |  |  |  |  |  |  |  |  |  |  |  |  |  |  |  |  |  |  |  |
|                                                                                                                                                   |  |  |  |  |  |  |  |  |  |  |  |  |  |  |  |  |  |  |  |  |
|                                                                                                                                                   |  |  |  |  |  |  |  |  |  |  |  |  |  |  |  |  |  |  |  |  |
|                                                                                                                                                   |  |  |  |  |  |  |  |  |  |  |  |  |  |  |  |  |  |  |  |  |
|                                                                                                                                                   |  |  |  |  |  |  |  |  |  |  |  |  |  |  |  |  |  |  |  |  |
|                                                                                                                                                   |  |  |  |  |  |  |  |  |  |  |  |  |  |  |  |  |  |  |  |  |
|                                                                                                                                                   |  |  |  |  |  |  |  |  |  |  |  |  |  |  |  |  |  |  |  |  |
|                                                                                                                                                   |  |  |  |  |  |  |  |  |  |  |  |  |  |  |  |  |  |  |  |  |
|                                                                                                                                                   |  |  |  |  |  |  |  |  |  |  |  |  |  |  |  |  |  |  |  |  |
|                                                                                                                                                   |  |  |  |  |  |  |  |  |  |  |  |  |  |  |  |  |  |  |  |  |
|                                                                                                                                                   |  |  |  |  |  |  |  |  |  |  |  |  |  |  |  |  |  |  |  |  |
|                                                                                                                                                   |  |  |  |  |  |  |  |  |  |  |  |  |  |  |  |  |  |  |  |  |
|                                                                                                                                                   |  |  |  |  |  |  |  |  |  |  |  |  |  |  |  |  |  |  |  |  |
|                                                                                                                                                   |  |  |  |  |  |  |  |  |  |  |  |  |  |  |  |  |  |  |  |  |
|                                                                                                                                                   |  |  |  |  |  |  |  |  |  |  |  |  |  |  |  |  |  |  |  |  |
|                                                                                                                                                   |  |  |  |  |  |  |  |  |  |  |  |  |  |  |  |  |  |  |  |  |
|                                                                                                                                                   |  |  |  |  |  |  |  |  |  |  |  |  |  |  |  |  |  |  |  |  |
|                                                                                                                                                   |  |  |  |  |  |  |  |  |  |  |  |  |  |  |  |  |  |  |  |  |
|                                                                                                                                                   |  |  |  |  |  |  |  |  |  |  |  |  |  |  |  |  |  |  |  |  |
|                                                                                                                                                   |  |  |  |  |  |  |  |  |  |  |  |  |  |  |  |  |  |  |  |  |
|                                                                                                                                                   |  |  |  |  |  |  |  |  |  |  |  |  |  |  |  |  |  |  |  |  |
|                                                                                                                                                   |  |  |  |  |  |  |  |  |  |  |  |  |  |  |  |  |  |  |  |  |
|                                                                                                                                                   |  |  |  |  |  |  |  |  |  |  |  |  |  |  |  |  |  |  |  |  |
|                                                                                                                                                   |  |  |  |  |  |  |  |  |  |  |  |  |  |  |  |  |  |  |  |  |
|                                                                                                                                                   |  |  |  |  |  |  |  |  |  |  |  |  |  |  |  |  |  |  |  |  |
|                                                                                                                                                   |  |  |  |  |  |  |  |  |  |  |  |  |  |  |  |  |  |  |  |  |
|                                                                                                                                                   |  |  |  |  |  |  |  |  |  |  |  |  |  |  |  |  |  |  |  |  |
|                                                                                                                                                   |  |  |  |  |  |  |  |  |  |  |  |  |  |  |  |  |  |  |  |  |
|                                                                                                                                                   |  |  |  |  |  |  |  |  |  |  |  |  |  |  |  |  |  |  |  |  |
|                                                                                                                                                   |  |  |  |  |  |  |  |  |  |  |  |  |  |  |  |  |  |  |  |  |
|                                                                                                                                                   |  |  |  |  |  |  |  |  |  |  |  |  |  |  |  |  |  |  |  |  |
|                                                                                                                                                   |  |  |  |  |  |  |  |  |  |  |  |  |  |  |  |  |  |  |  |  |
|                                                                                                                                                   |  |  |  |  |  |  |  |  |  |  |  |  |  |  |  |  |  |  |  |  |
|                                                                                                                                                   |  |  |  |  |  |  |  |  |  |  |  |  |  |  |  |  |  |  |  |  |
|                                                                                                                                                   |  |  |  |  |  |  |  |  |  |  |  |  |  |  |  |  |  |  |  |  |
|                                                                                                                                                   |  |  |  |  |  |  |  |  |  |  |  |  |  |  |  |  |  |  |  |  |

(b)

|                                                                                                                                                                                                                            |                                        |                   |                |                       |                       |                |                    |                |          |                       |                       |                |                    |                |          |                 |  |  |  |  |  |  |  |  |  |  |  |  |  |  |  |
|----------------------------------------------------------------------------------------------------------------------------------------------------------------------------------------------------------------------------|----------------------------------------|-------------------|----------------|-----------------------|-----------------------|----------------|--------------------|----------------|----------|-----------------------|-----------------------|----------------|--------------------|----------------|----------|-----------------|--|--|--|--|--|--|--|--|--|--|--|--|--|--|--|
| <b>Note:</b><br>P <sub>mean</sub> > 5% is the confidence interval<br><br><b>Note:</b><br>sp carbons include C≡N<br>sp <sup>2</sup> -CH/C for double bonds except carbonyl group<br>C=O includes only ketones and aldehydes |                                        |                   |                |                       |                       |                |                    |                |          |                       |                       |                |                    |                |          |                 |  |  |  |  |  |  |  |  |  |  |  |  |  |  |  |
|                                                                                                                                                                                                                            |                                        |                   |                |                       |                       |                |                    |                |          |                       |                       |                |                    |                |          |                 |  |  |  |  |  |  |  |  |  |  |  |  |  |  |  |
|                                                                                                                                                                                                                            |                                        |                   |                |                       |                       |                |                    |                |          |                       |                       |                |                    |                |          |                 |  |  |  |  |  |  |  |  |  |  |  |  |  |  |  |
|                                                                                                                                                                                                                            |                                        |                   |                |                       |                       |                |                    |                |          |                       |                       |                |                    |                |          |                 |  |  |  |  |  |  |  |  |  |  |  |  |  |  |  |
|                                                                                                                                                                                                                            |                                        |                   |                |                       |                       |                |                    |                |          |                       |                       |                |                    |                |          |                 |  |  |  |  |  |  |  |  |  |  |  |  |  |  |  |
| <b>Isomer 1</b>                                                                                                                                                                                                            |                                        |                   |                |                       |                       |                |                    |                |          |                       |                       |                |                    |                |          | <b>Isomer 2</b> |  |  |  |  |  |  |  |  |  |  |  |  |  |  |  |
| <b>Heavy atom bear</b>                                                                                                                                                                                                     | <b>Type of carbon</b>                  | <b>Carbon no.</b> | <b>Exptl δ</b> | <b>Shielding tens</b> | <b>Corr Shielding</b> | <b>Calcd δ</b> | <b>Calcd δ (S)</b> | <b>abs dev</b> | <b>P</b> | <b>Shielding tens</b> | <b>Corr Shielding</b> | <b>Calcd δ</b> | <b>Calcd δ (S)</b> | <b>abs dev</b> | <b>P</b> | <b>S</b>        |  |  |  |  |  |  |  |  |  |  |  |  |  |  |  |
| None                                                                                                                                                                                                                       | sp <sup>3</sup> -CH <sub>2</sub> /CH/C |                   | 78.4           | 121.1445606           | 121.1445606           | 75.44          | 76.49              | 1.91           | 0.09     | 121.306514            | 121.31                | 75.28          | 76.28              | 2.12           | 0.06     |                 |  |  |  |  |  |  |  |  |  |  |  |  |  |  |  |
| C-Cl                                                                                                                                                                                                                       | sp <sup>3</sup> -CH <sub>2</sub> /CH/C |                   | 71.8           | 116.2302597           | 124.6409403           | 71.85          | 72.91              | 1.11           | 0.32     | 116.0448467           | 124.47                | 72.03          | 73.04              | 1.24           | 0.26     |                 |  |  |  |  |  |  |  |  |  |  |  |  |  |  |  |
|                                                                                                                                                                                                                            | sp <sup>2</sup> -CH                    |                   | 134.5          | 66.10566204           | 66.10566204           | 132.71         | 133.59             | 0.91           | 0.56     | 65.93316549           | 65.93                 | 132.87         | 133.68             | 0.82           | 0.59     |                 |  |  |  |  |  |  |  |  |  |  |  |  |  |  |  |
|                                                                                                                                                                                                                            | sp <sup>2</sup> -CH                    |                   | 129.8          | 68.24832935           | 68.24832935           | 130.71         | 131.60             | 1.80           | 0.24     | 68.11119355           | 68.11                 | 130.84         | 131.66             | 1.86           | 0.23     |                 |  |  |  |  |  |  |  |  |  |  |  |  |  |  |  |
| C-Cl                                                                                                                                                                                                                       | sp <sup>3</sup> -CH <sub>2</sub> /CH/C |                   | 67.9           | 123.9684263           | 131.6223142           | 64.69          | 65.77              | 2.13           | 0.05     | 123.9459762           | 131.60                | 64.71          | 65.74              | 2.16           | 0.05     |                 |  |  |  |  |  |  |  |  |  |  |  |  |  |  |  |
| C-Cl                                                                                                                                                                                                                       | sp <sup>3</sup> -CH <sub>2</sub> /CH/C |                   | 71.7           | 114.9072949           | 123.4473614           | 73.08          | 74.13              | 2.43           | 0.03     | 114.8281229           | 123.38                | 73.15          | 74.16              | 2.46           | 0.03     |                 |  |  |  |  |  |  |  |  |  |  |  |  |  |  |  |
|                                                                                                                                                                                                                            | sp <sup>2</sup> -CH                    |                   | 139.5          | 60.74881305           | 60.74881305           | 137.70         | 138.57             | 0.93           | 0.54     | 60.80547012           | 60.81                 | 137.65         | 138.44             | 1.06           | 0.49     |                 |  |  |  |  |  |  |  |  |  |  |  |  |  |  |  |
|                                                                                                                                                                                                                            | sp <sup>2</sup> -CH <sub>2</sub>       |                   | 116.5          | 80.70268373           | 80.70268373           | 115.85         | 116.78             | 0.28           | 0.52     | 80.60929049           | 80.61                 | 115.94         | 116.80             | 0.30           | 0.49     |                 |  |  |  |  |  |  |  |  |  |  |  |  |  |  |  |
|                                                                                                                                                                                                                            | sp <sup>3</sup> -CH <sub>3</sub>       |                   | 25             | 171.4031183           | 171.4031183           | 23.83          | 25.03              | 0.03           | 0.98     | 171.1996226           | 171.20                | 24.04          | 25.22              | 0.22           | 0.83     |                 |  |  |  |  |  |  |  |  |  |  |  |  |  |  |  |
|                                                                                                                                                                                                                            | sp <sup>3</sup> -CH <sub>3</sub>       |                   | 24.9           | 171.307225            | 171.307225            | 23.93          | 25.13              | 0.23           | 0.82     | 171.4205303           | 171.42                | 23.81          | 24.99              | 0.09           | 0.93     |                 |  |  |  |  |  |  |  |  |  |  |  |  |  |  |  |
|                                                                                                                                                                                                                            |                                        |                   |                |                       |                       |                |                    |                |          |                       |                       |                |                    |                |          |                 |  |  |  |  |  |  |  |  |  |  |  |  |  |  |  |

**Figure S31.** Experimental and GIAO NMR calculated data for 3*R*\*,4*S*\*,7*S*\*-**2** (isomer 1) and 3*R*\*,4*S*\*,7*R*\*-**2** (isomer 2) following the STS method. (a) Data were generated following the STS method without further dichloro correction. (b) Data were generated following the STS method with further correction for dichloro carbon (marked in red).

(a)

| <b>Note:</b><br>Pmean > 5% is the confidence interval                                                                                             |                                        |            |         |                |                |         |              |         |      | <table><tr><td>MAE</td><td>4.69</td></tr><tr><td>RMS</td><td>7.14</td></tr><tr><td>P<sub>mean</sub></td><td>#NUM!</td></tr><tr><td>Prel</td><td>#NUM!</td></tr></table> |                |         |              |         |      | MAE | 4.69 | RMS | 7.14 | P <sub>mean</sub> | #NUM! | Prel | #NUM! |  |  |  |  |  |  | <table><tr><td>MAE</td><td>6.60</td></tr><tr><td>RMS</td><td>8.93</td></tr><tr><td>P<sub>mean</sub></td><td>#NUM!</td></tr><tr><td>Prel</td><td>#NUM!</td></tr></table> |  |  |  |  |  | MAE | 6.60 | RMS | 8.93 | P <sub>mean</sub> | #NUM! | Prel | #NUM! |
|---------------------------------------------------------------------------------------------------------------------------------------------------|----------------------------------------|------------|---------|----------------|----------------|---------|--------------|---------|------|-------------------------------------------------------------------------------------------------------------------------------------------------------------------------|----------------|---------|--------------|---------|------|-----|------|-----|------|-------------------|-------|------|-------|--|--|--|--|--|--|-------------------------------------------------------------------------------------------------------------------------------------------------------------------------|--|--|--|--|--|-----|------|-----|------|-------------------|-------|------|-------|
| MAE                                                                                                                                               | 4.69                                   |            |         |                |                |         |              |         |      |                                                                                                                                                                         |                |         |              |         |      |     |      |     |      |                   |       |      |       |  |  |  |  |  |  |                                                                                                                                                                         |  |  |  |  |  |     |      |     |      |                   |       |      |       |
| RMS                                                                                                                                               | 7.14                                   |            |         |                |                |         |              |         |      |                                                                                                                                                                         |                |         |              |         |      |     |      |     |      |                   |       |      |       |  |  |  |  |  |  |                                                                                                                                                                         |  |  |  |  |  |     |      |     |      |                   |       |      |       |
| P <sub>mean</sub>                                                                                                                                 | #NUM!                                  |            |         |                |                |         |              |         |      |                                                                                                                                                                         |                |         |              |         |      |     |      |     |      |                   |       |      |       |  |  |  |  |  |  |                                                                                                                                                                         |  |  |  |  |  |     |      |     |      |                   |       |      |       |
| Prel                                                                                                                                              | #NUM!                                  |            |         |                |                |         |              |         |      |                                                                                                                                                                         |                |         |              |         |      |     |      |     |      |                   |       |      |       |  |  |  |  |  |  |                                                                                                                                                                         |  |  |  |  |  |     |      |     |      |                   |       |      |       |
| MAE                                                                                                                                               | 6.60                                   |            |         |                |                |         |              |         |      |                                                                                                                                                                         |                |         |              |         |      |     |      |     |      |                   |       |      |       |  |  |  |  |  |  |                                                                                                                                                                         |  |  |  |  |  |     |      |     |      |                   |       |      |       |
| RMS                                                                                                                                               | 8.93                                   |            |         |                |                |         |              |         |      |                                                                                                                                                                         |                |         |              |         |      |     |      |     |      |                   |       |      |       |  |  |  |  |  |  |                                                                                                                                                                         |  |  |  |  |  |     |      |     |      |                   |       |      |       |
| P <sub>mean</sub>                                                                                                                                 | #NUM!                                  |            |         |                |                |         |              |         |      |                                                                                                                                                                         |                |         |              |         |      |     |      |     |      |                   |       |      |       |  |  |  |  |  |  |                                                                                                                                                                         |  |  |  |  |  |     |      |     |      |                   |       |      |       |
| Prel                                                                                                                                              | #NUM!                                  |            |         |                |                |         |              |         |      |                                                                                                                                                                         |                |         |              |         |      |     |      |     |      |                   |       |      |       |  |  |  |  |  |  |                                                                                                                                                                         |  |  |  |  |  |     |      |     |      |                   |       |      |       |
| <b>Note:</b><br>sp carbons include C≡N<br>sp <sup>2</sup> -CH/C for double bonds except carbonyl group<br>C=O includes only ketones and aldehydes |                                        |            |         | Isomer 1       |                |         |              |         |      | Isomer 2                                                                                                                                                                |                |         |              |         |      |     |      |     |      |                   |       |      |       |  |  |  |  |  |  |                                                                                                                                                                         |  |  |  |  |  |     |      |     |      |                   |       |      |       |
| Heavy atom bear                                                                                                                                   | Type of carbon                         | Carbon no. | Exptl δ | Shielding tens | Corr Shielding | Calcd δ | Calcd δ (SC) | abs dev | P    | Shielding tens                                                                                                                                                          | Corr Shielding | Calcd δ | Calcd δ (SC) | abs dev | P    |     |      |     |      |                   |       |      |       |  |  |  |  |  |  |                                                                                                                                                                         |  |  |  |  |  |     |      |     |      |                   |       |      |       |
| None                                                                                                                                              | sp <sup>2</sup> -CH <sub>2</sub>       |            | 116.5   | 80.41362258    | 80.41362258    | 116.13  | 114.27       | 2.23    | 0.00 | 80.58313663                                                                                                                                                             | 80.58          | 115.96  | 113.66       | 2.84    | 0.00 |     |      |     |      |                   |       |      |       |  |  |  |  |  |  |                                                                                                                                                                         |  |  |  |  |  |     |      |     |      |                   |       |      |       |
| None                                                                                                                                              | sp <sup>2</sup> -CH                    |            | 139.5   | 61.61190888    | 61.61190888    | 136.90  | 136.26       | 3.24    | 0.04 | 61.1942226                                                                                                                                                              | 61.19          | 137.29  | 136.23       | 3.27    | 0.03 |     |      |     |      |                   |       |      |       |  |  |  |  |  |  |                                                                                                                                                                         |  |  |  |  |  |     |      |     |      |                   |       |      |       |
| C-Cl                                                                                                                                              | sp <sup>3</sup> -CH <sub>2</sub> /CH/C |            | 71.9    | 115.0610618    | 123.58609      | 72.94   | 68.55        | 3.35    | 0.00 | 115.2529073                                                                                                                                                             | 123.76         | 72.76   | 67.95        | 3.95    | 0.00 |     |      |     |      |                   |       |      |       |  |  |  |  |  |  |                                                                                                                                                                         |  |  |  |  |  |     |      |     |      |                   |       |      |       |
| C-Cl                                                                                                                                              | sp <sup>3</sup> -CH <sub>2</sub> /CH/C |            | 68.8    | 120.4282047    | 128.4283263    | 67.97   | 63.28        | 5.52    | 0.00 | 120.1858022                                                                                                                                                             | 128.21         | 68.19   | 63.11        | 5.69    | 0.00 |     |      |     |      |                   |       |      |       |  |  |  |  |  |  |                                                                                                                                                                         |  |  |  |  |  |     |      |     |      |                   |       |      |       |
| None                                                                                                                                              | sp <sup>2</sup> -CH                    |            | 130.2   | 68.36281881    | 68.36281881    | 130.61  | 129.60       | 0.60    | 0.70 | 65.37133991                                                                                                                                                             | 65.37          | 133.39  | 132.11       | 1.91    | 0.22 |     |      |     |      |                   |       |      |       |  |  |  |  |  |  |                                                                                                                                                                         |  |  |  |  |  |     |      |     |      |                   |       |      |       |
| None                                                                                                                                              | sp <sup>2</sup> -CH                    |            | 128.3   | 70.03796712    | 70.03796712    | 129.05  | 127.95       | 0.35    | 0.82 | 75.0720184                                                                                                                                                              | 75.07          | 124.36  | 122.55       | 5.75    | 0.00 |     |      |     |      |                   |       |      |       |  |  |  |  |  |  |                                                                                                                                                                         |  |  |  |  |  |     |      |     |      |                   |       |      |       |
| None                                                                                                                                              | sp <sup>2</sup> -C                     |            | 138.5   | 60.16600267    | 60.16600267    | 139.08  | 138.58       | 0.08    | 0.97 | 61.99002443                                                                                                                                                             | 61.99          | 137.29  | 136.24       | 2.26    | 0.24 |     |      |     |      |                   |       |      |       |  |  |  |  |  |  |                                                                                                                                                                         |  |  |  |  |  |     |      |     |      |                   |       |      |       |
| C-Cl                                                                                                                                              | sp <sup>2</sup> -CH                    |            | 117.2   | 70.5105394     | 76.6679155     | 122.87  | 121.41       | 4.21    | 0.01 | 66.35225454                                                                                                                                                             | 72.58          | 126.68  | 125.00       | 7.80    | 0.00 |     |      |     |      |                   |       |      |       |  |  |  |  |  |  |                                                                                                                                                                         |  |  |  |  |  |     |      |     |      |                   |       |      |       |
| None                                                                                                                                              | sp <sup>3</sup> -CH <sub>3</sub>       |            | 25.1    | 171.0685685    | 171.0685685    | 24.18   | 16.93        | 8.17    | 0.00 | 171.6924108                                                                                                                                                             | 171.69         | 23.53   | 15.86        | 9.24    | 0.00 |     |      |     |      |                   |       |      |       |  |  |  |  |  |  |                                                                                                                                                                         |  |  |  |  |  |     |      |     |      |                   |       |      |       |
| C-Br                                                                                                                                              | sp <sup>3</sup> -CH <sub>2</sub> /CH/C |            | 33.7    | 124.0980213    | 138.0137334    | 58.13   | 52.87        | 19.17   | 0.00 | 119.8368788                                                                                                                                                             | 133.84         | 62.41   | 56.99        | 23.29   | 0.00 |     |      |     |      |                   |       |      |       |  |  |  |  |  |  |                                                                                                                                                                         |  |  |  |  |  |     |      |     |      |                   |       |      |       |
|                                                                                                                                                   |                                        |            |         |                |                |         |              |         |      |                                                                                                                                                                         |                |         |              |         |      |     |      |     |      |                   |       |      |       |  |  |  |  |  |  |                                                                                                                                                                         |  |  |  |  |  |     |      |     |      |                   |       |      |       |
|                                                                                                                                                   |                                        |            |         |                |                |         |              |         |      |                                                                                                                                                                         |                |         |              |         |      |     |      |     |      |                   |       |      |       |  |  |  |  |  |  |                                                                                                                                                                         |  |  |  |  |  |     |      |     |      |                   |       |      |       |

(b)

|                                                                                                                                                                                                                |                                        |            |         |                          |                |         |              |         |      |                         |                |         |              |         |      |
|----------------------------------------------------------------------------------------------------------------------------------------------------------------------------------------------------------------|----------------------------------------|------------|---------|--------------------------|----------------|---------|--------------|---------|------|-------------------------|----------------|---------|--------------|---------|------|
| <b>Note:</b><br>Pmean > 5% is the confidence interval<br><br><b>Note:</b><br>sp carbons include C≡N<br>sp <sup>2</sup> -CH/C for double bonds except carbonyl group<br>C=O includes only ketones and aldehydes |                                        |            |         |                          |                |         |              |         |      |                         |                |         |              |         |      |
|                                                                                                                                                                                                                |                                        |            |         |                          |                |         |              |         |      |                         |                |         |              |         |      |
|                                                                                                                                                                                                                |                                        |            |         | MAE                      |                |         | 1.57         |         |      | MAE                     |                |         | 3.17         |         |      |
|                                                                                                                                                                                                                |                                        |            |         | RMS                      |                |         | 2.20         |         |      | RMS                     |                |         | 3.90         |         |      |
|                                                                                                                                                                                                                |                                        |            |         | P <sub>mean</sub> 11.24% |                |         |              |         |      | P <sub>mean</sub> 0.51% |                |         |              |         |      |
|                                                                                                                                                                                                                |                                        |            |         | Prel 100.00%             |                |         |              |         |      | Prel 0.00%              |                |         |              |         |      |
|                                                                                                                                                                                                                |                                        |            |         | Isomer 1                 |                |         |              |         |      | Isomer 2                |                |         |              |         |      |
| Heavy atom bear                                                                                                                                                                                                | Type of carbon                         | Carbon no. | Exptl δ | Shielding tens           | Corr Shielding | Calcd δ | Calcd δ (SC) | abs dev | P    | Shielding tens          | Corr Shielding | Calcd δ | Calcd δ (SC) | abs dev | P    |
| None                                                                                                                                                                                                           | sp <sup>2</sup> -CH <sub>2</sub>       |            | 116.5   | 80.41362258              | 80.41362258    | 116.13  | 115.47       | 1.03    | 0.03 | 80.58313663             | 80.58          | 115.96  | 115.13       | 1.37    | 0.01 |
| None                                                                                                                                                                                                           | sp <sup>2</sup> -CH                    |            | 139.5   | 61.61190888              | 61.61190888    | 136.90  | 136.28       | 3.22    | 0.04 | 61.1942226              | 61.19          | 137.29  | 136.57       | 2.93    | 0.06 |
| C-Cl                                                                                                                                                                                                           | sp <sup>3</sup> -CH <sub>2</sub> /CH/C |            | 71.9    | 115.0610618              | 123.58609      | 72.94   | 72.19        | 0.29    | 0.80 | 115.2529073             | 123.76         | 72.76   | 71.67        | 0.23    | 0.83 |
| C-Cl                                                                                                                                                                                                           | sp <sup>3</sup> -CH <sub>2</sub> /CH/C |            | 68.8    | 120.4282047              | 128.4283263    | 67.97   | 67.20        | 1.60    | 0.15 | 120.1858022             | 128.21         | 68.19   | 67.07        | 1.73    | 0.12 |
| None                                                                                                                                                                                                           | sp <sup>2</sup> -CH                    |            | 130.2   | 68.36281881              | 68.36281881    | 130.61  | 129.98       | 0.22    | 0.89 | 65.37133991             | 65.37          | 133.39  | 132.66       | 2.46    | 0.11 |
| None                                                                                                                                                                                                           | sp <sup>2</sup> -CH                    |            | 128.3   | 70.03796712              | 70.03796712    | 129.05  | 128.42       | 0.12    | 0.94 | 75.0720184              | 75.07          | 124.36  | 123.57       | 4.73    | 0.00 |
| None                                                                                                                                                                                                           | sp <sup>2</sup> -C                     |            | 138.5   | 60.16600267              | 60.16600267    | 139.08  | 138.48       | 0.02    | 0.99 | 61.99002443             | 61.99          | 137.29  | 136.58       | 1.92    | 0.32 |
| C-Cl                                                                                                                                                                                                           | sp <sup>2</sup> -CH                    |            | 117.2   | 70.5105394               | 76.6679155     | 122.87  | 122.23       | 5.03    | 0.00 | 66.35225454             | 72.58          | 126.68  | 125.90       | 8.70    | 0.00 |
| None                                                                                                                                                                                                           | sp <sup>3</sup> -CH <sub>3</sub>       |            | 25.1    | 171.0685685              | 171.0685685    | 24.18   | 23.32        | 1.78    | 0.09 | 171.6924108             | 171.69         | 23.53   | 22.15        | 2.95    | 0.00 |
| None                                                                                                                                                                                                           | sp <sup>3</sup> -CH <sub>2</sub> /CH/C |            | 33.7    | 158.6274614              | 158.6274614    | 36.96   | 36.13        | 2.43    | 0.03 | 155.981718              | 155.98         | 39.68   | 38.40        | 4.70    | 0.00 |
|                                                                                                                                                                                                                |                                        |            |         |                          |                |         |              |         |      |                         |                |         |              |         |      |

**Figure S32.** Experimental and GIAO NMR calculated data for **7Z-3** (isomer 1) and **7E-3** (isomer 2) following the STS method. (a) Data were generated following the STS method without further dibromo correction. (b) Data were generated following the STS method with further correction for dibromo carbon (marked in red).

**Table S1.** <sup>1</sup>H and <sup>13</sup>C NMR spectroscopic data of **3**, **4**, and **5** in acetone-*d*<sub>6</sub>.

| Position | <b>3<sup>a</sup></b>       |                                       | <b>4<sup>b</sup></b>       |                                       | <b>5<sup>b</sup></b>       |                                       |
|----------|----------------------------|---------------------------------------|----------------------------|---------------------------------------|----------------------------|---------------------------------------|
|          | $\delta_{\text{C}}$ (type) | $\delta_{\text{H}}$ ( <i>J</i> in Hz) | $\delta_{\text{C}}$ (type) | $\delta_{\text{H}}$ ( <i>J</i> in Hz) | $\delta_{\text{C}}$ (type) | $\delta_{\text{H}}$ ( <i>J</i> in Hz) |
| 1        | 117.0 (CH <sub>2</sub> )   | 5.31 d (10.8)<br>5.47 d (17.2)        | 116.9 (CH <sub>2</sub> )   | 5.30 d (11.0)<br>5.46 d (17.0)        | 117.1 (CH <sub>2</sub> )   | 5.31 d (10.8)<br>5.48 d (16.8)        |
| 2        | 140.4 (CH)                 | 6.15 dd (17.2, 10.8)                  | 140.4 (CH)                 | 6.16 dd (17.0, 11.0)                  | 140.4 (CH)                 | 6.06 dd (16.8, 10.8)                  |
| 3        | 73.4 (C)                   |                                       | 73.4 (C)                   |                                       | 73.7 (C)                   |                                       |
| 4        | 70.0 (CH)                  | 4.95 d (8.0)                          | 70.0 (CH)                  | 4.92 d (8.5)                          | 70.0 (CH)                  | 4.92 d (8.4)                          |
| 5        | 131.1 (CH)                 | 6.48 dd (15.2, 8.0)                   | 131.2 (CH)                 | 6.45 dd (16.0, 8.5)                   | 131.3 (CH)                 | 6.46 dd (16.0, 8.0)                   |
| 6        | 129.1 (CH)                 | 6.55 d (15.2)                         | 127.7 (CH)                 | 6.52 d (16.0)                         | 127.7 (CH)                 | 6.53 d (16.0)                         |
| 7        | 139.3 (C)                  |                                       | 138.3 (C)                  |                                       | 138.4 (C)                  |                                       |
| 8        | 119.2 (CH)                 | 6.64 s                                | 121.4 (CH)                 | 6.81 s                                | 119.2 (CH)                 | 6.64 s                                |
| 9        | 26.1 (CH <sub>3</sub> )    | 1.82 s                                | 26.0 (CH <sub>3</sub> )    | 1.81 s                                | 27.4 (CH <sub>3</sub> )    | 1.80 s                                |
| 10       | 34.9 (CH)                  | 7.19 s                                | 66.9 (CH)                  | 7.25 s                                | 66.9 (CH)                  | 7.26 s                                |

<sup>a</sup> <sup>13</sup>C and <sup>1</sup>H spectroscopic data were recorded at 100 and 400 MHz, respectively. <sup>b</sup> <sup>13</sup>C and <sup>1</sup>H spectroscopic data were recorded at 125 and 500 MHz, respectively.

**Table S2.** Comparison of specific optical rotations and selected NMR data of synthetic halogenated monoterpenes.<sup>a</sup>

| structure                                                                           | $[\alpha]_D$ (CHCl <sub>3</sub> ) | $\delta_H$ (H-6)<br>(CDCl <sub>3</sub> ) | $\delta_C$ (C-9)<br>(CDCl <sub>3</sub> ) |
|-------------------------------------------------------------------------------------|-----------------------------------|------------------------------------------|------------------------------------------|
| 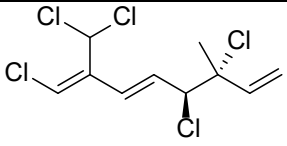   | −6.2 (synthetic)                  | 6.34–6.35<br>(CDCl <sub>3</sub> )        | 25.2 (CDCl <sub>3</sub> )                |
|    | −32.0 (synthetic)                 | 6.63 (CDCl <sub>3</sub> )                | 25.2 (CDCl <sub>3</sub> )                |
|    | −28.3 (synthetic)                 | 6.33–6.34<br>(CDCl <sub>3</sub> )        | 27.7 (CDCl <sub>3</sub> )                |
|    | −58.8 (synthetic)                 | 6.63 (CDCl <sub>3</sub> )                | 27.7 (CDCl <sub>3</sub> )                |
|   | −32.1 (synthetic)                 | 6.33 (CDCl <sub>3</sub> )                | 26.4 (CDCl <sub>3</sub> )                |
|  | −28.7 (synthetic)                 | 6.78 (CDCl <sub>3</sub> )                | 26.4 (CDCl <sub>3</sub> )                |

<sup>a</sup> Vogel et al. *Angew. Chem. Int. Ed.* **2014**, 53, 12205–12209.
